# Supplementary material for: Clofarabine induces ERK/MSK/CREB activation through inhibiting CD99 on Ewing sarcoma cells
Source: PubMed Central journal article supplement (PMC8208565; doi:10.1371/journal.pone.0253170), 2021-06-16

**Figure 1A**

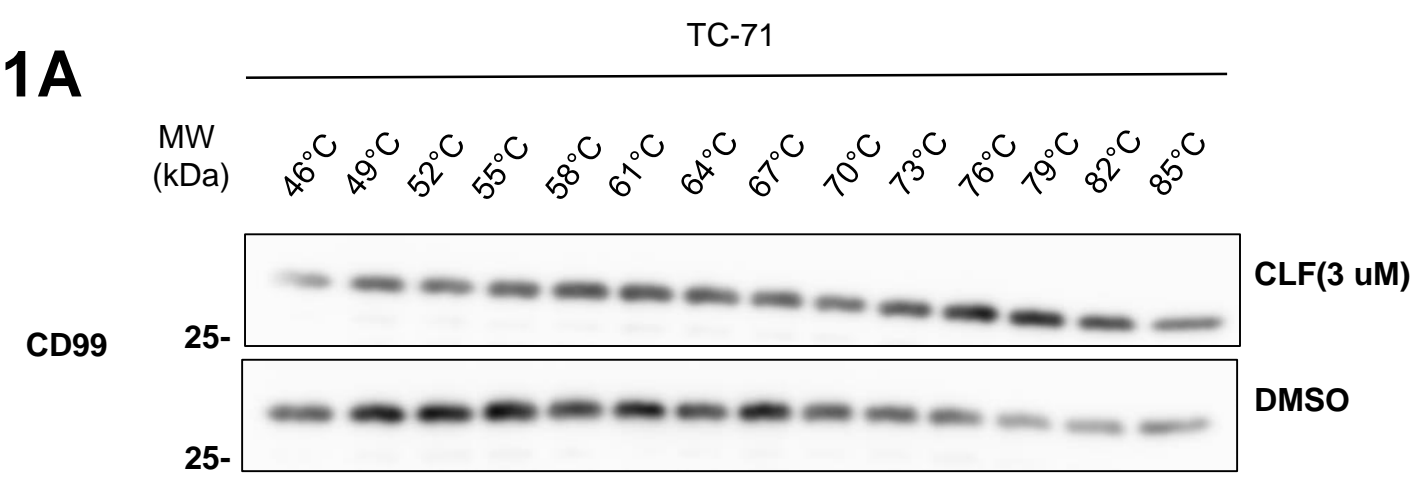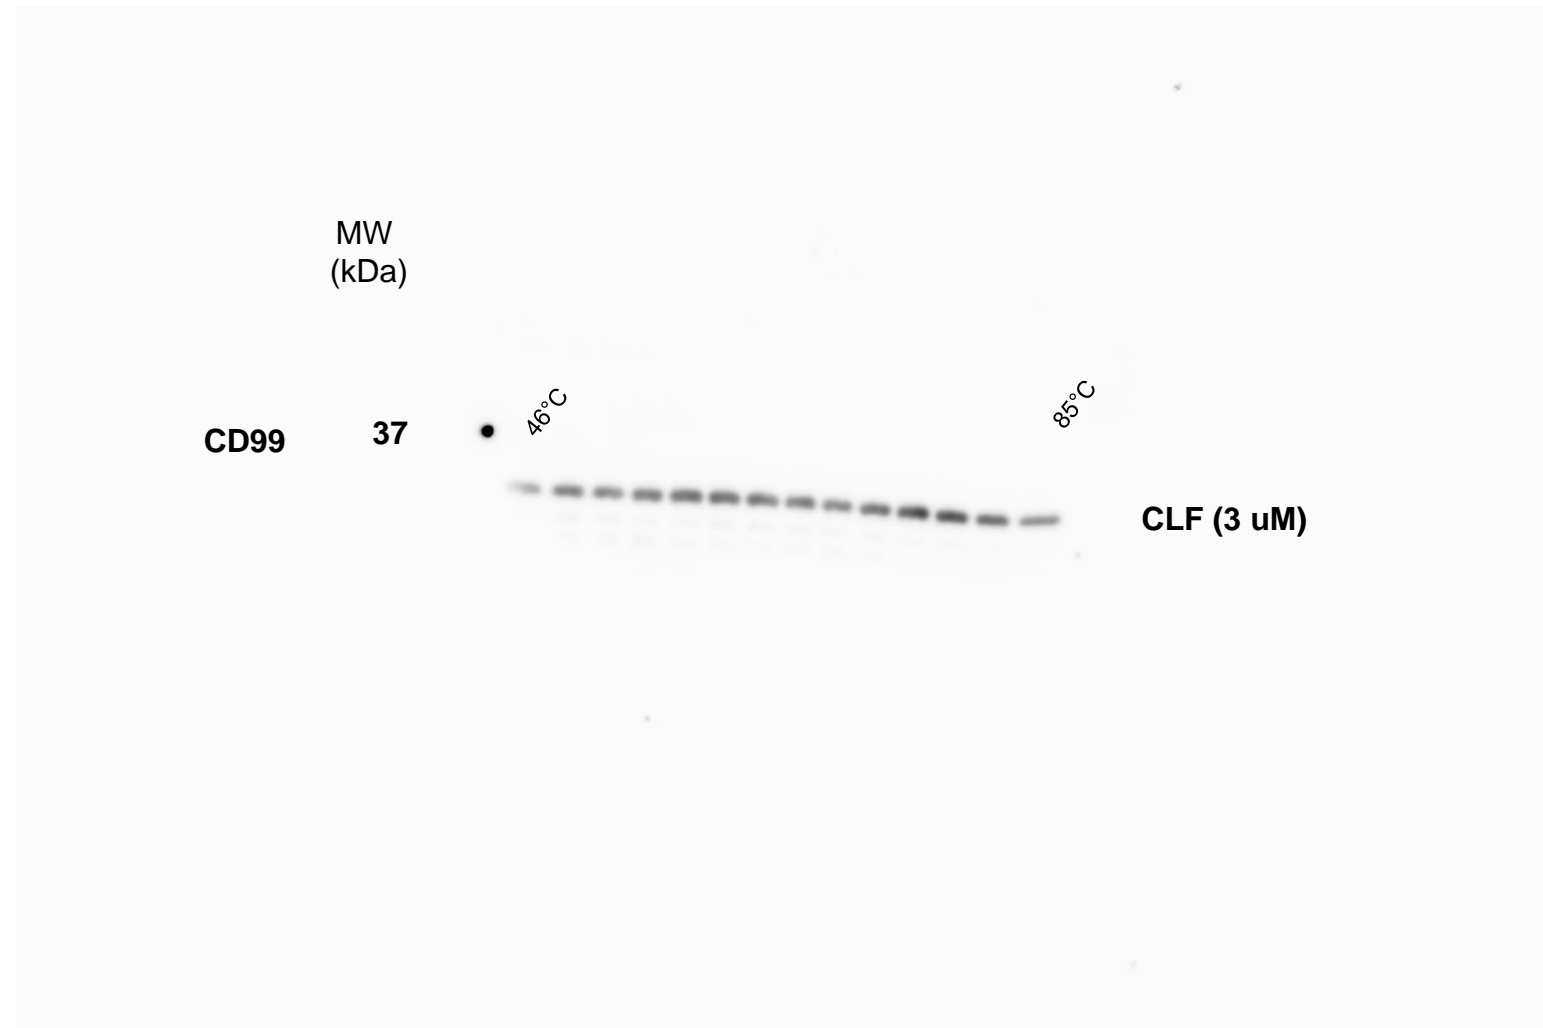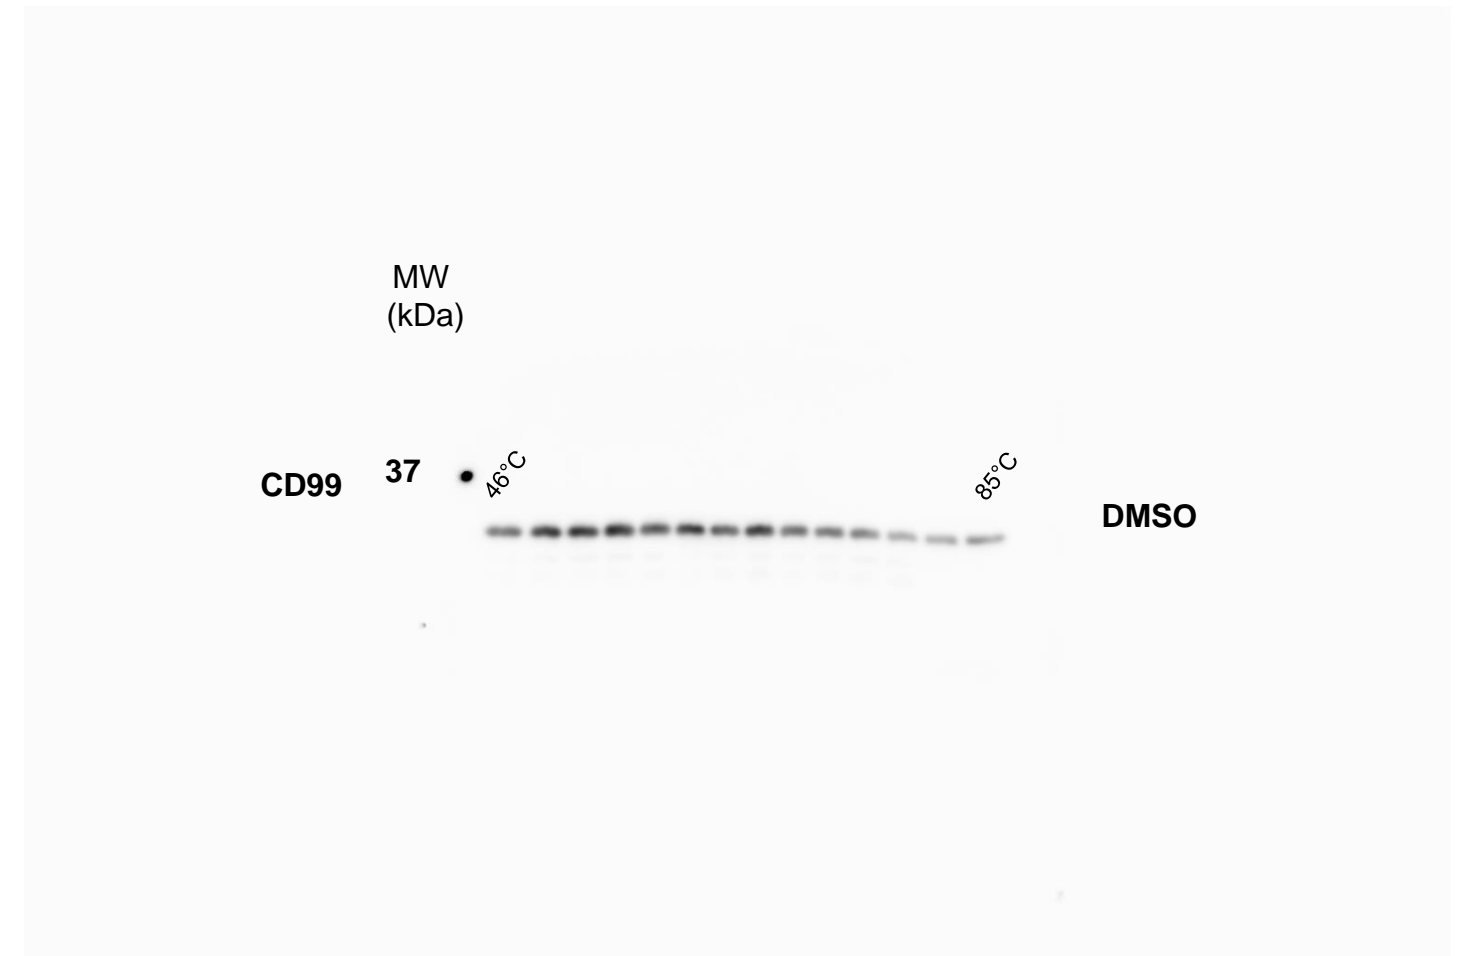

**Figure 1C, 1D**

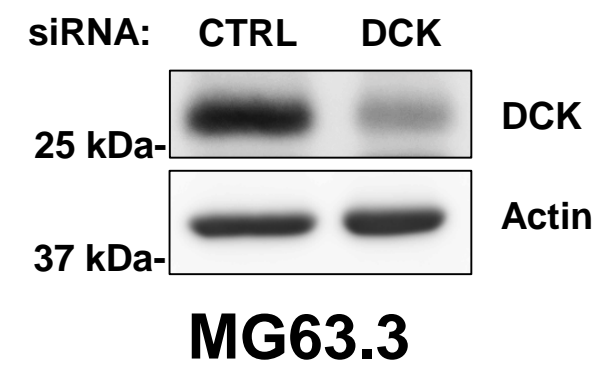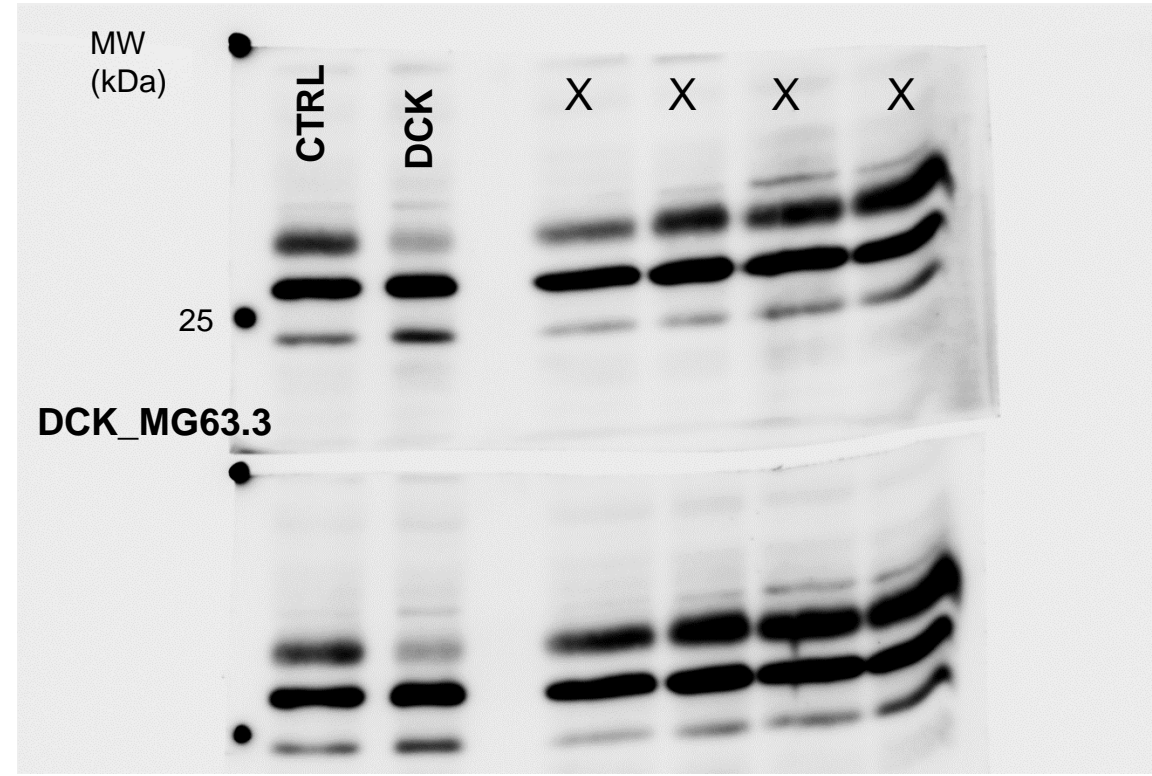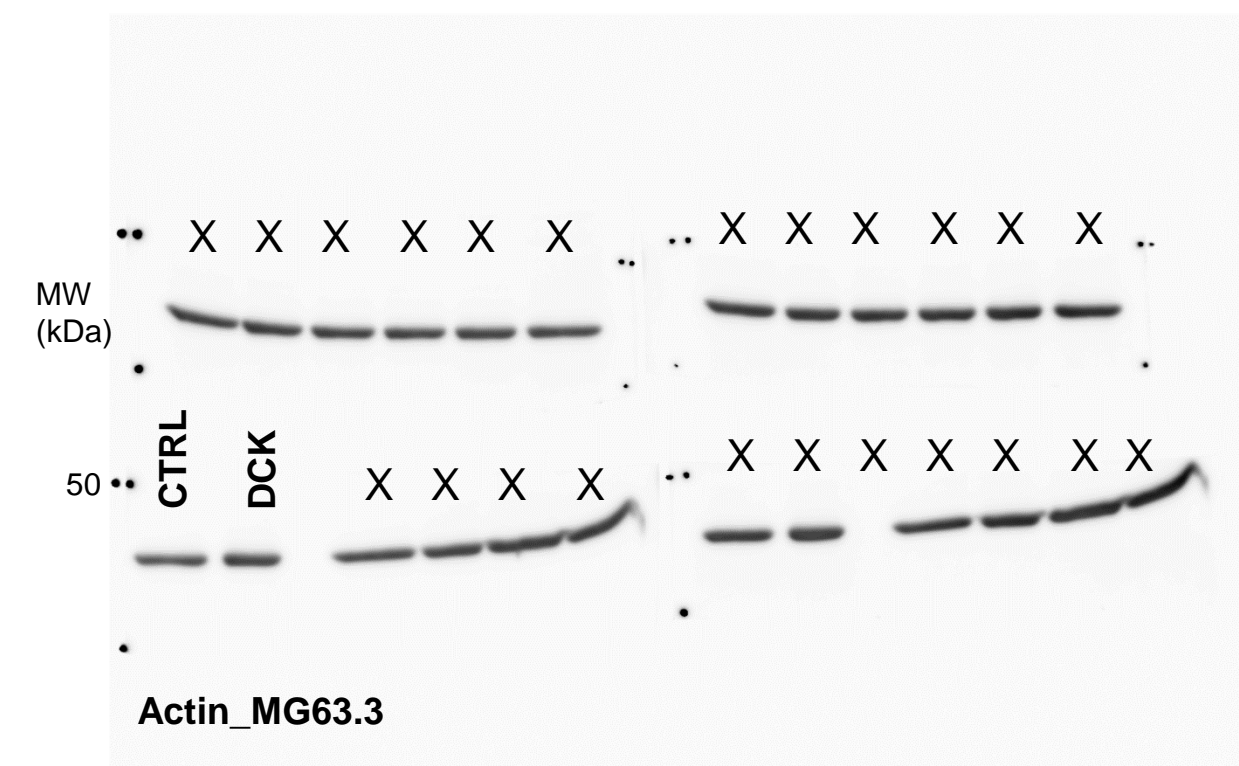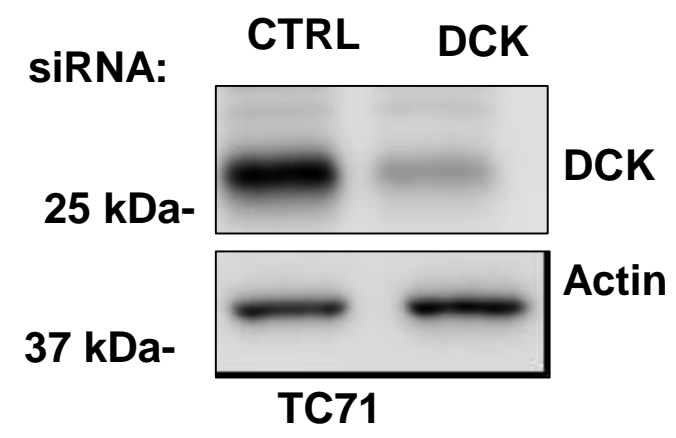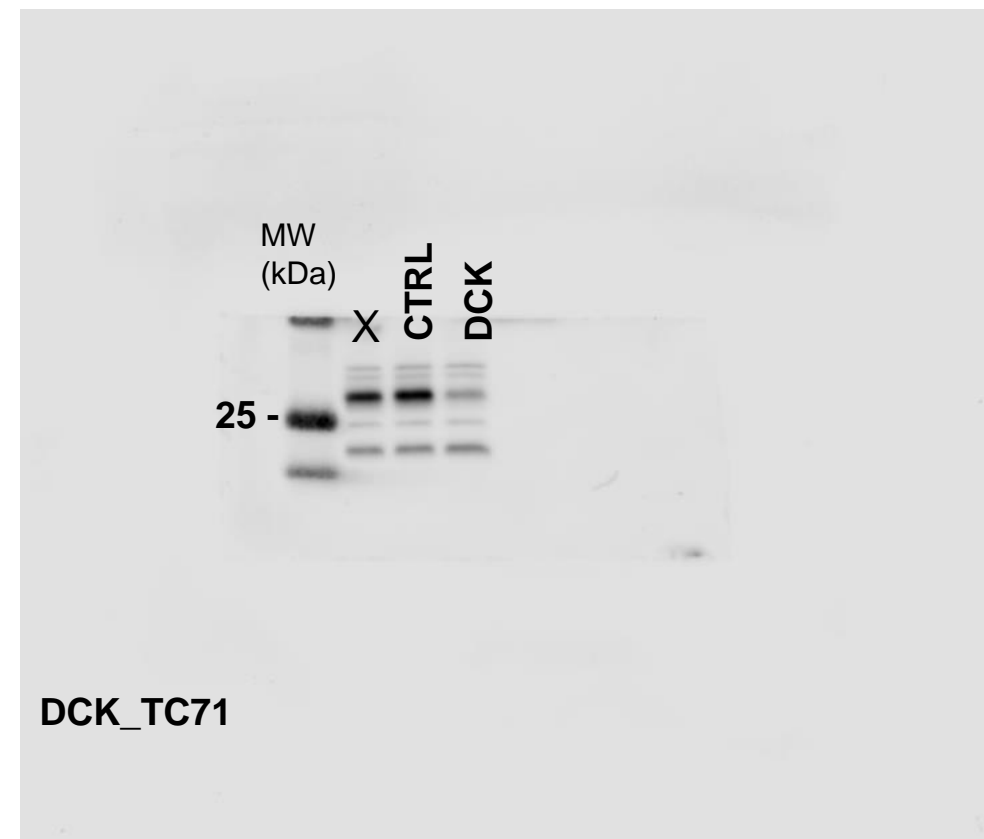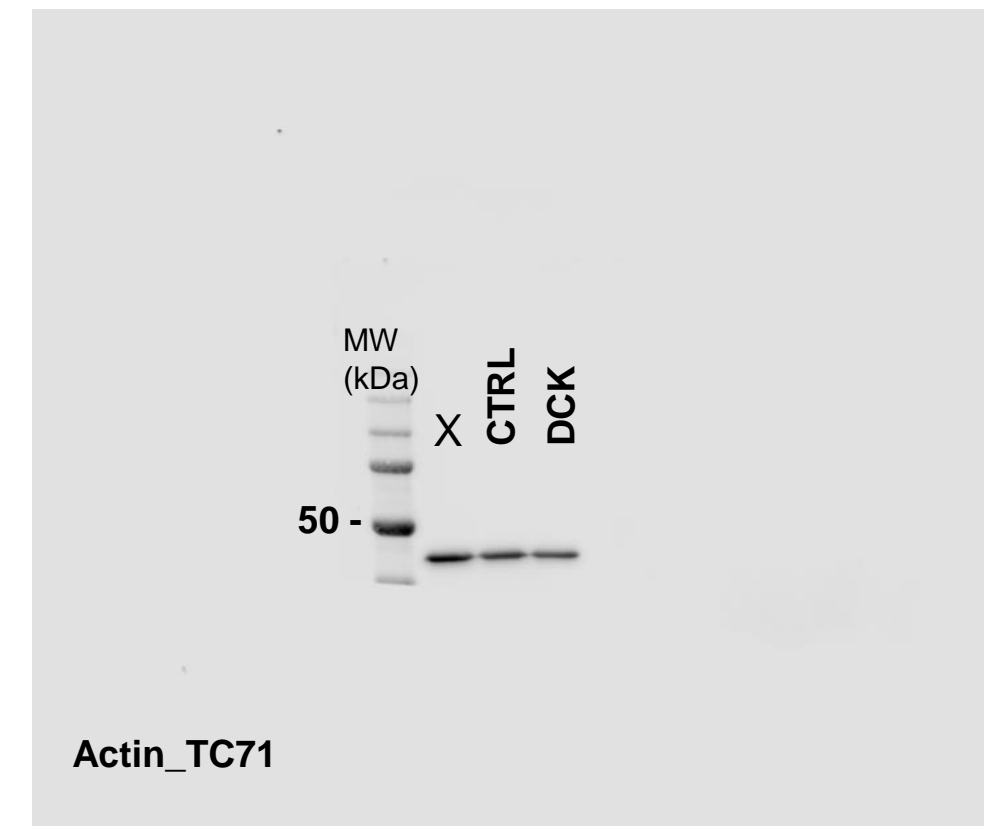

**Figure 3A**

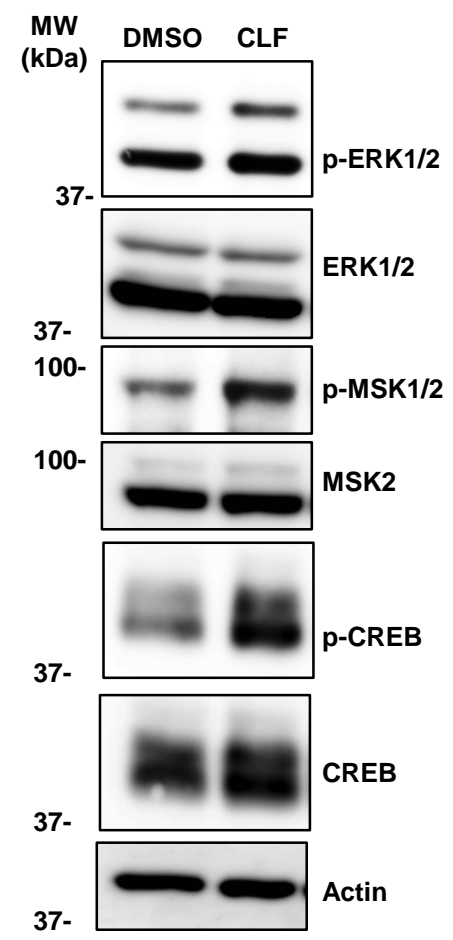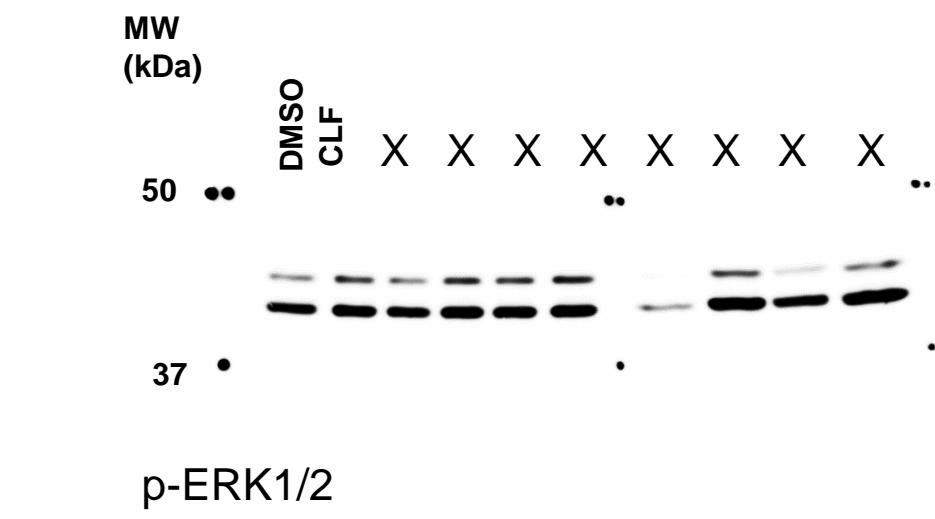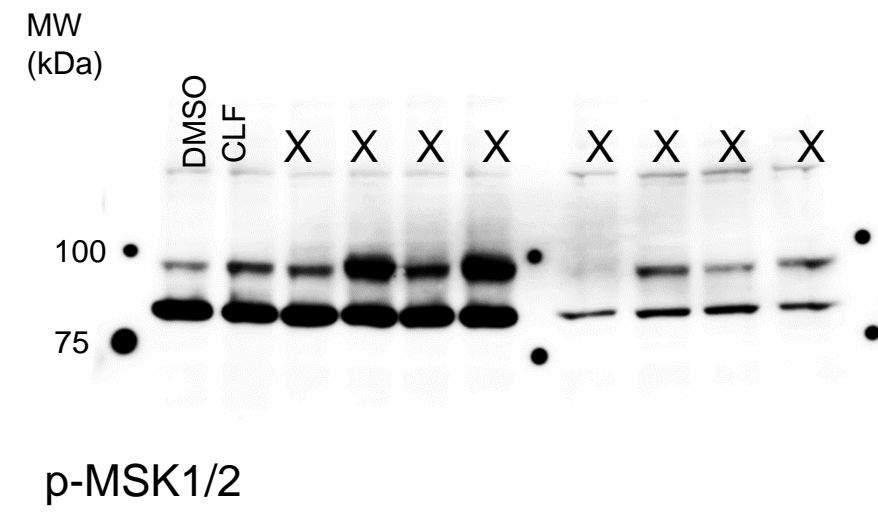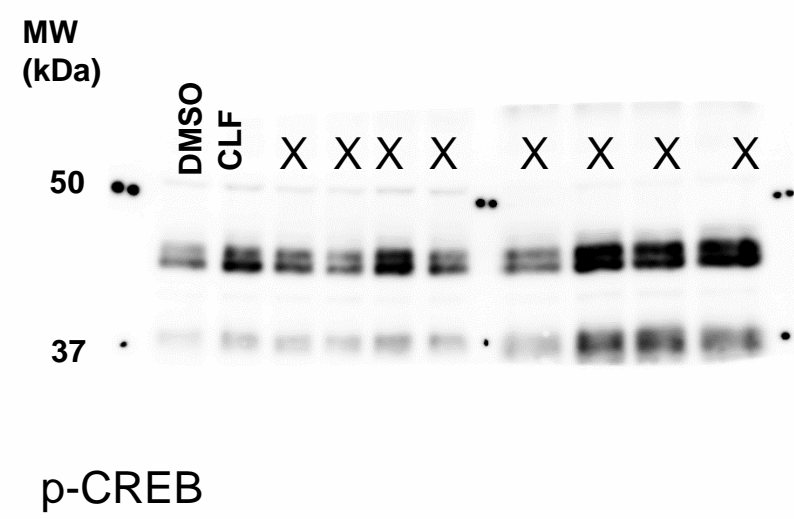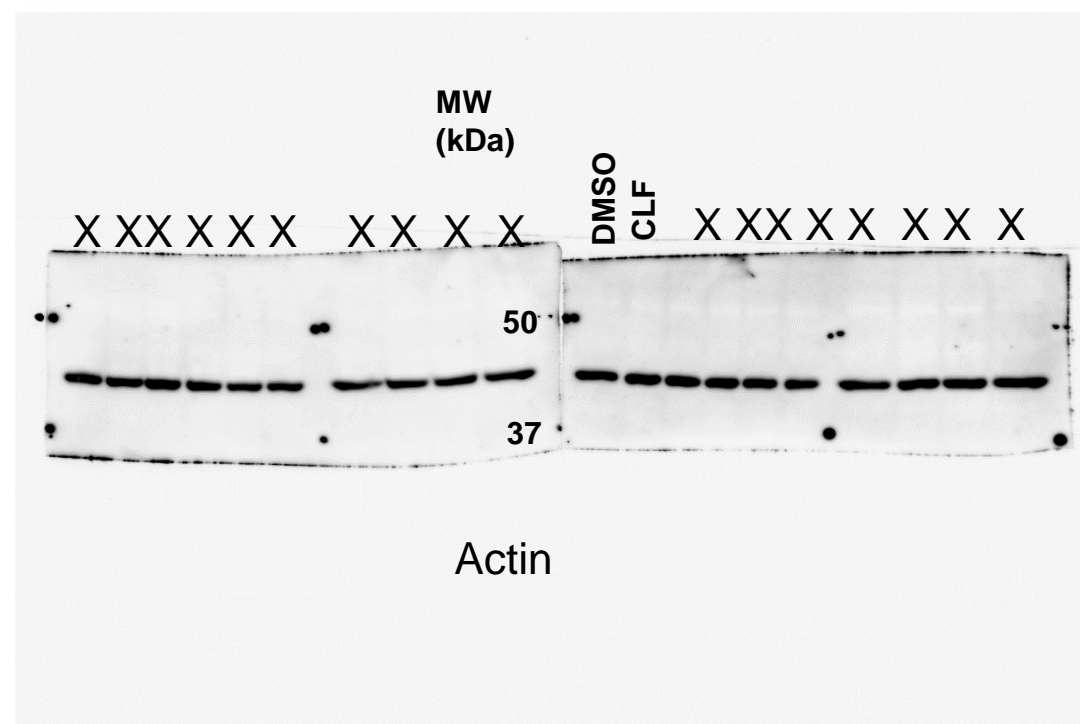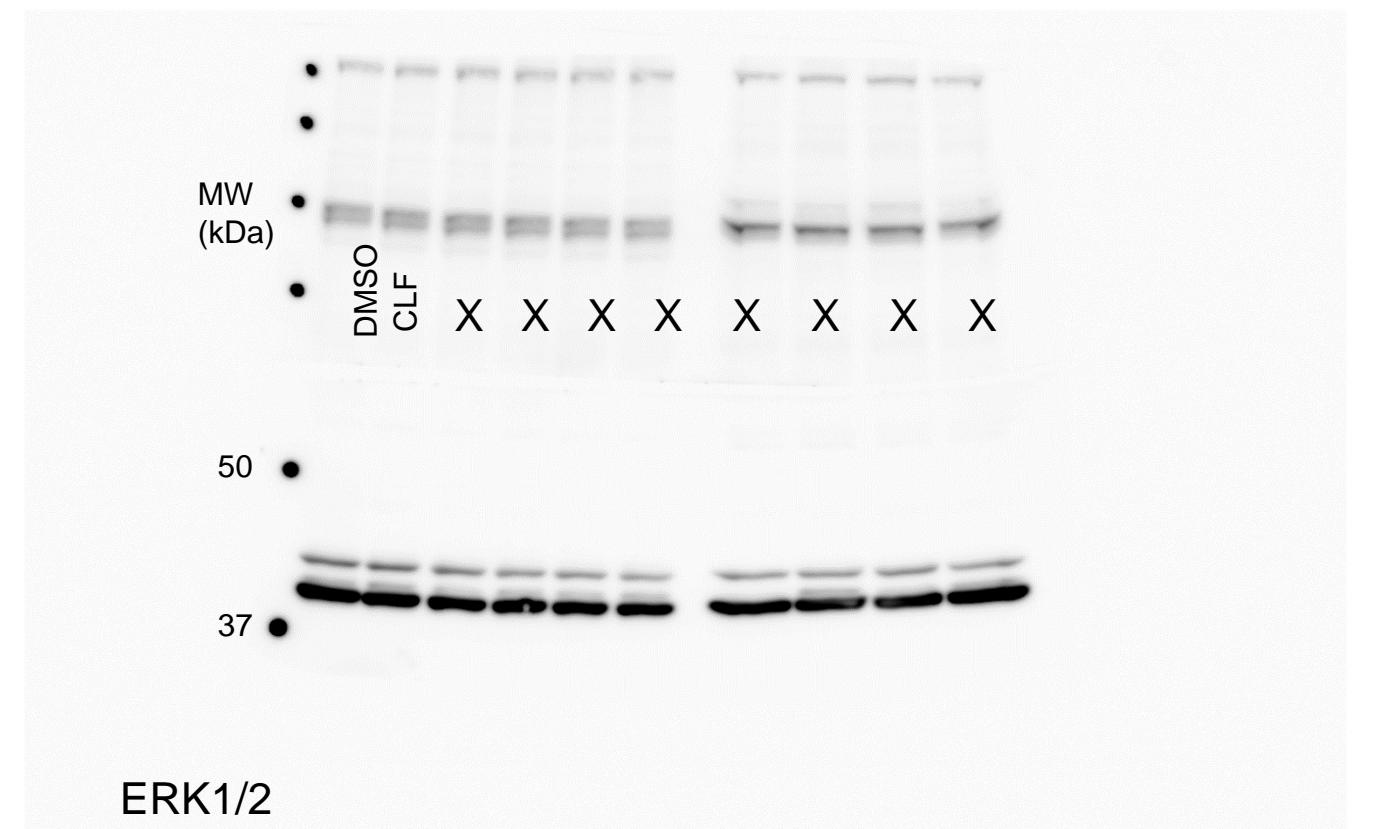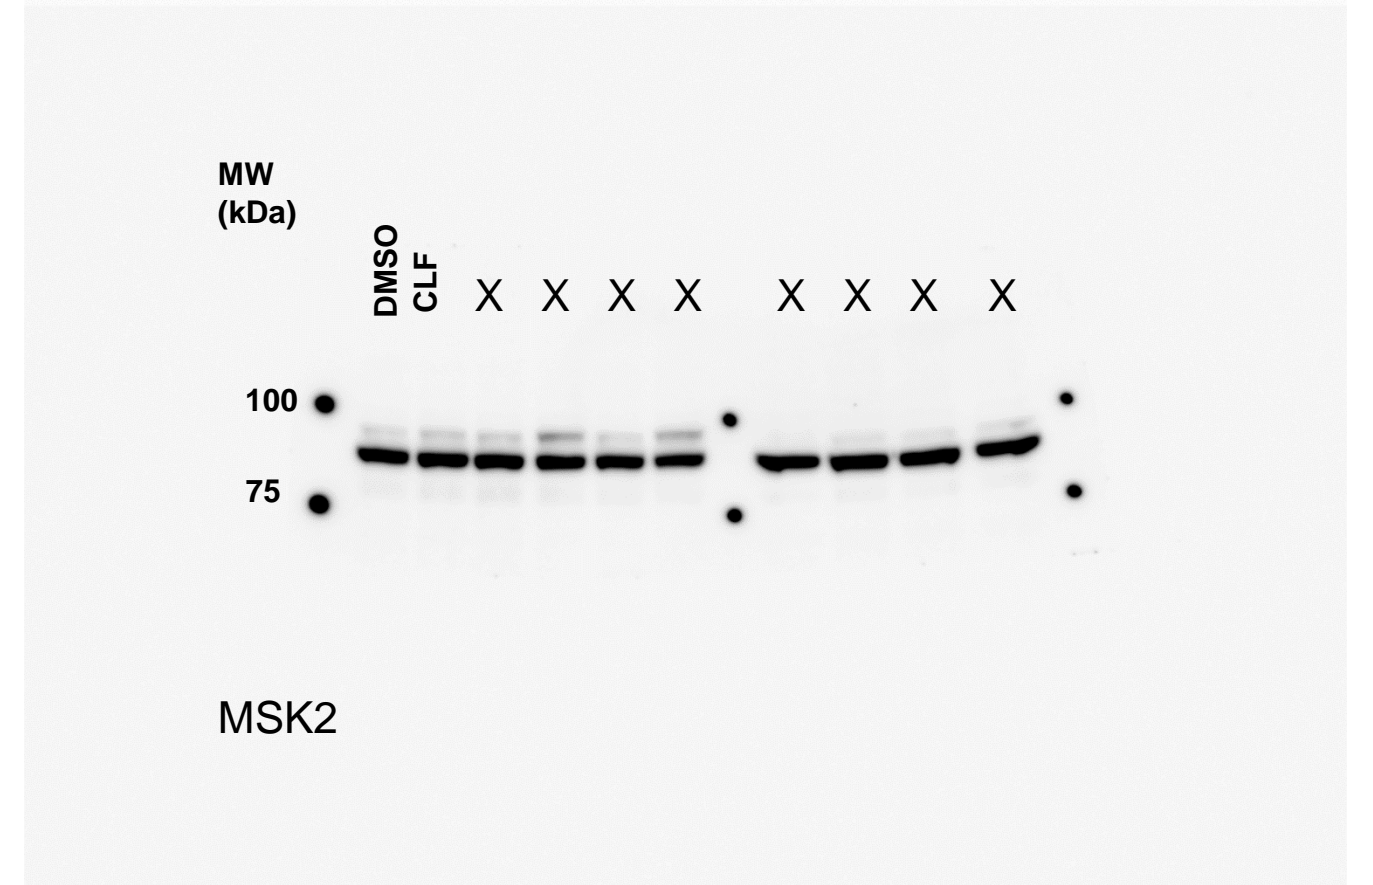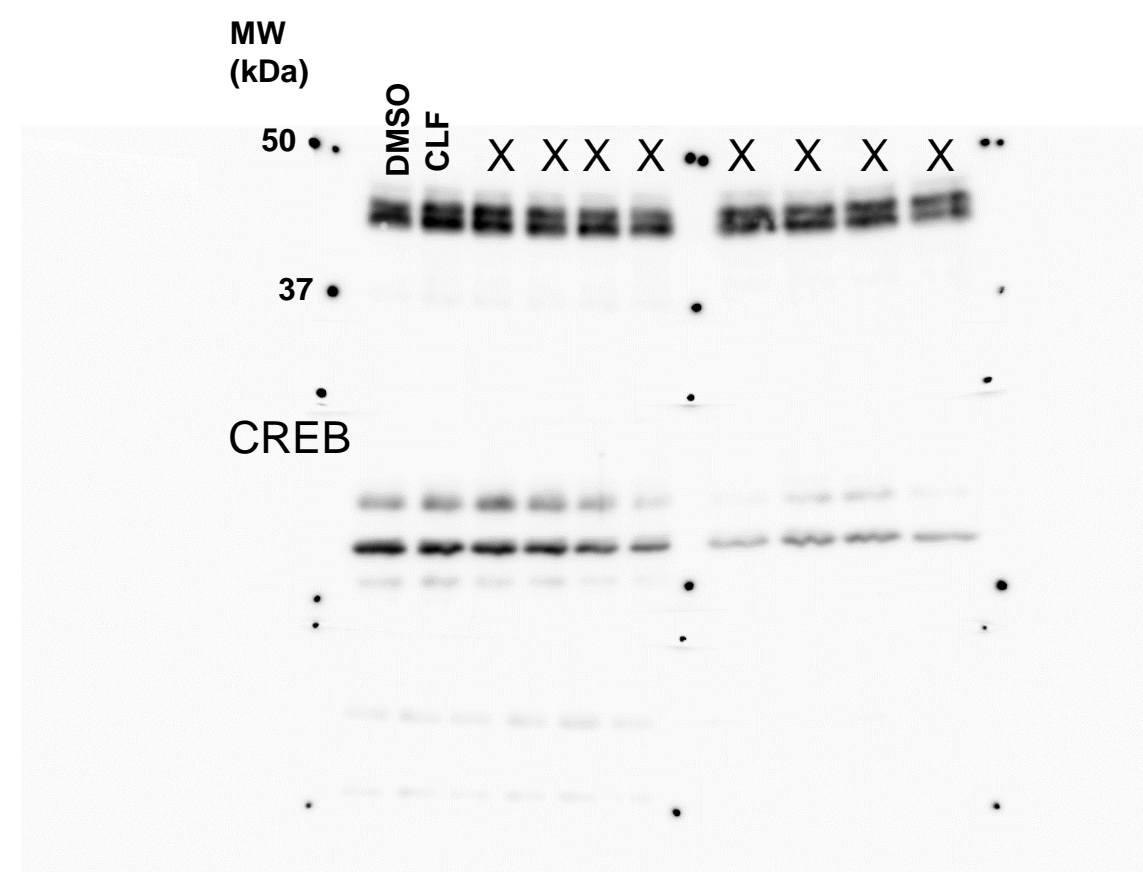

**Figure 3B**

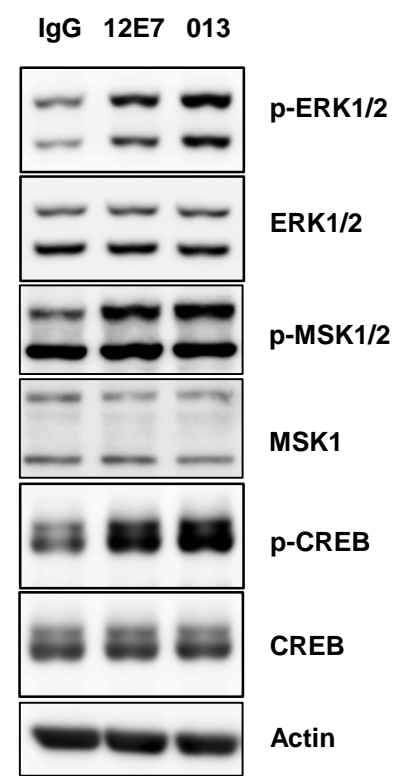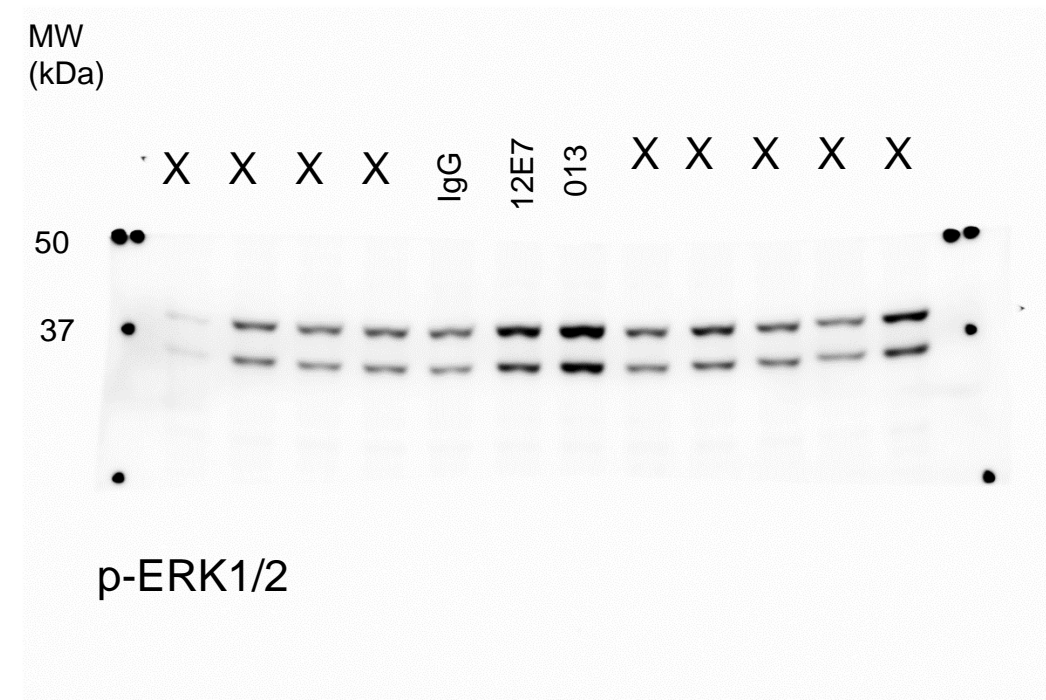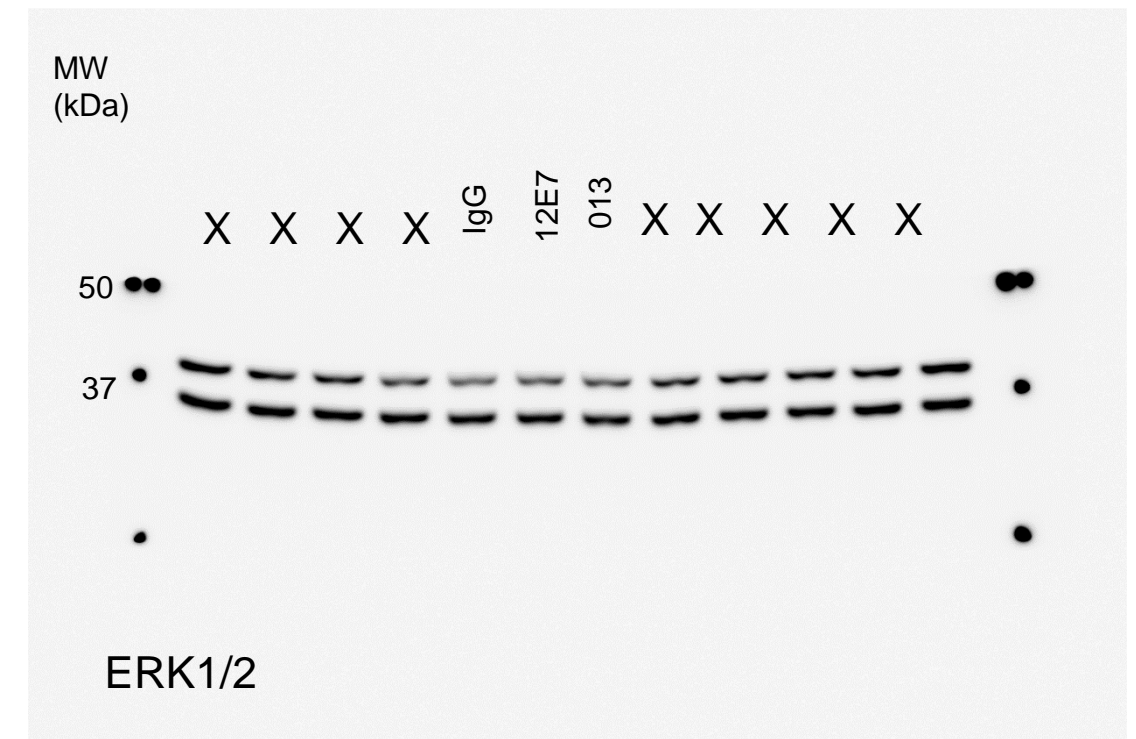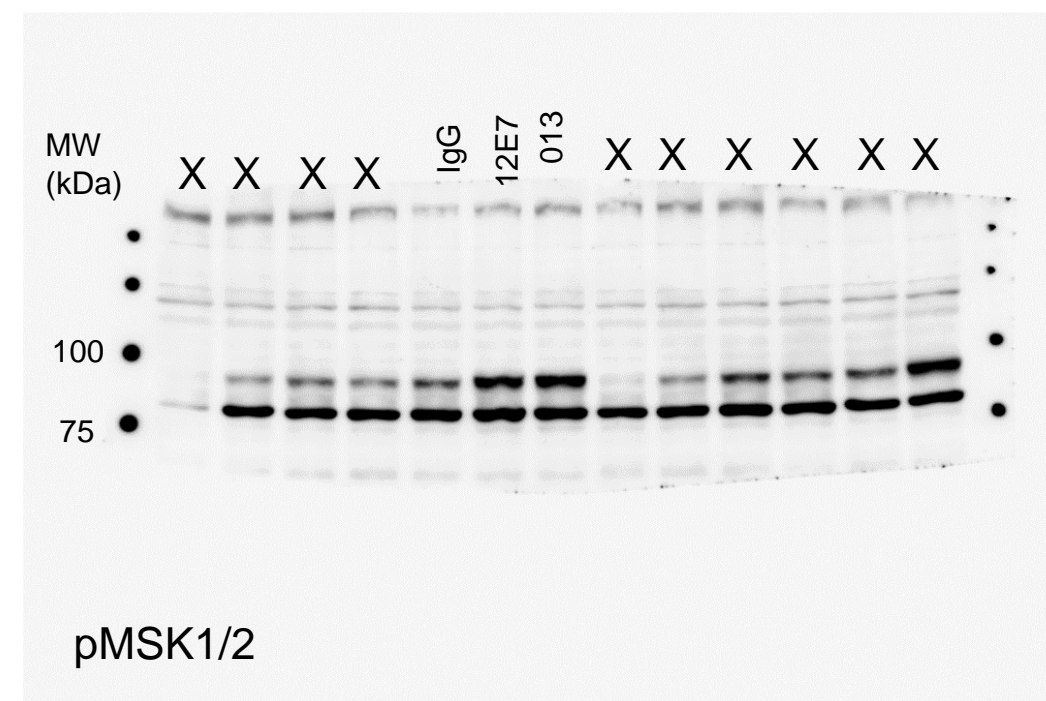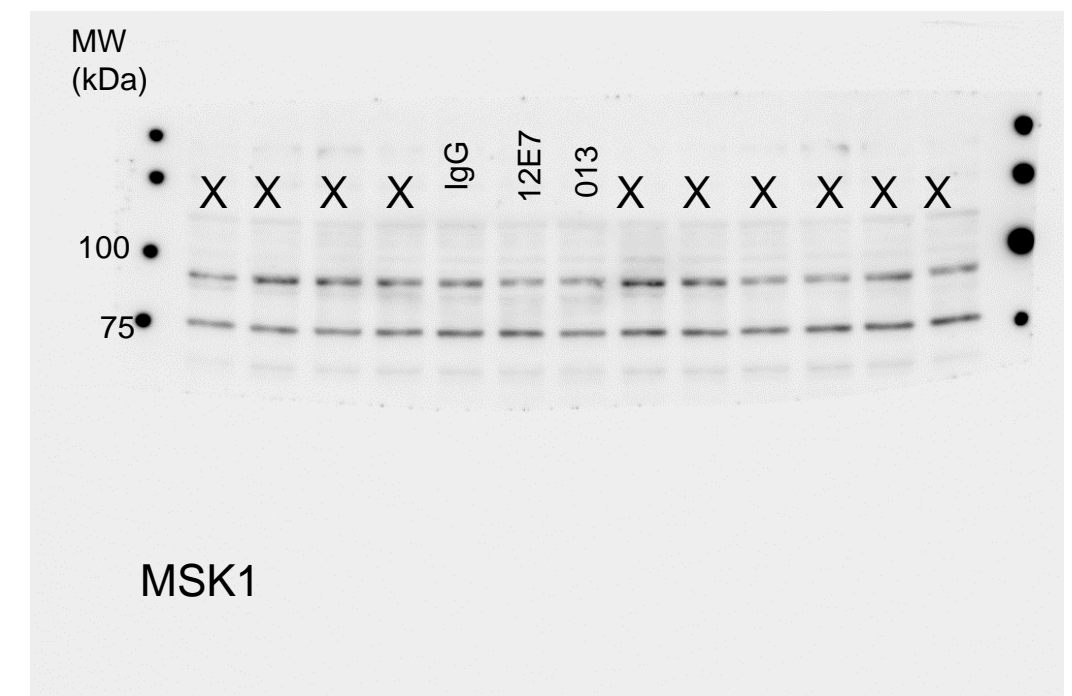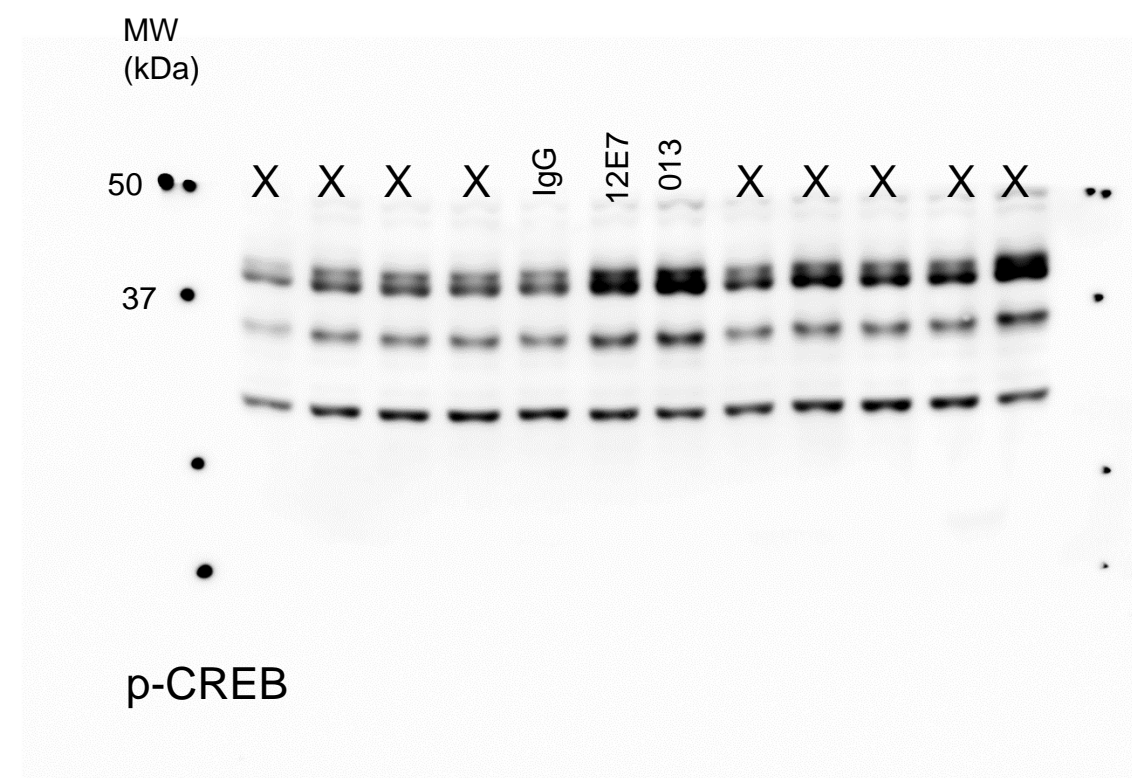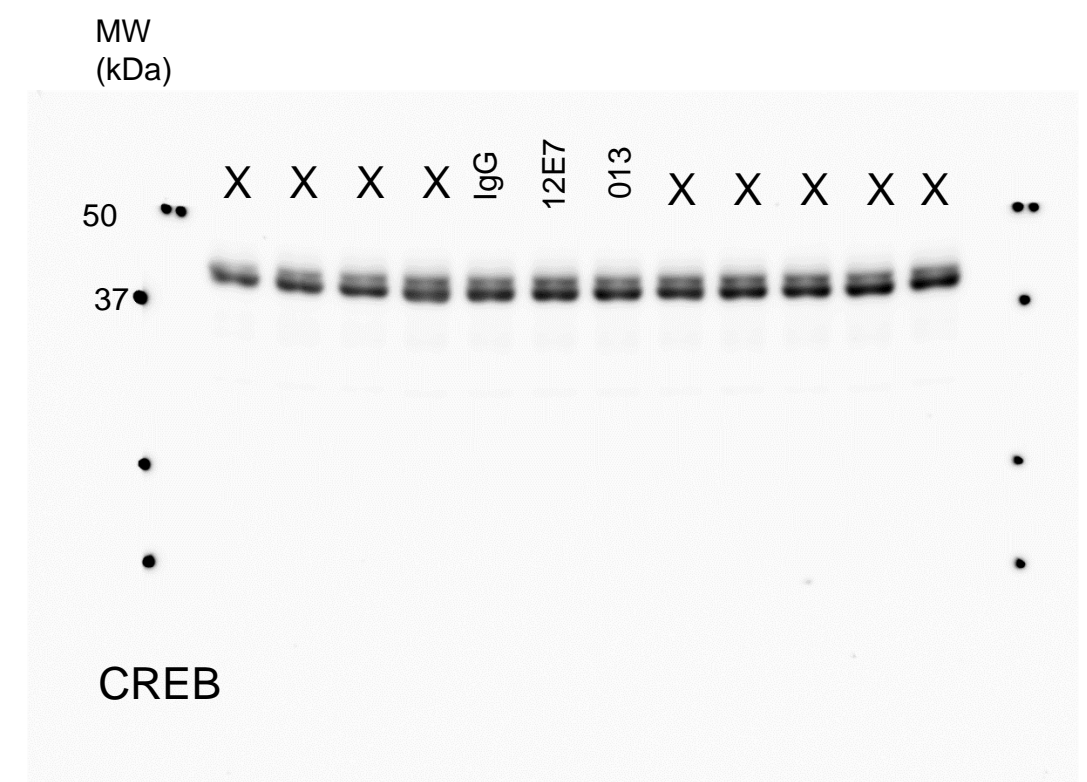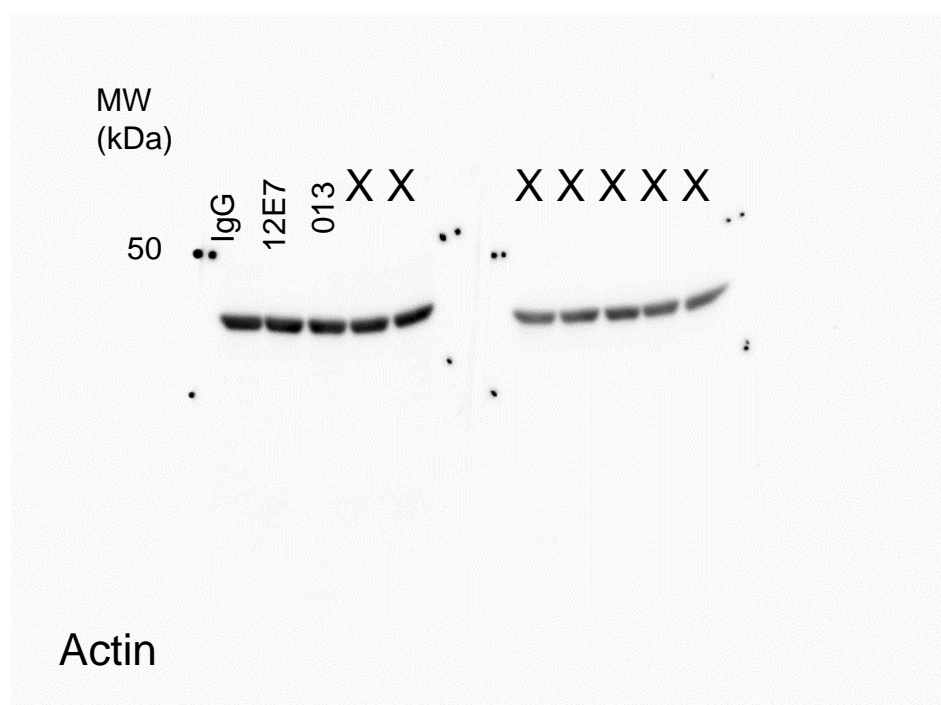



**Figure 3D**

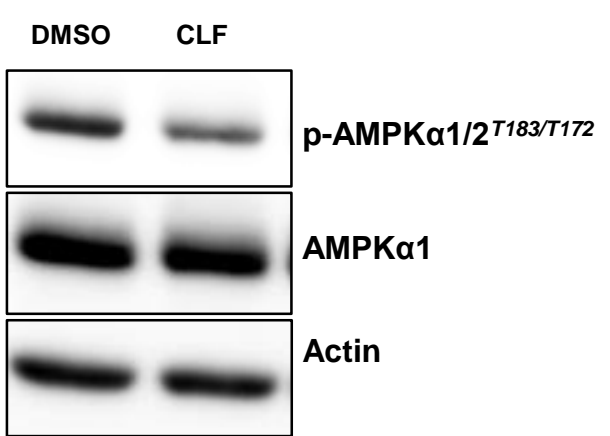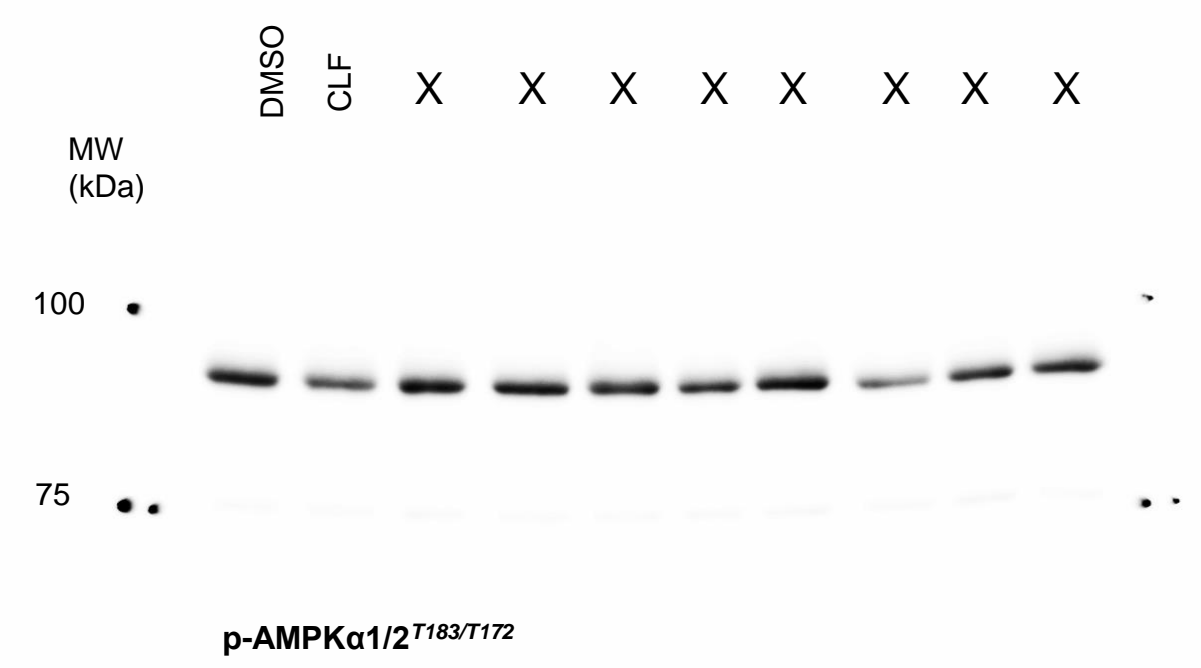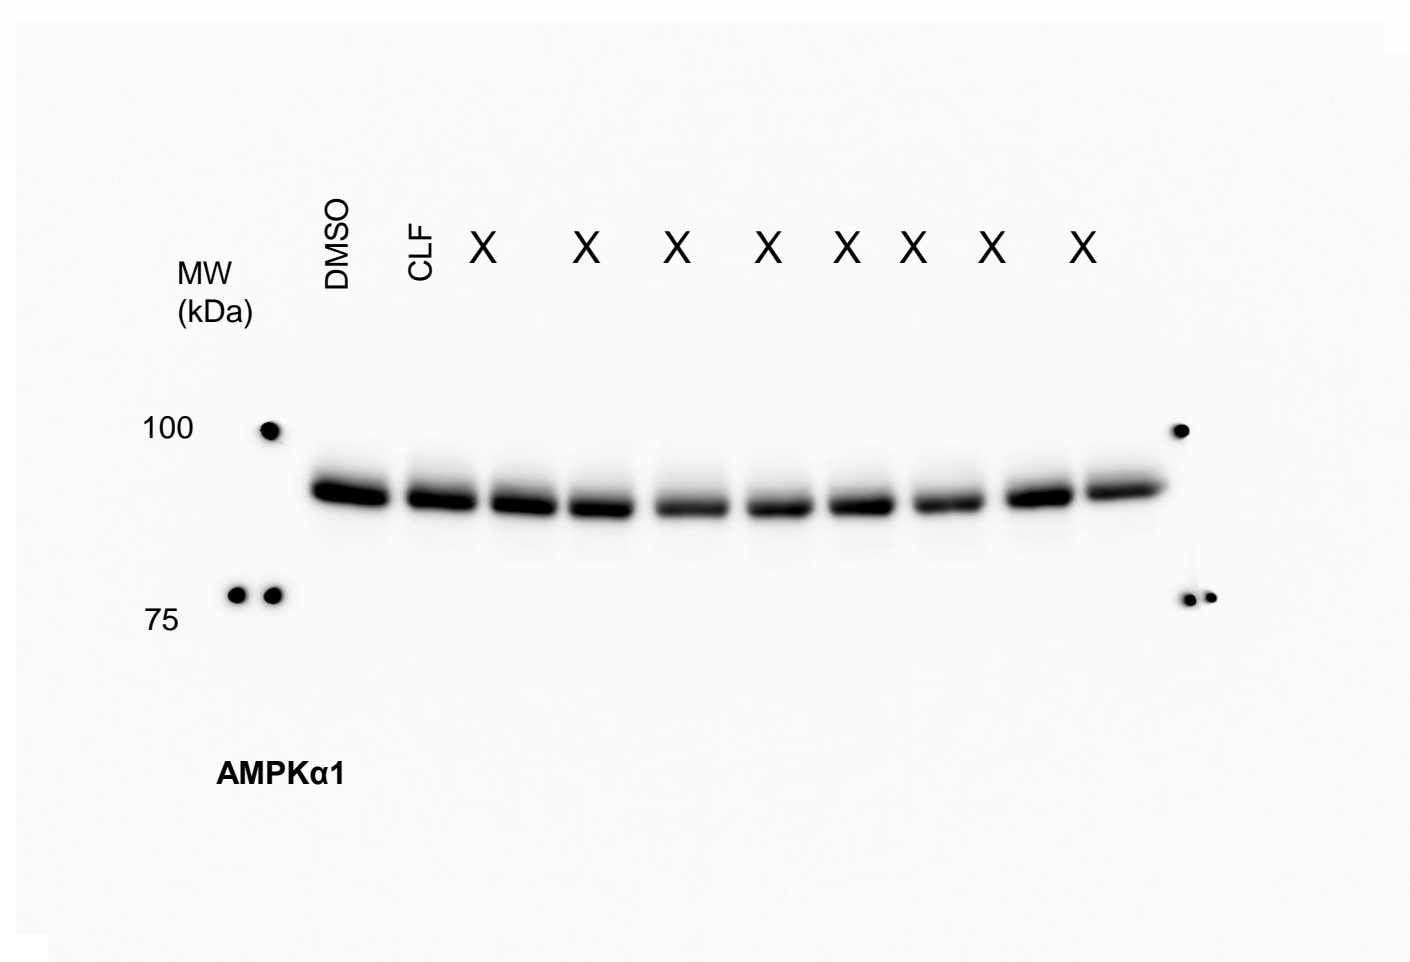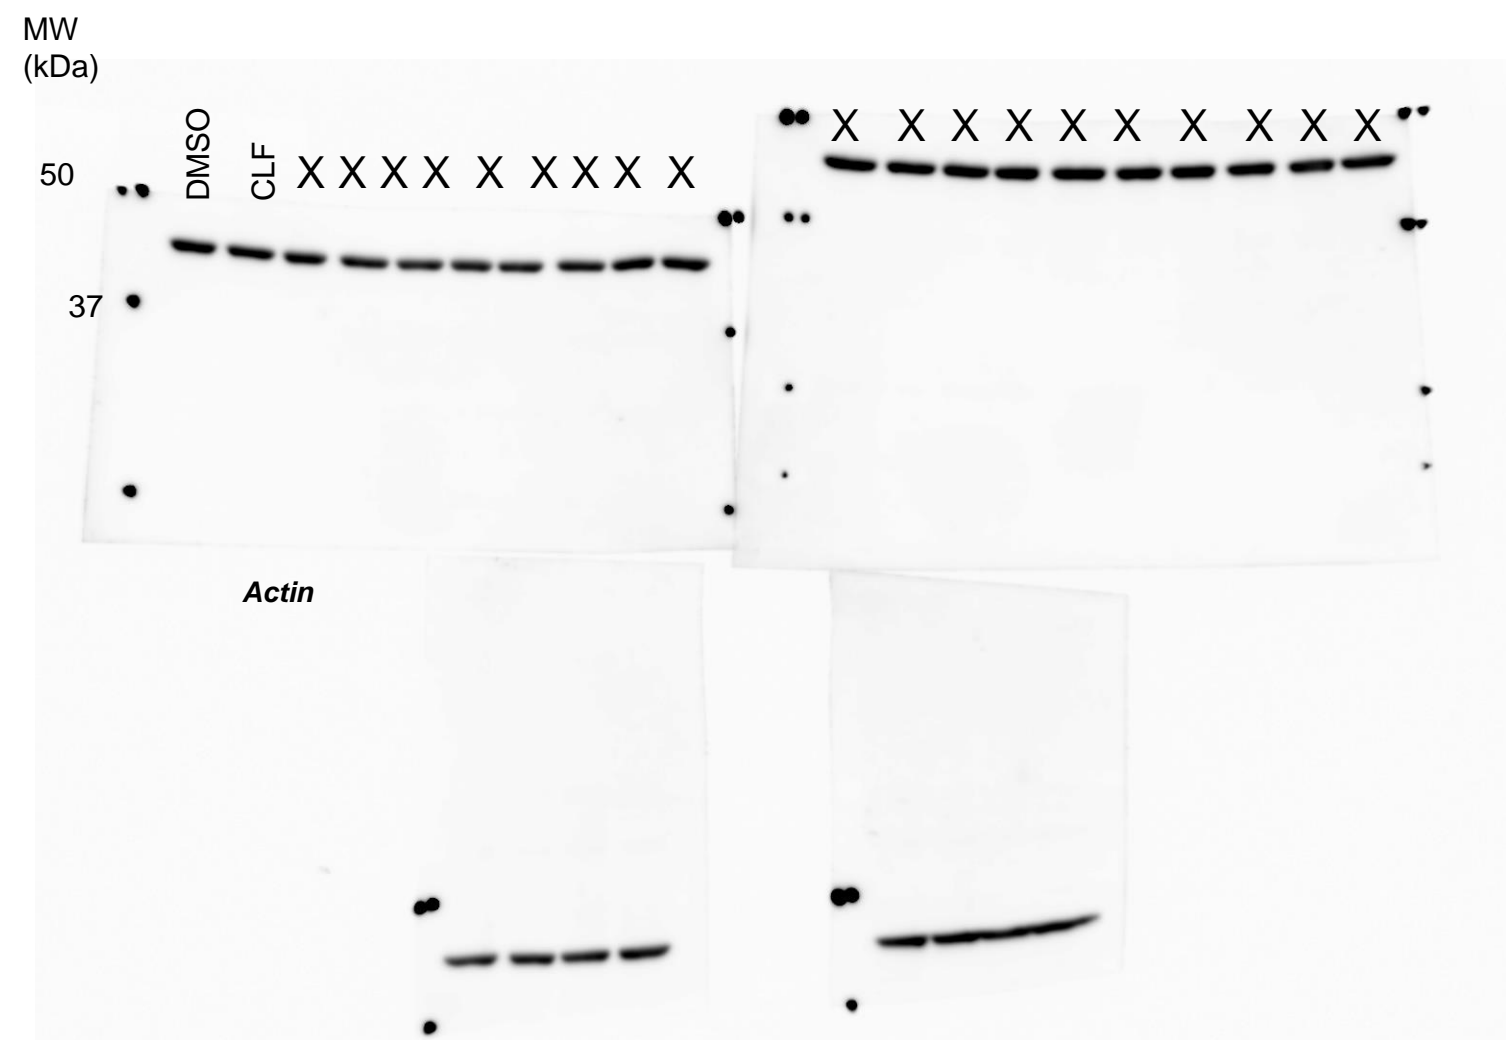

**Figure 3E**

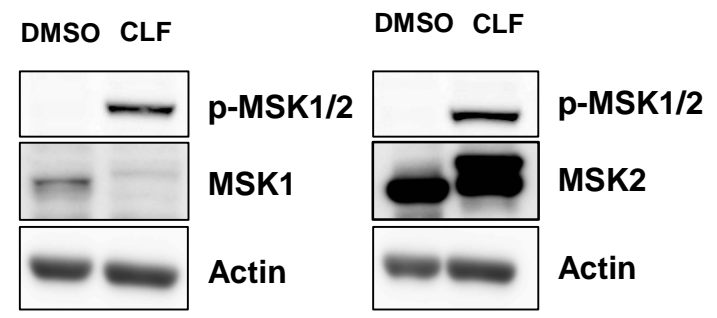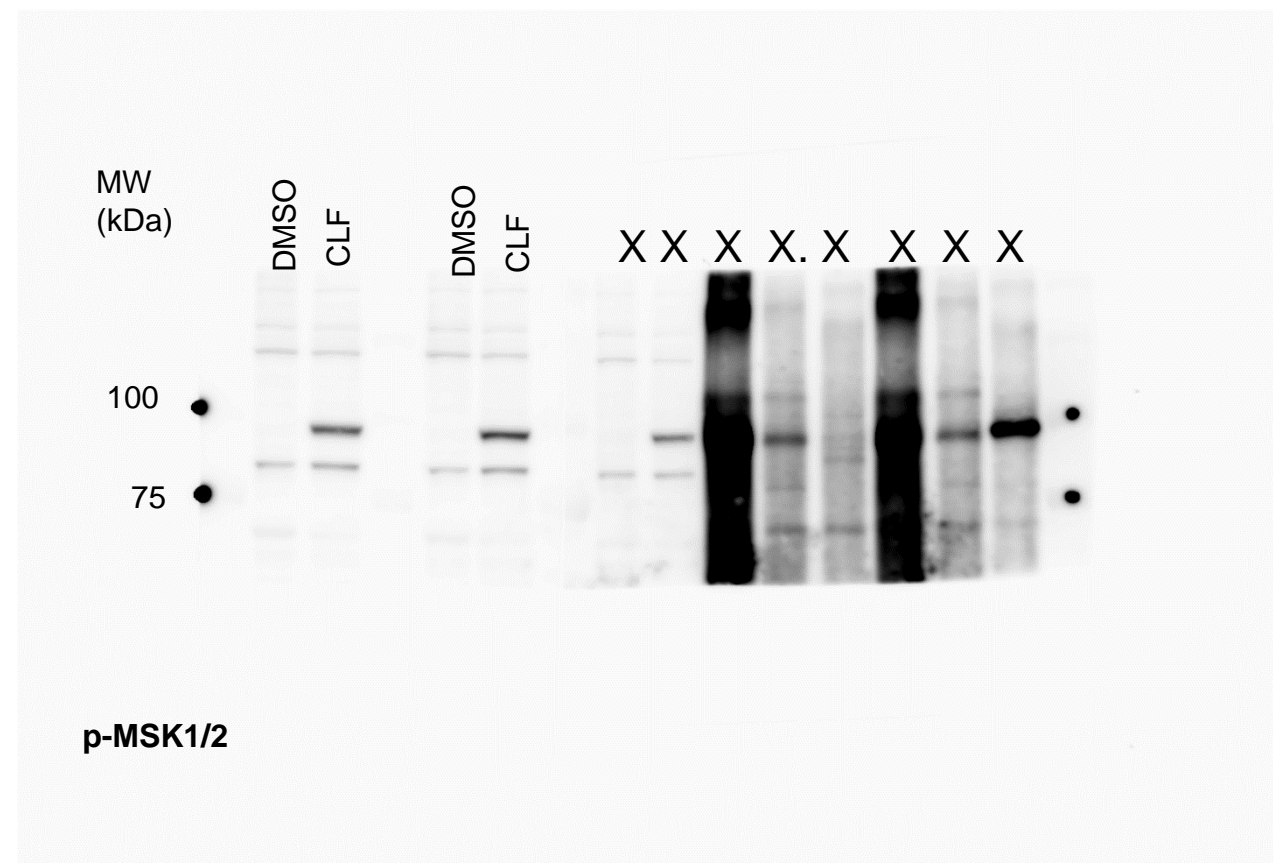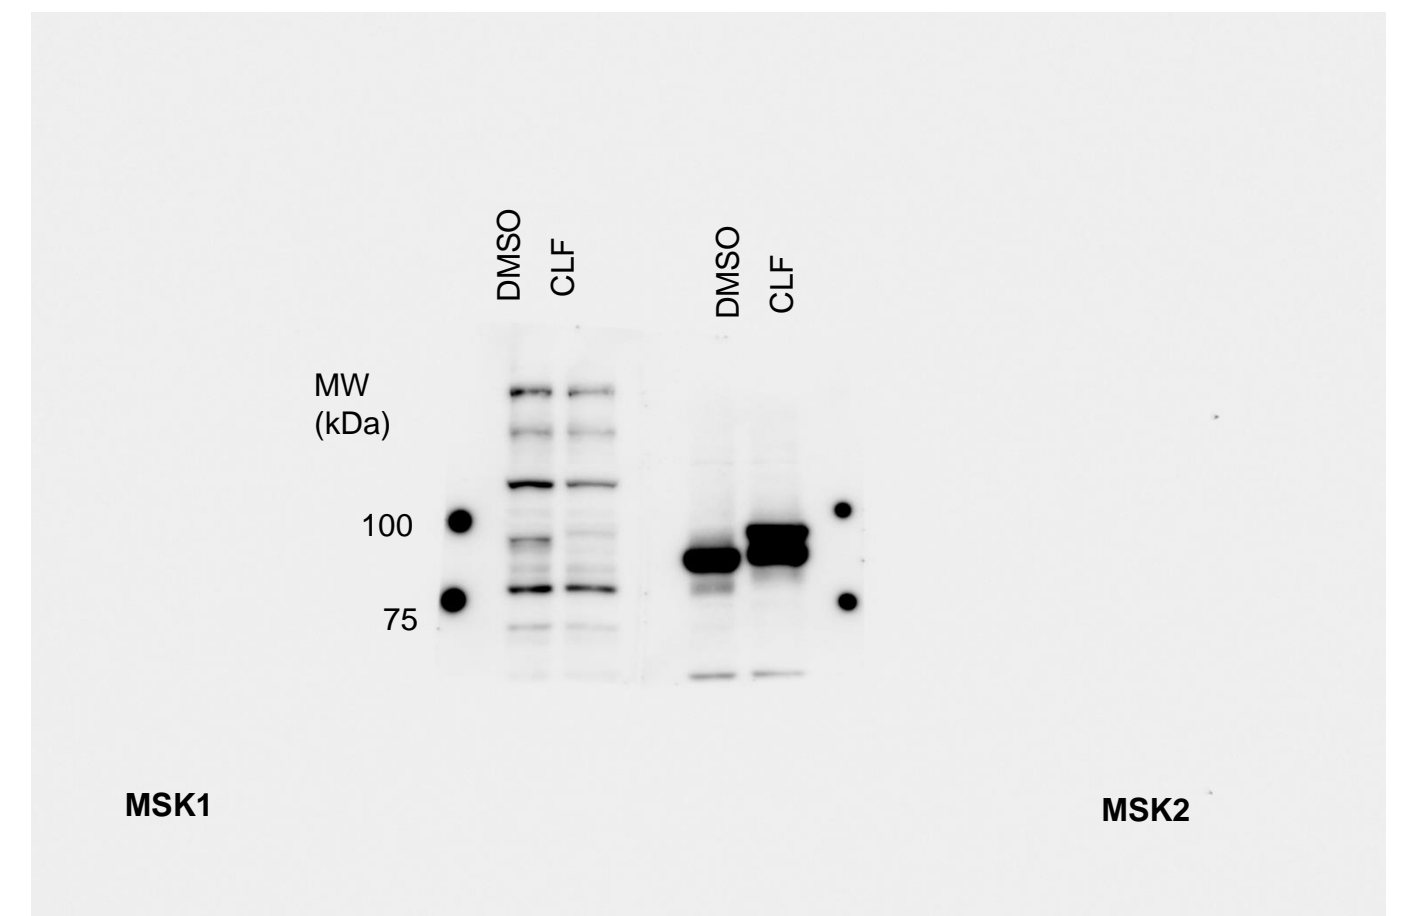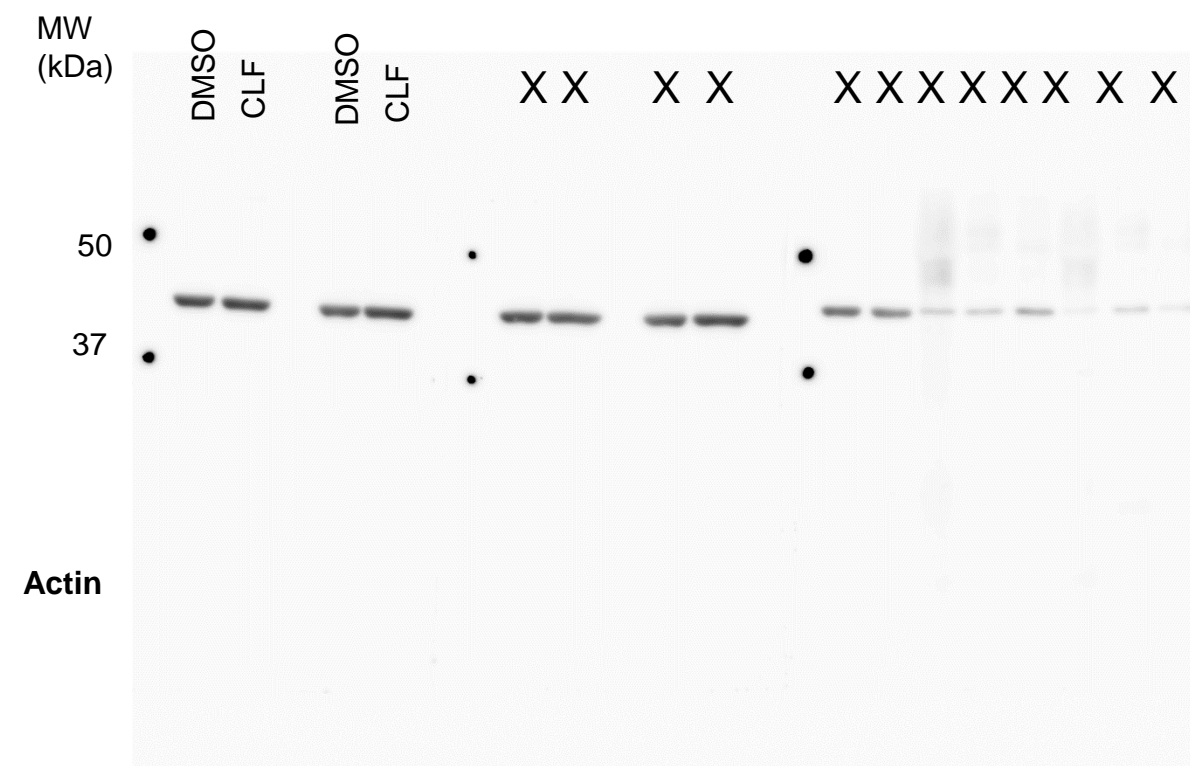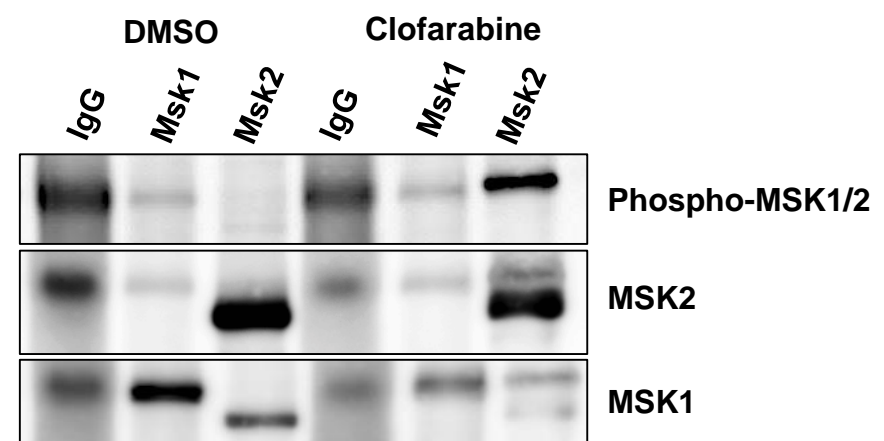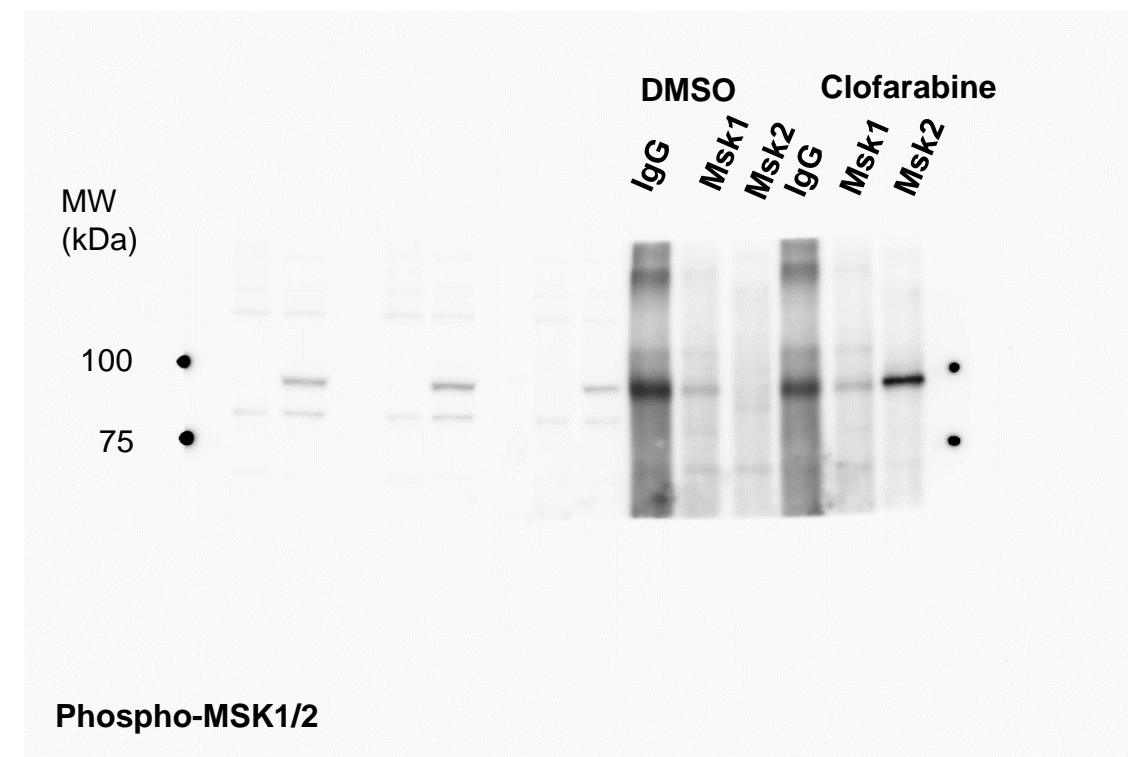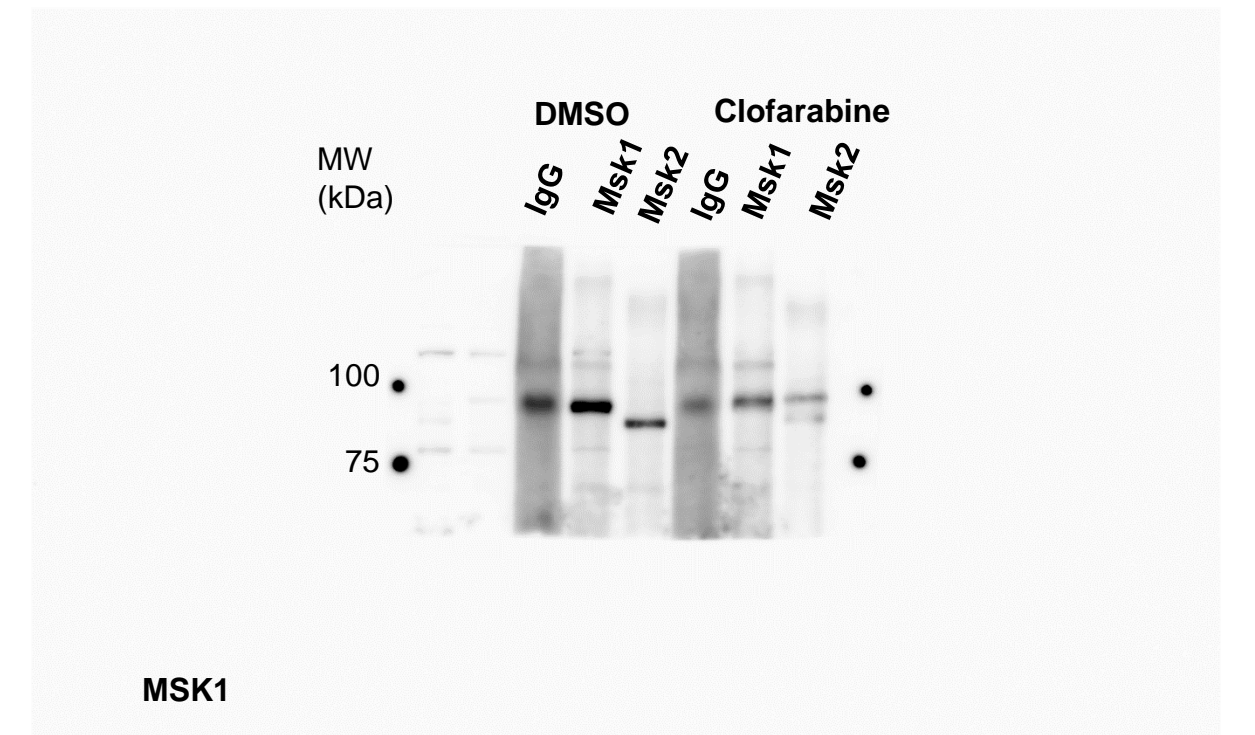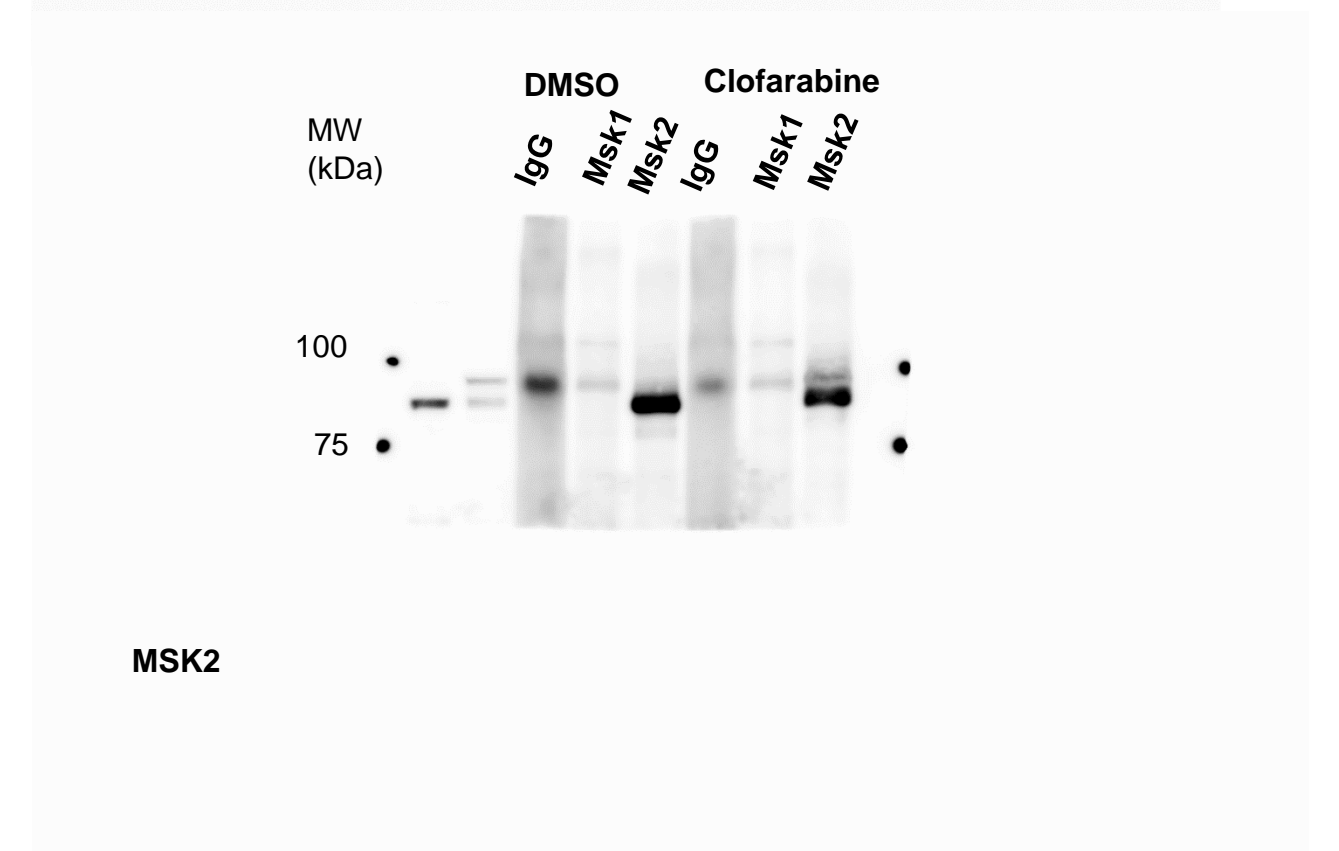

**Figure 4A**

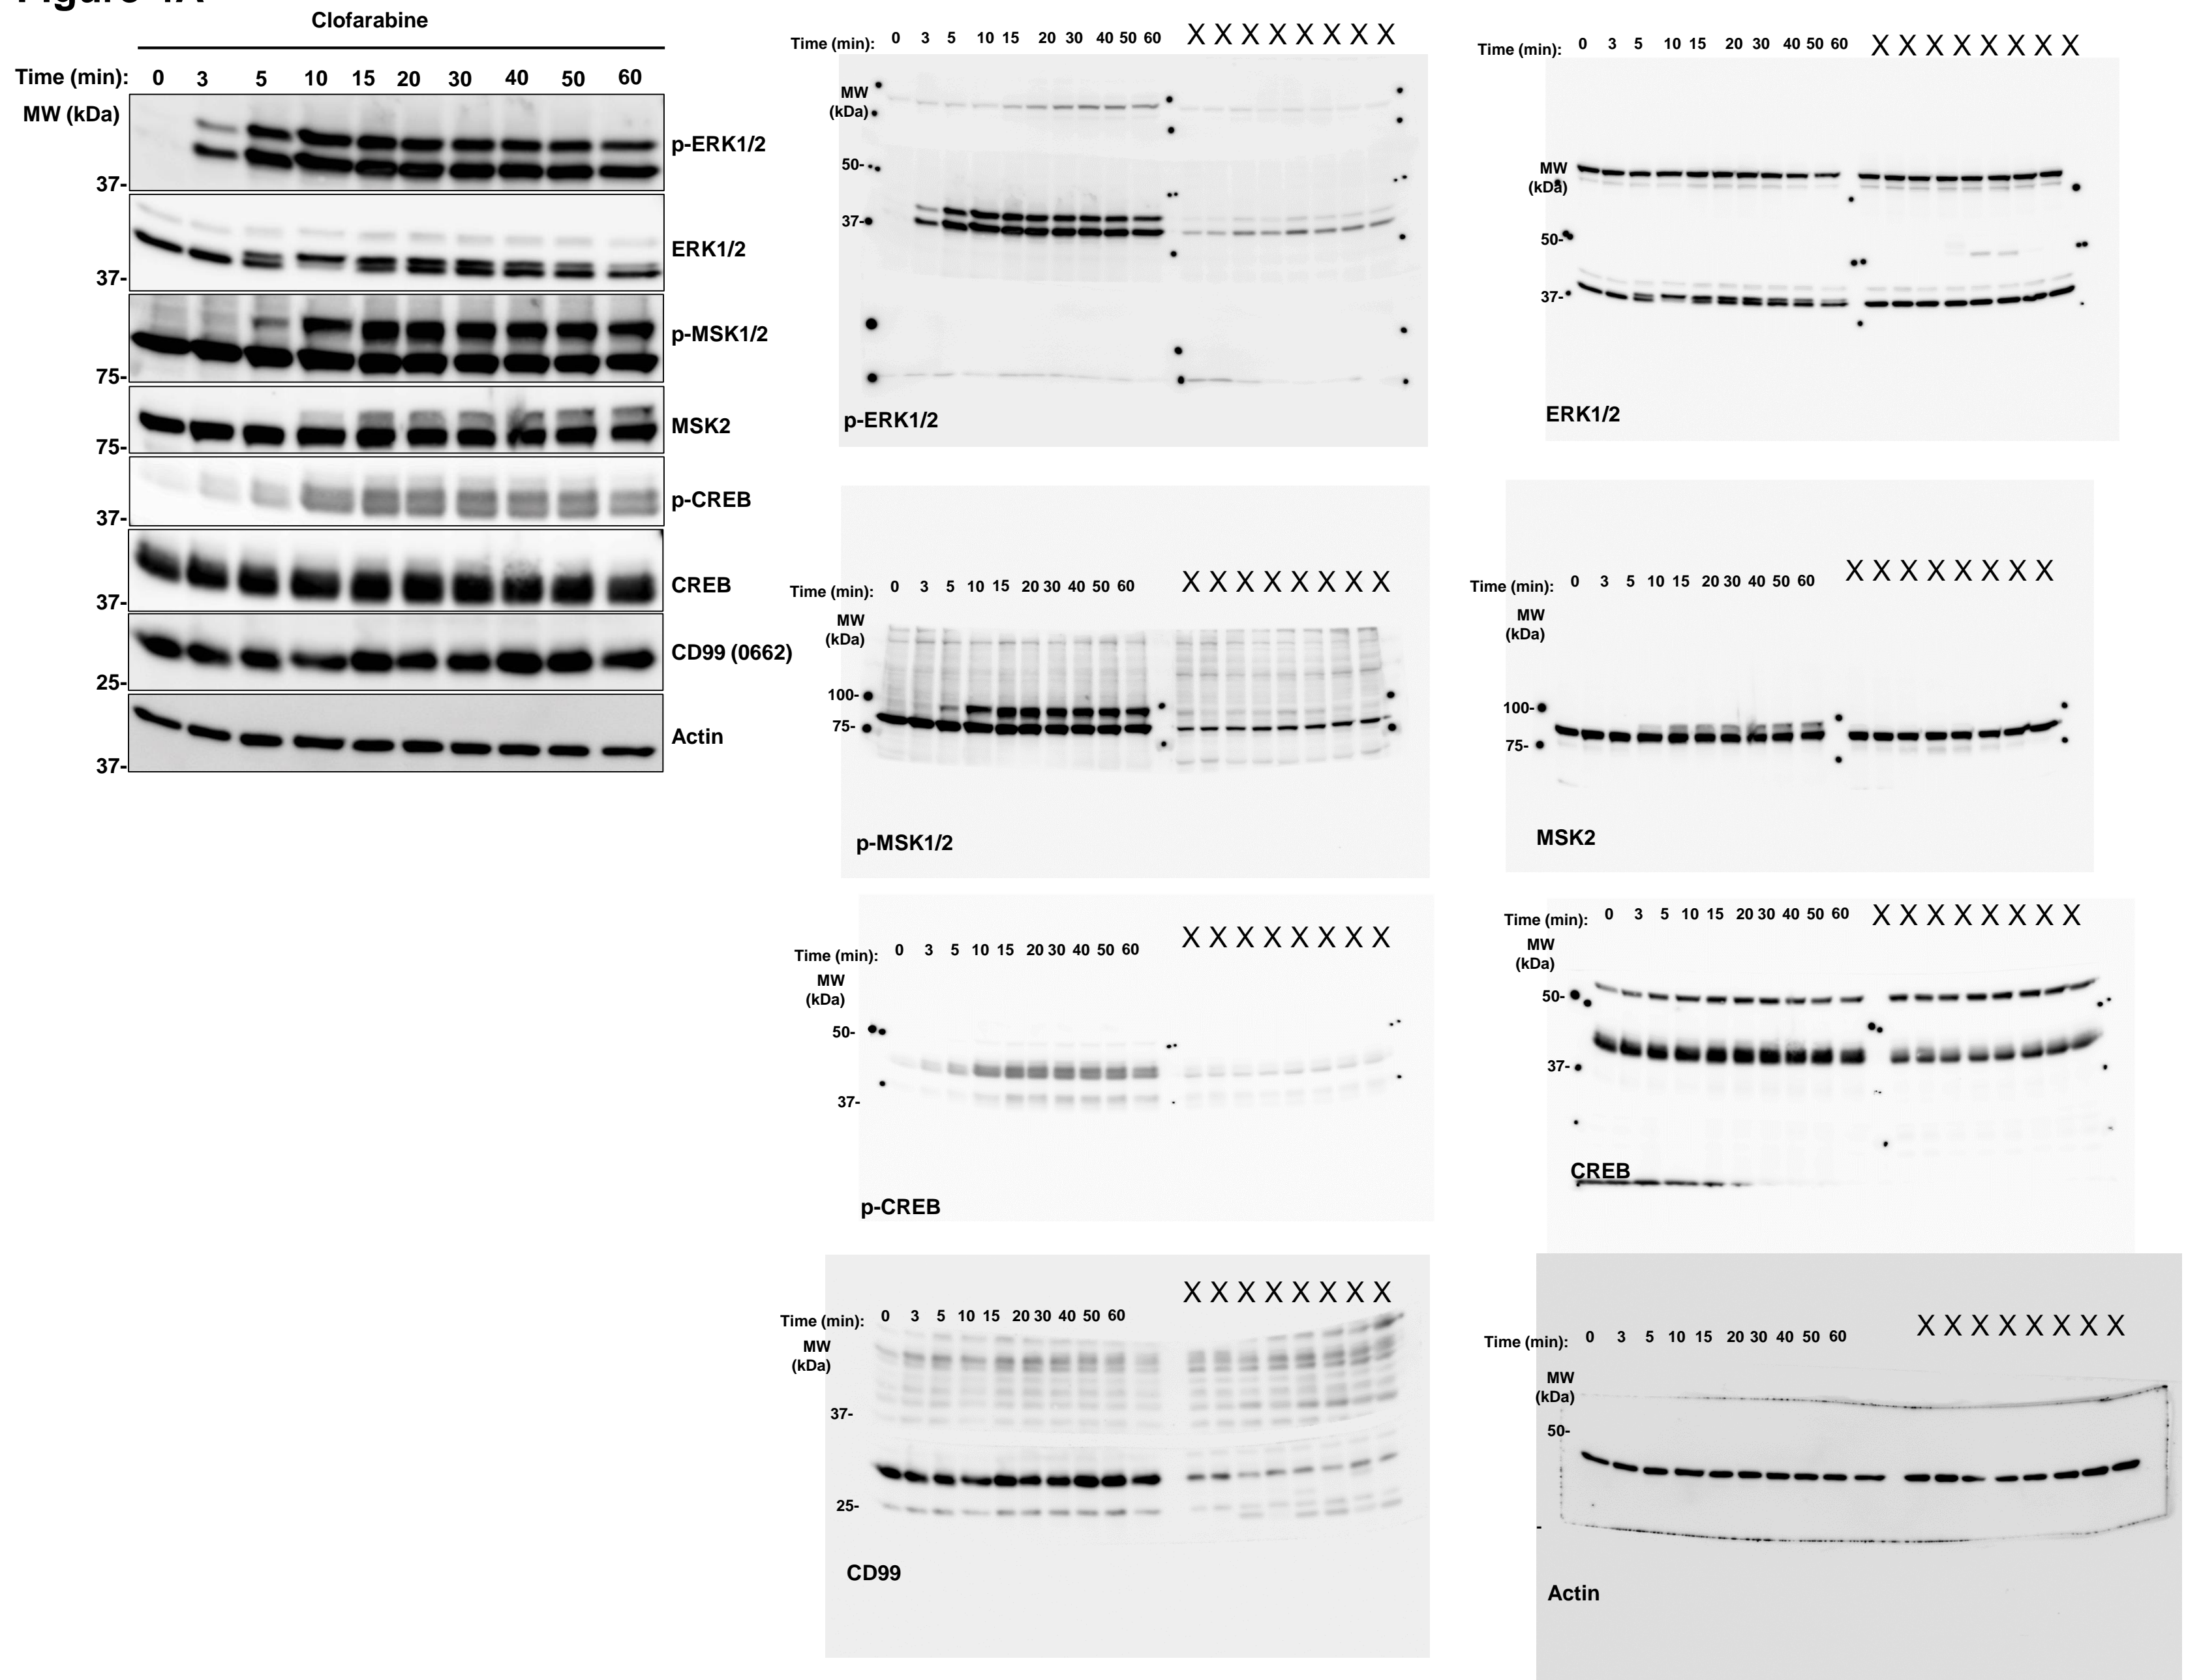



**Figure 4B**

Clofarabine

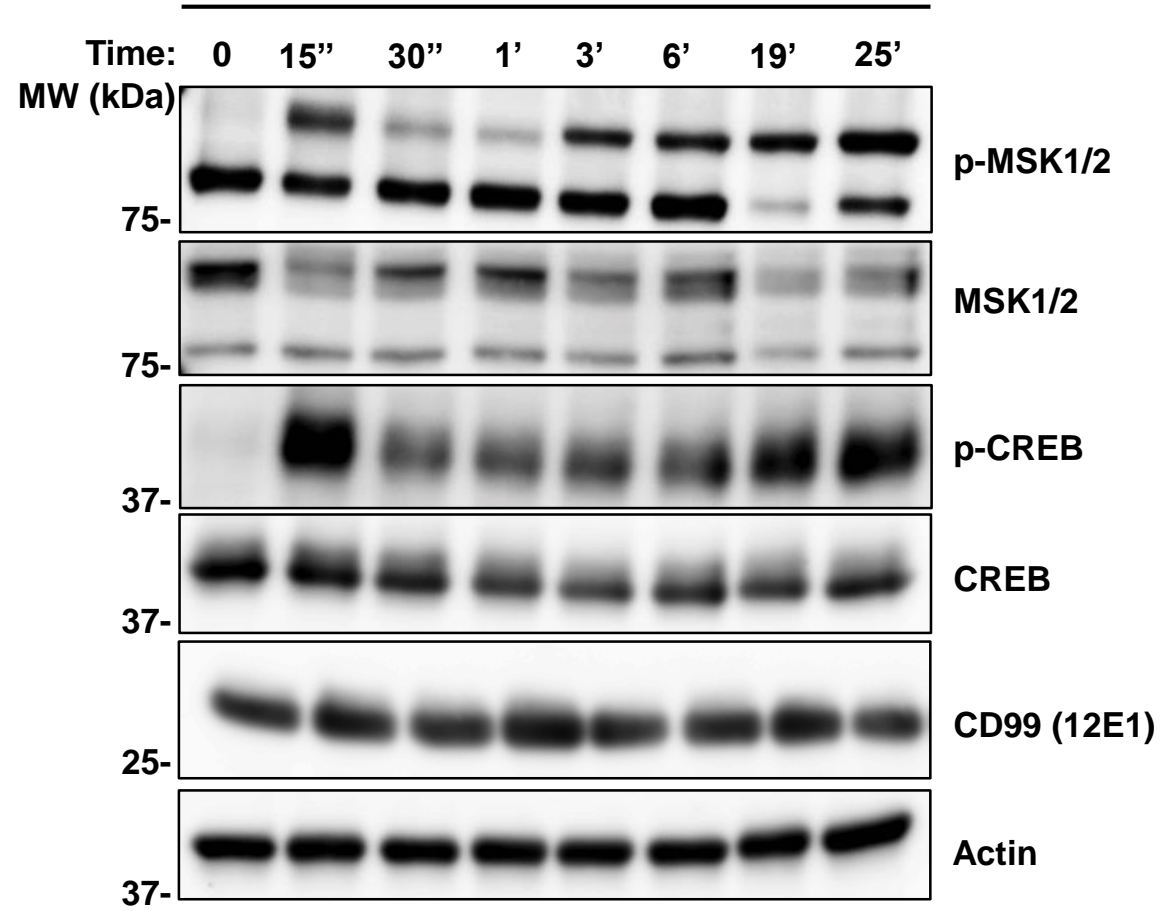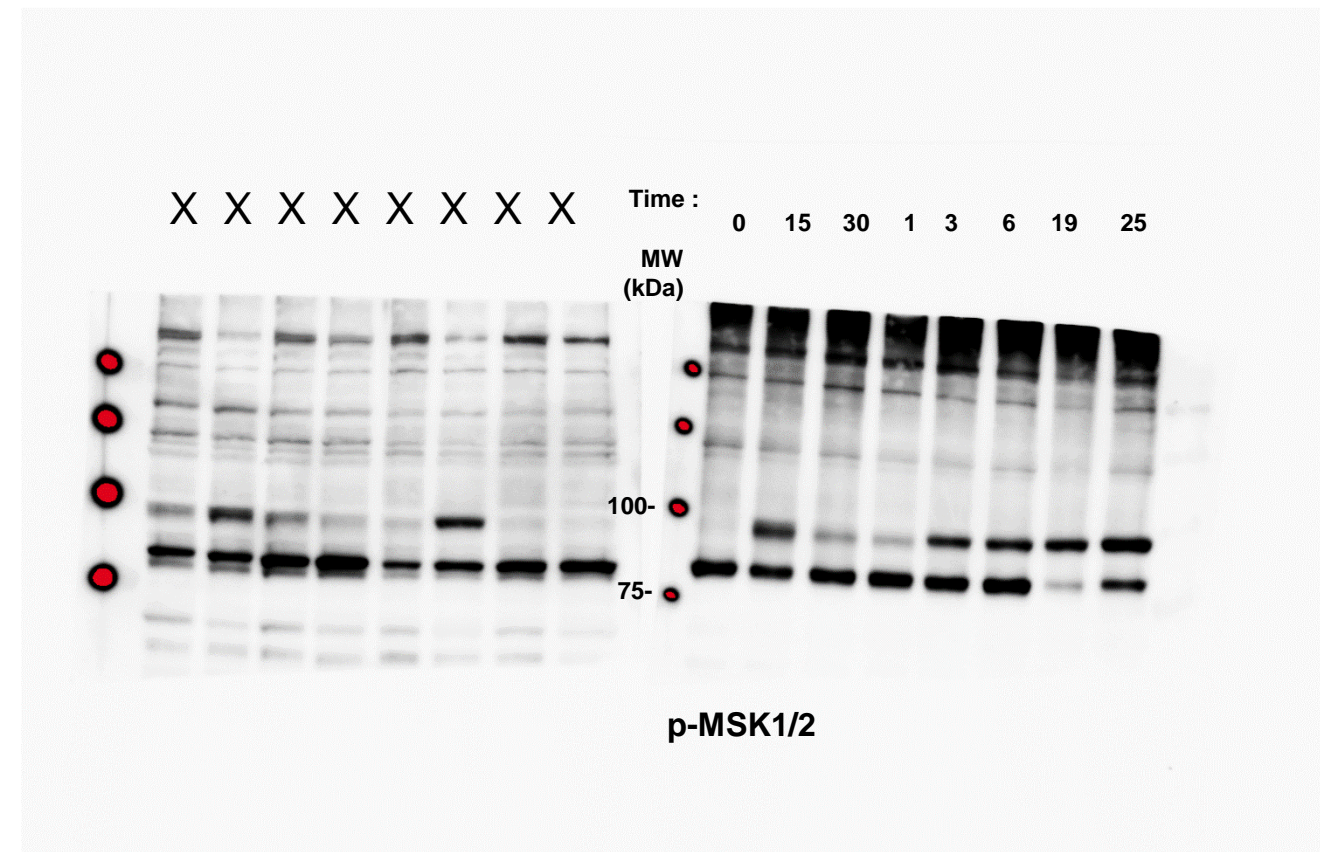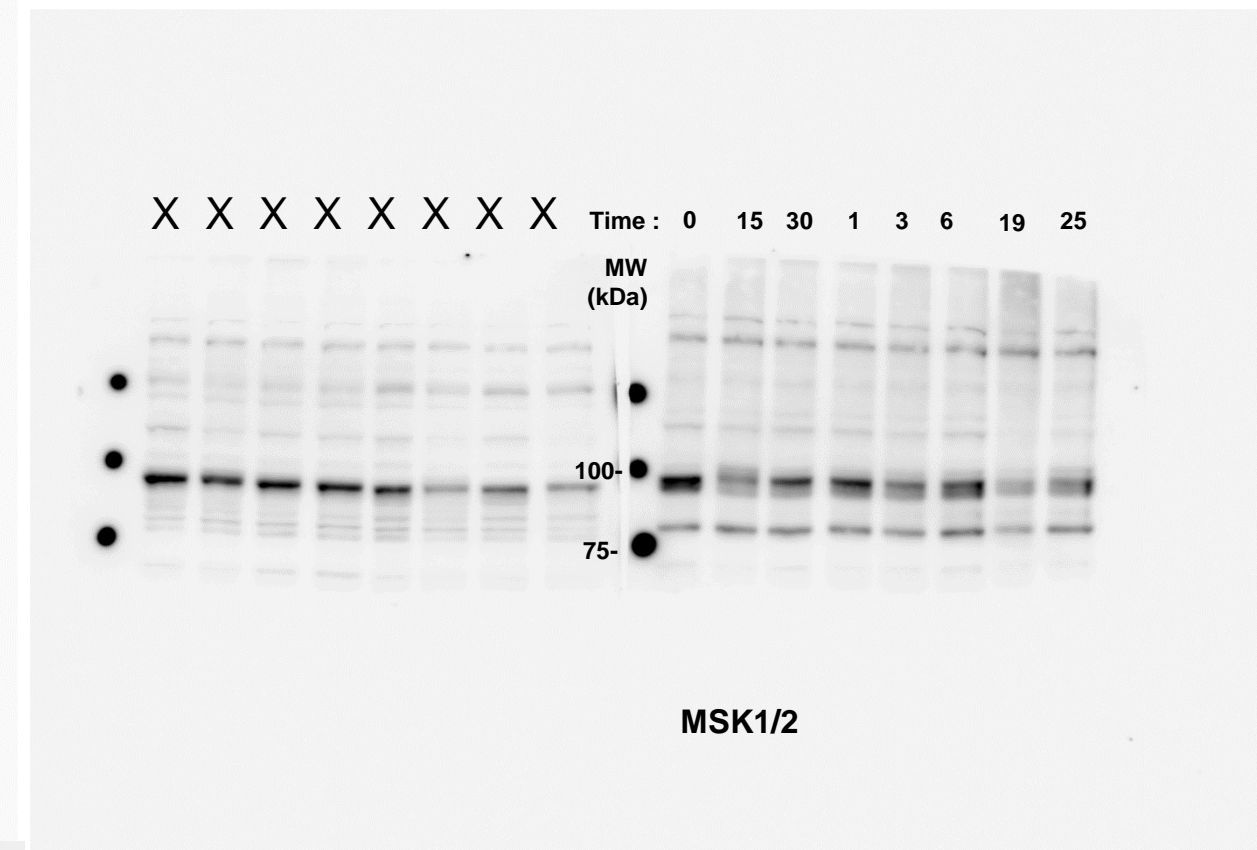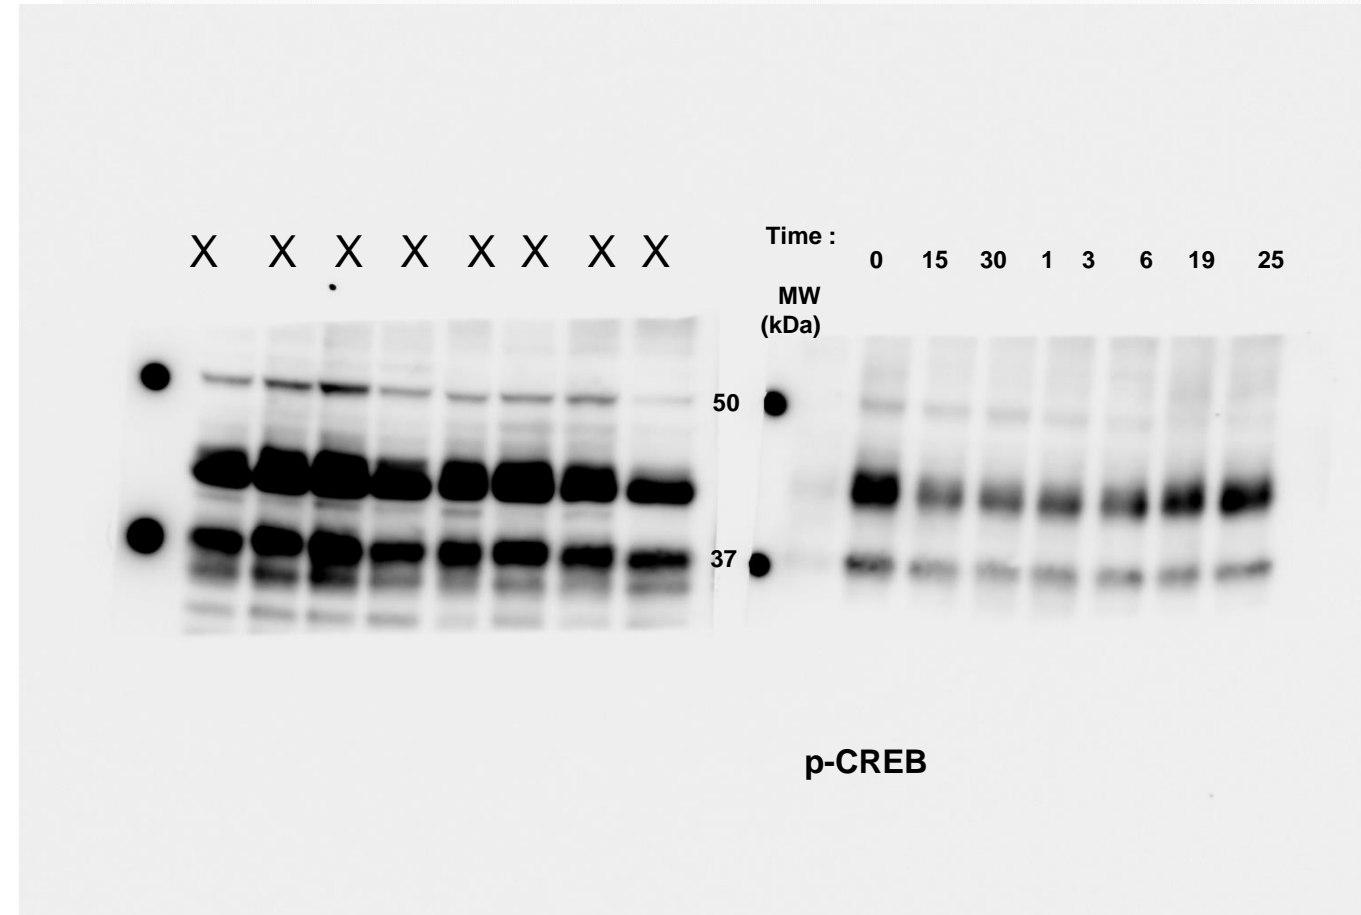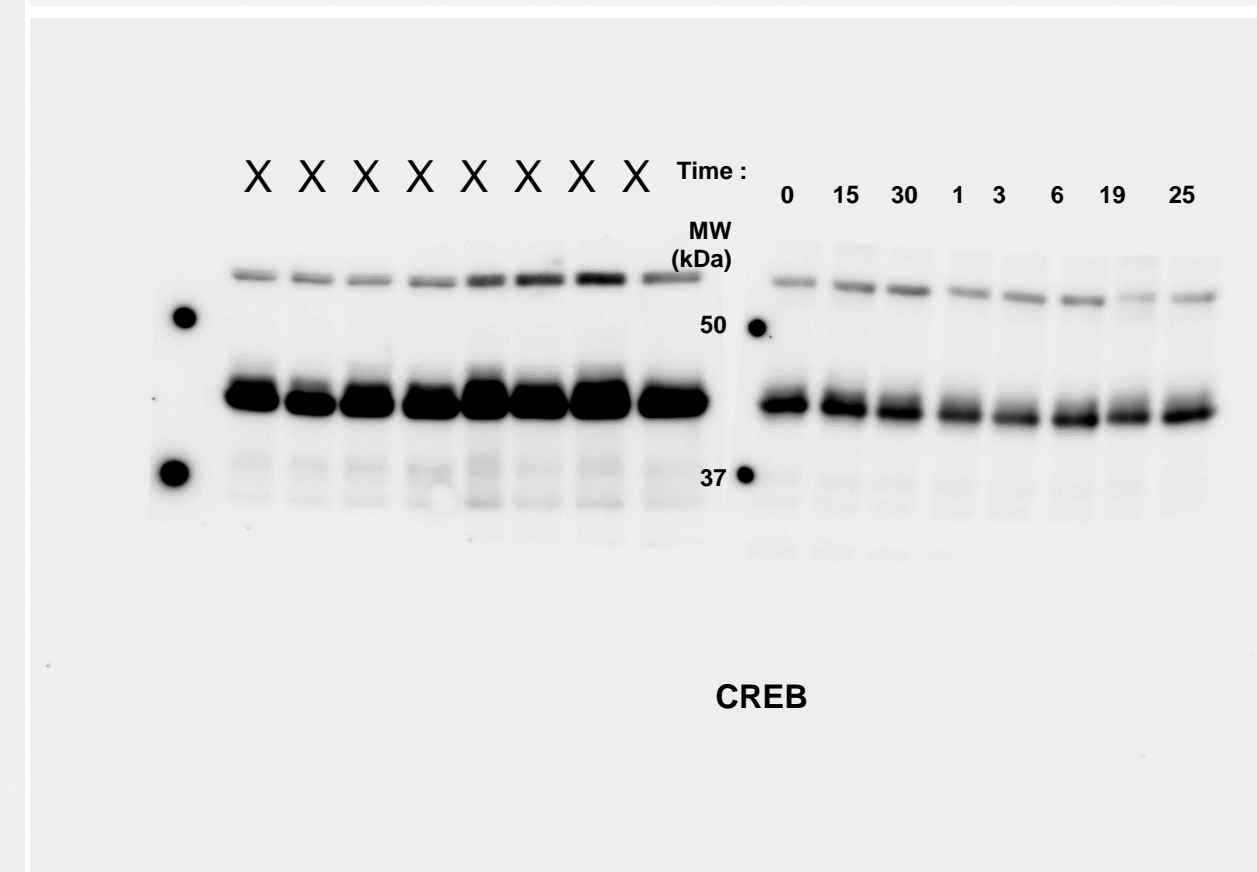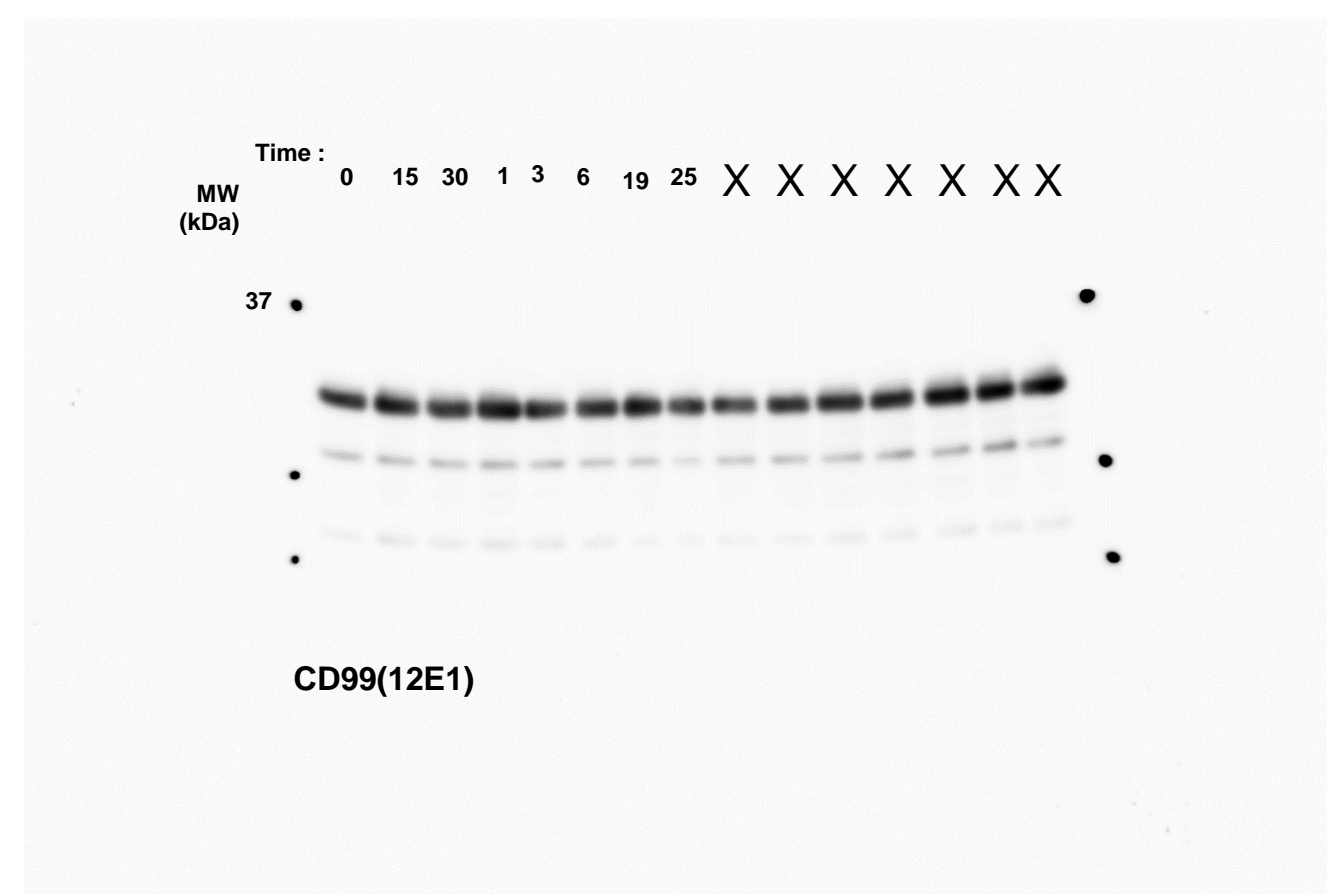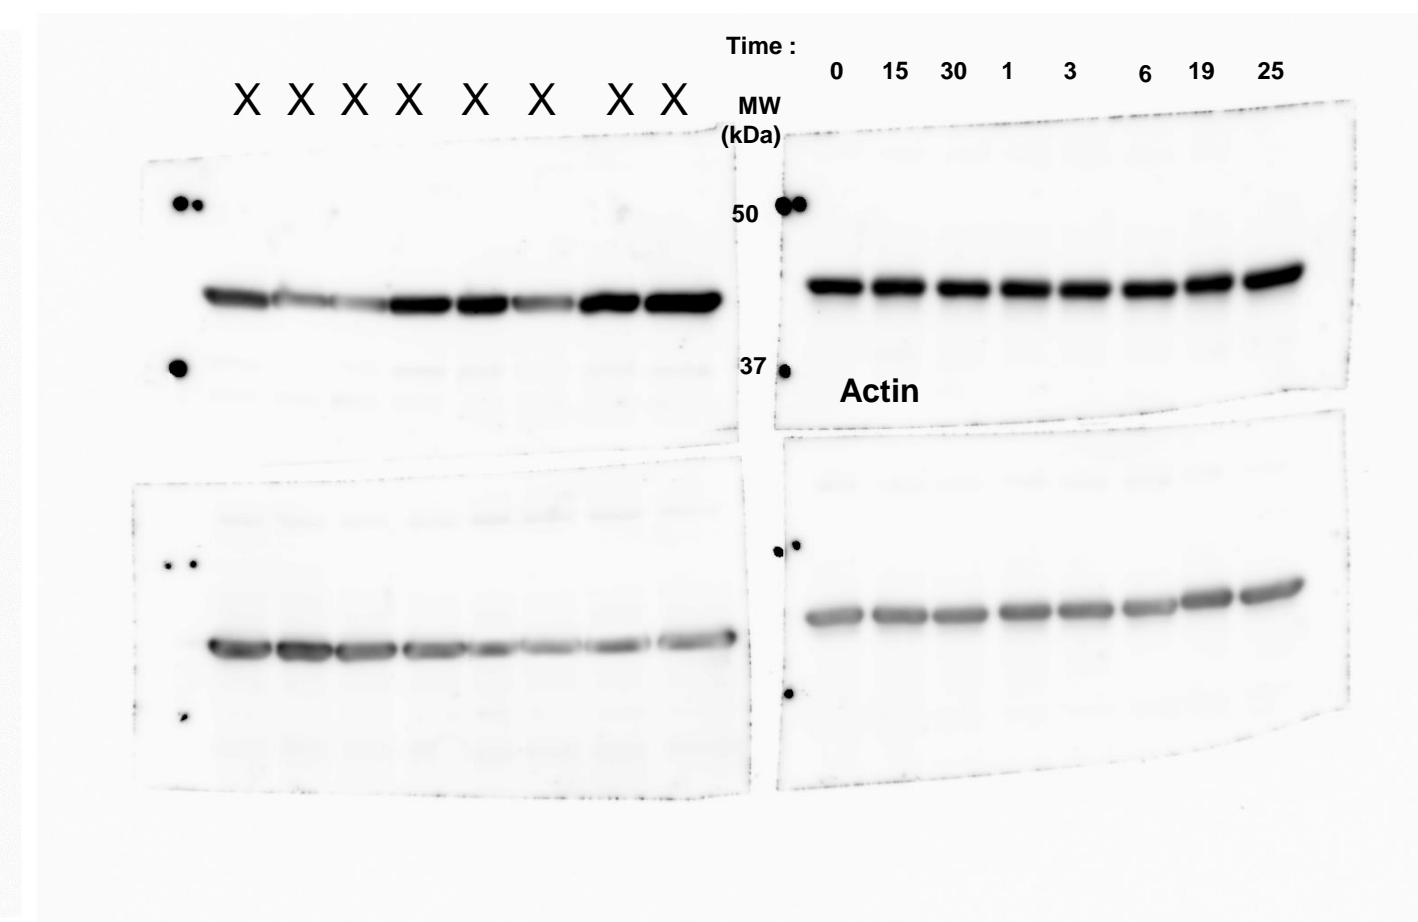

**Figure 5A; STA-ET-7.2**

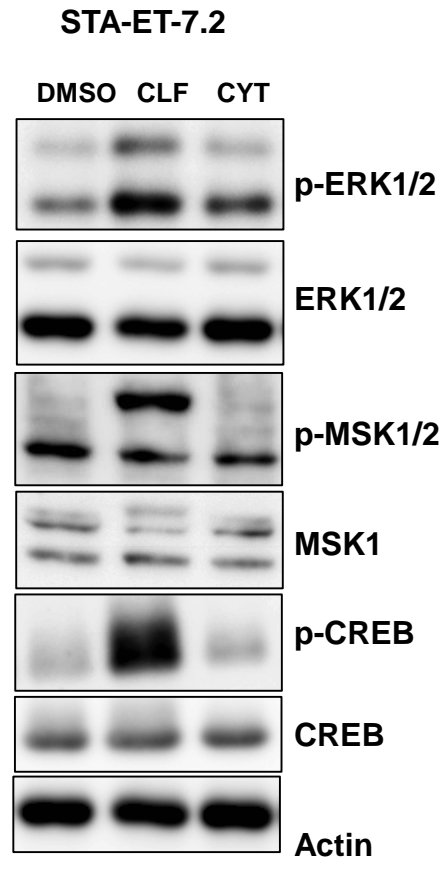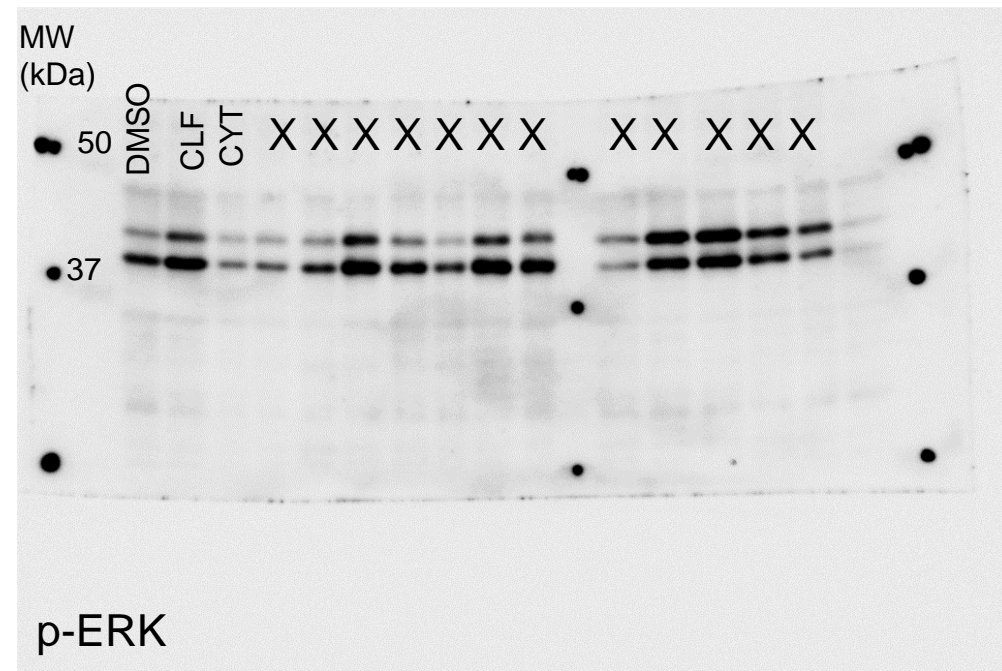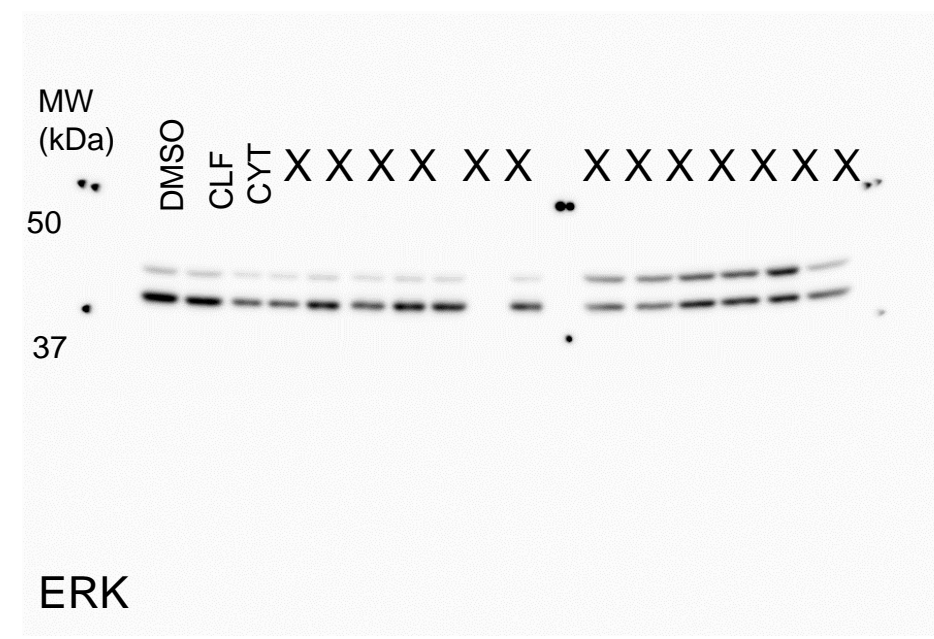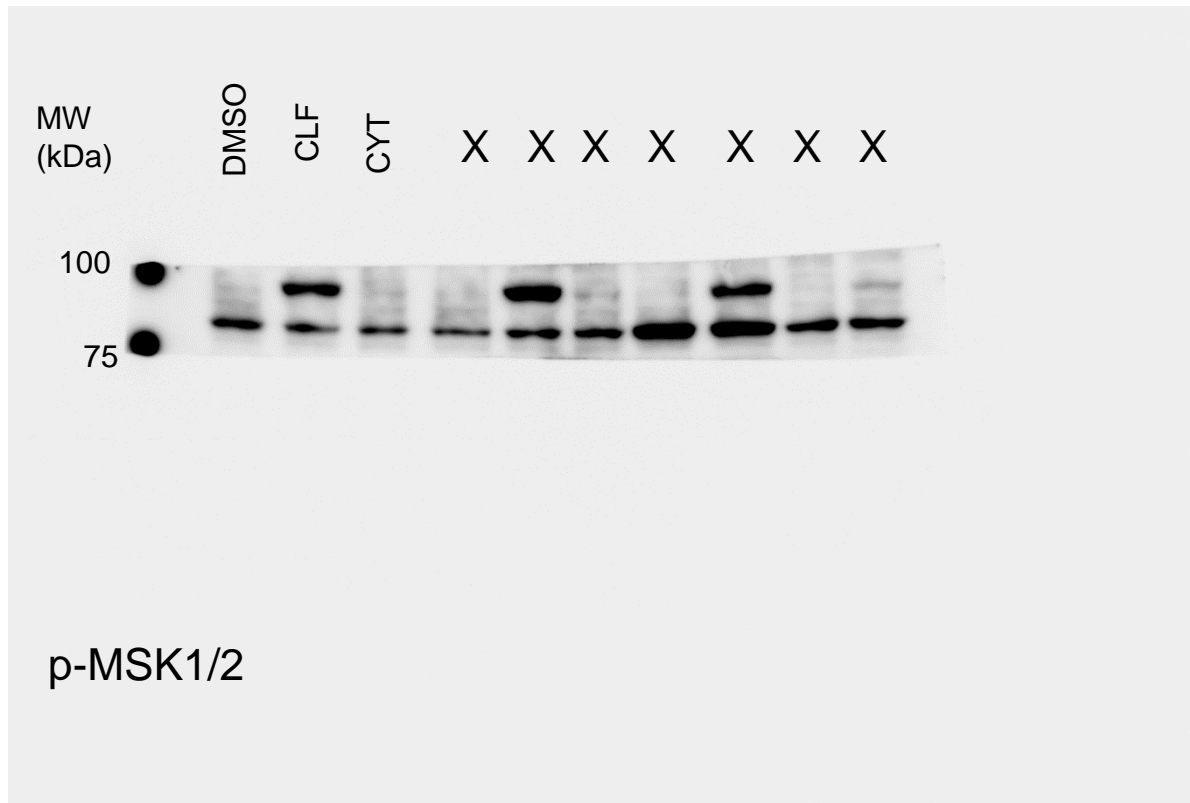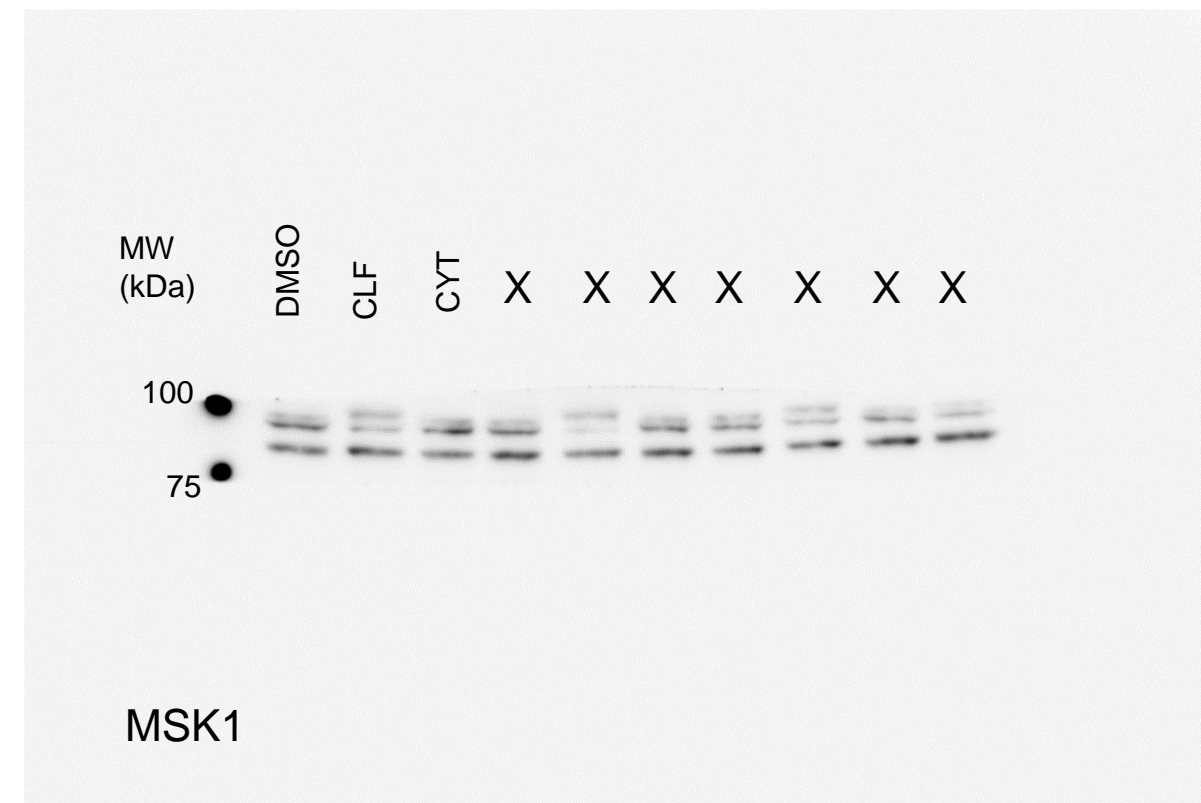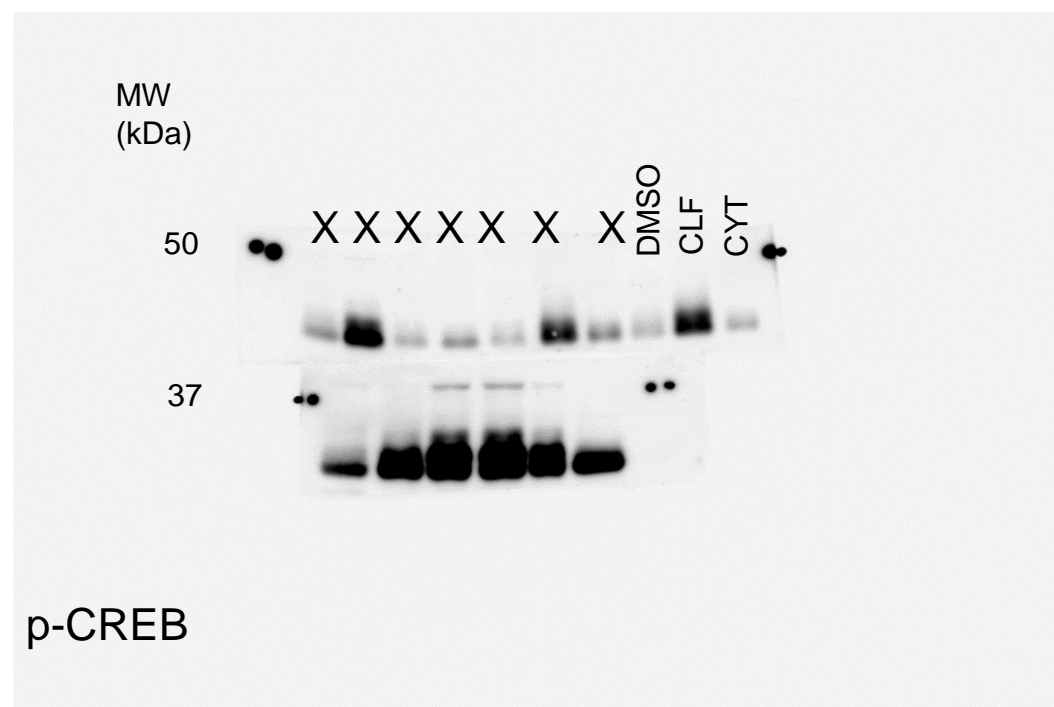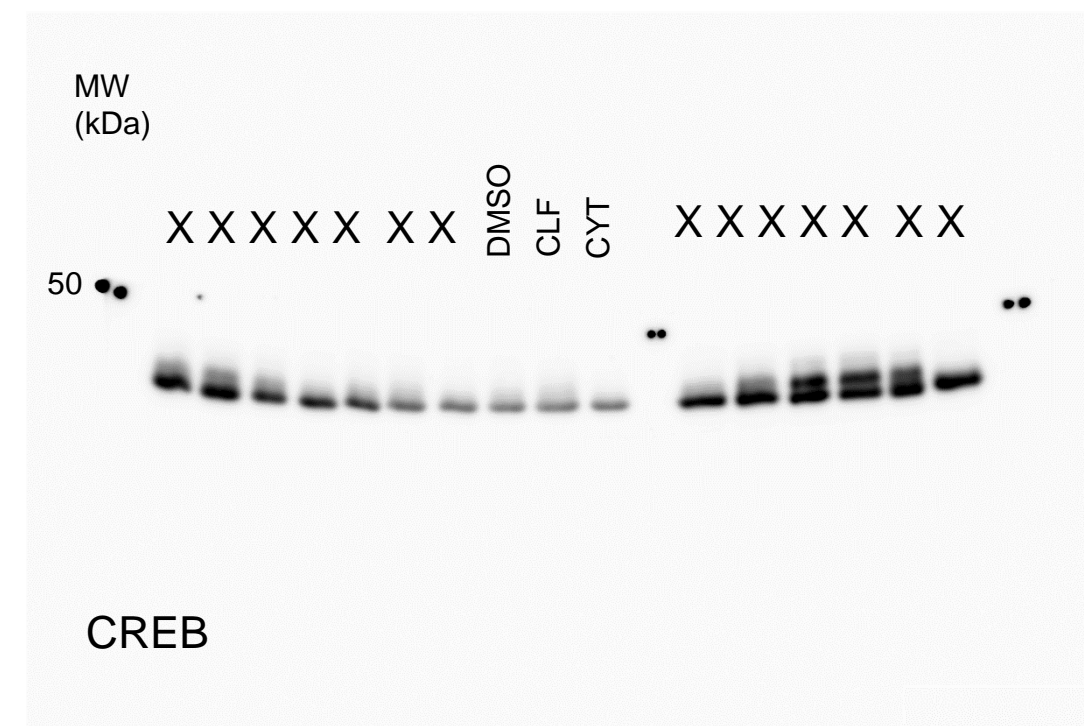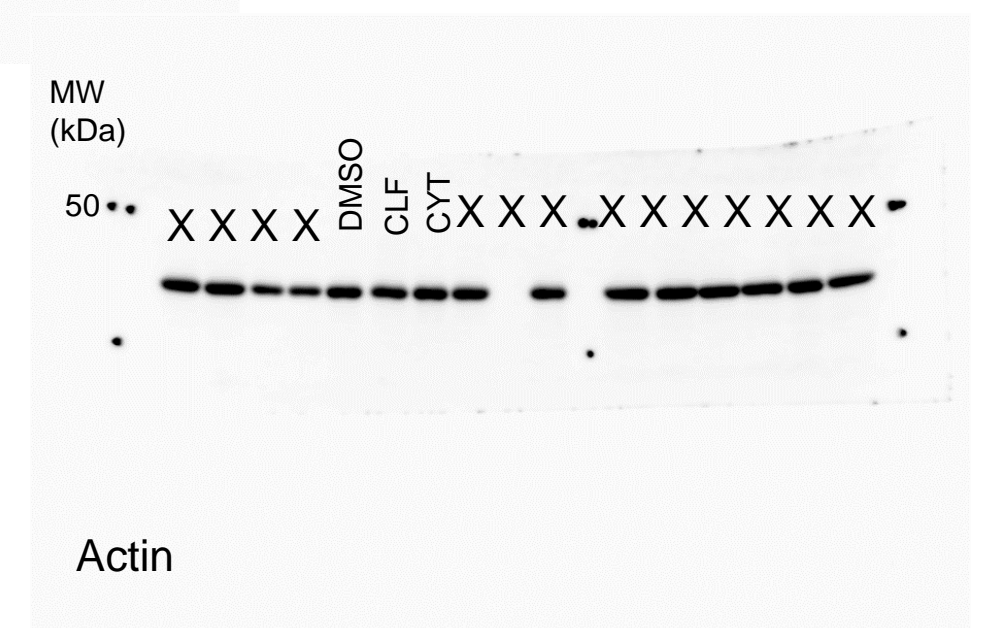

**Figure 5B**  
**RD-ES and A4573**

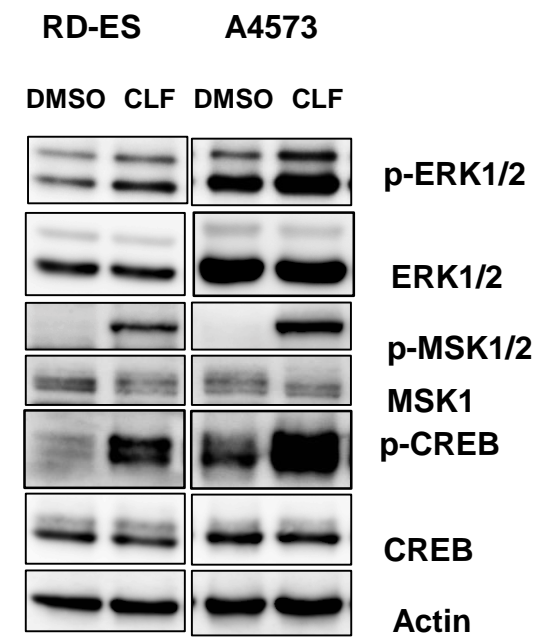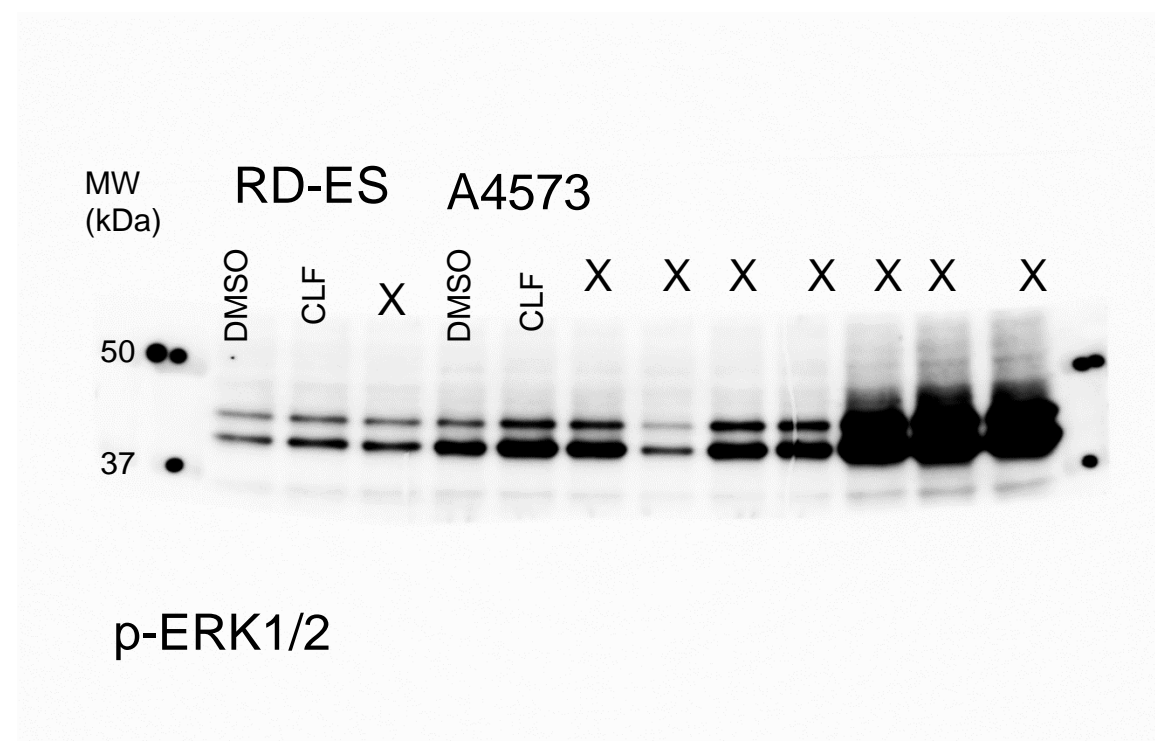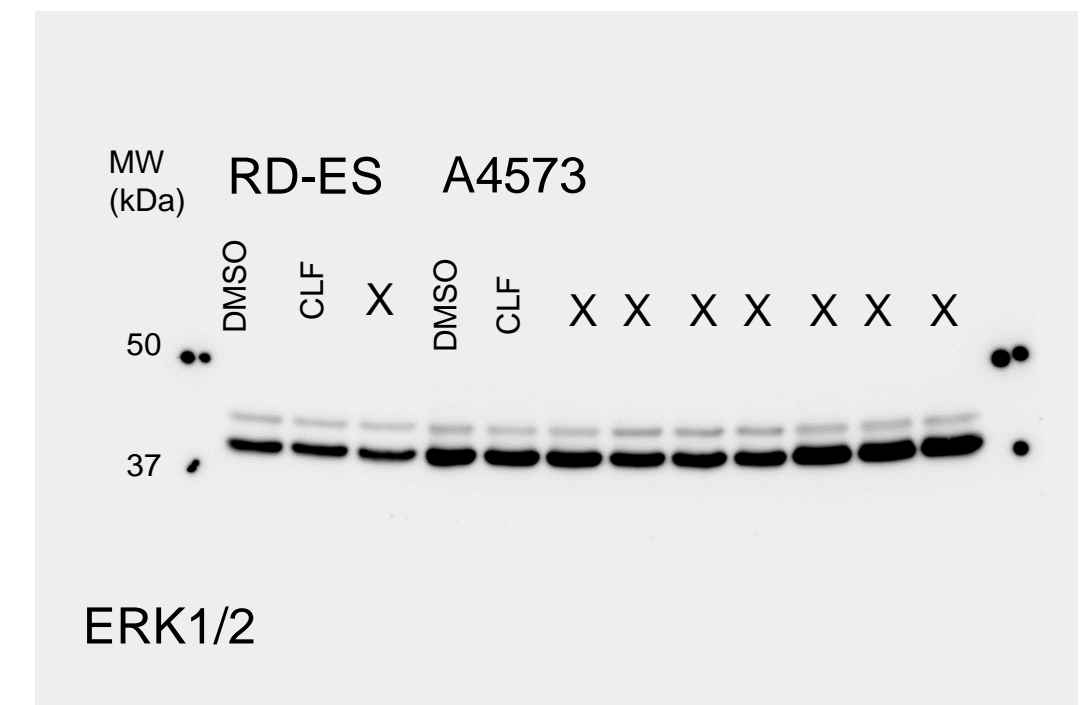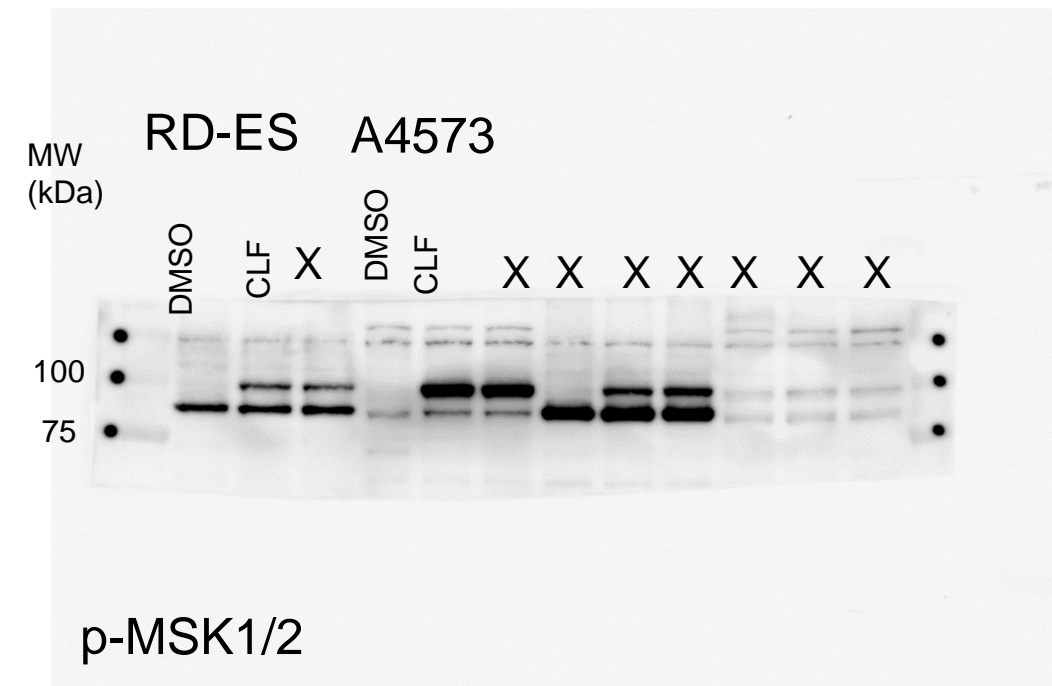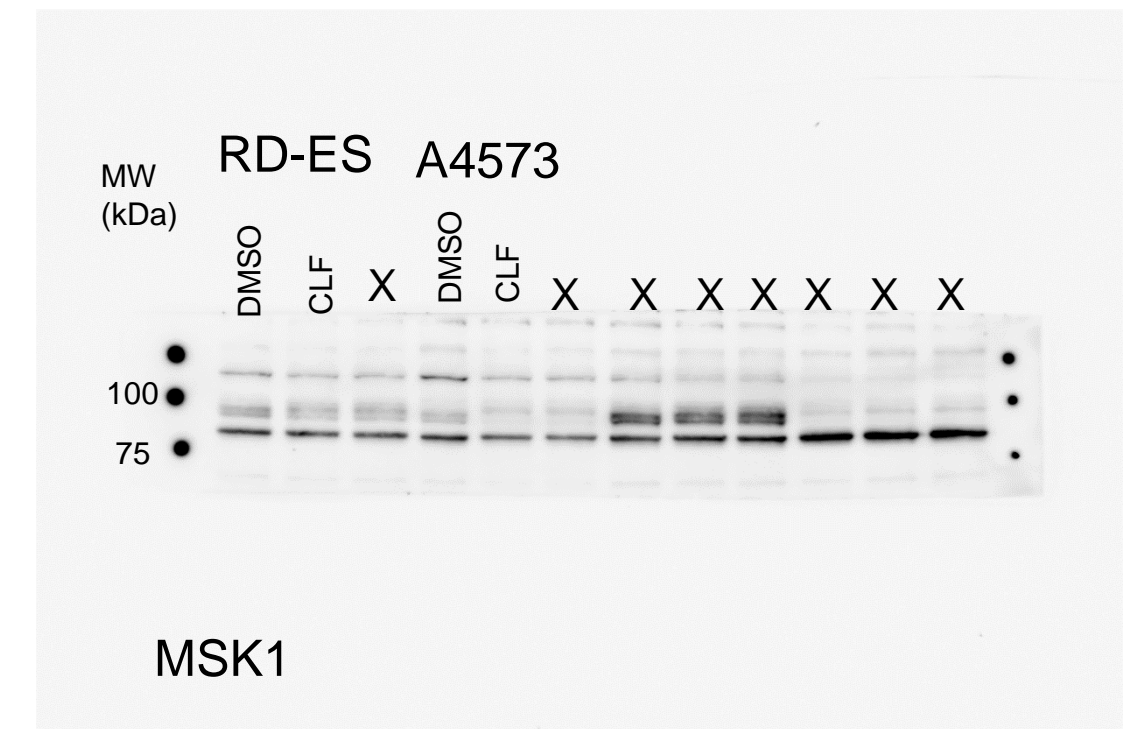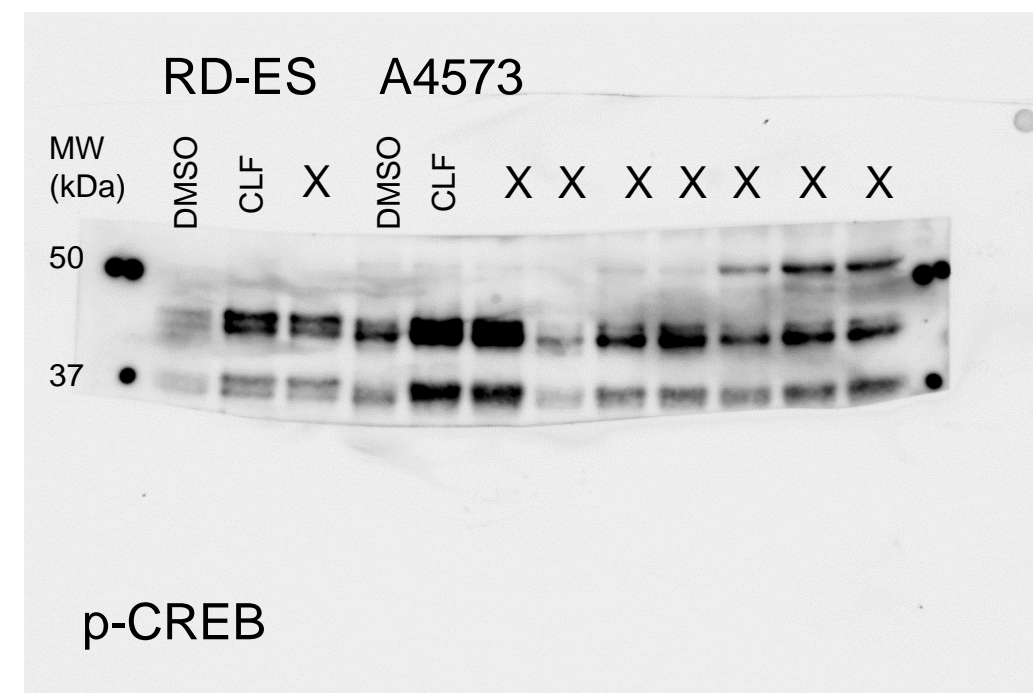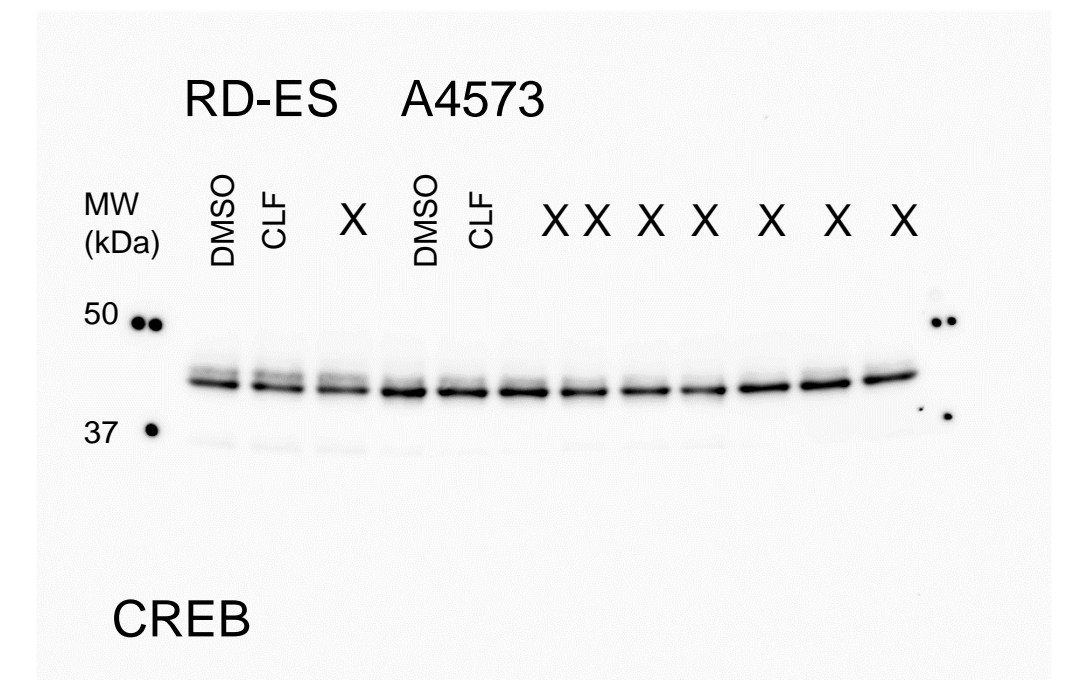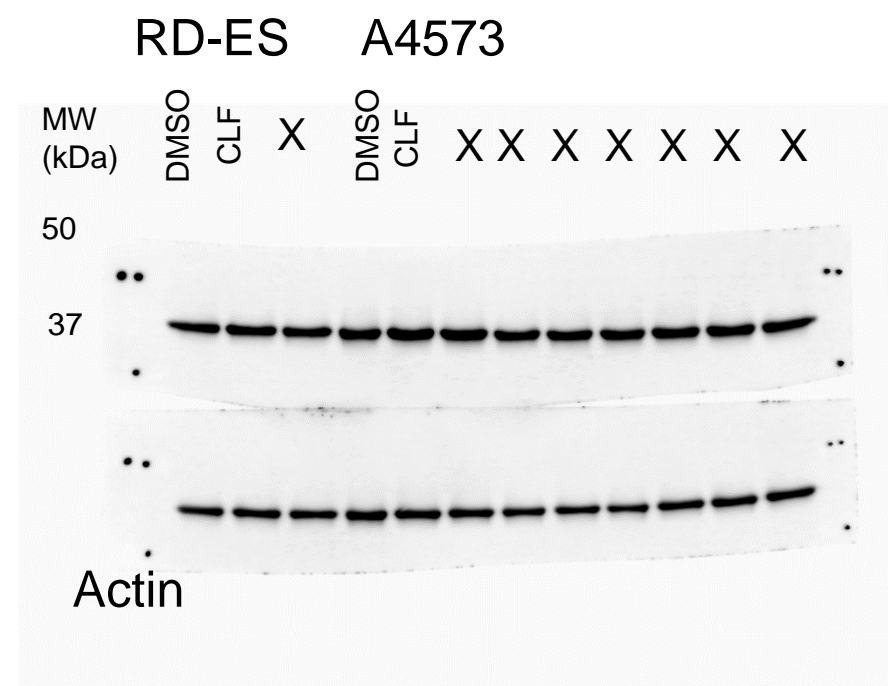

**Figure 5B**  
**STA-ET-7.2**

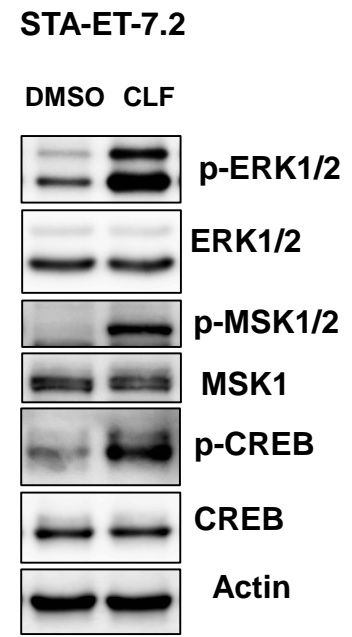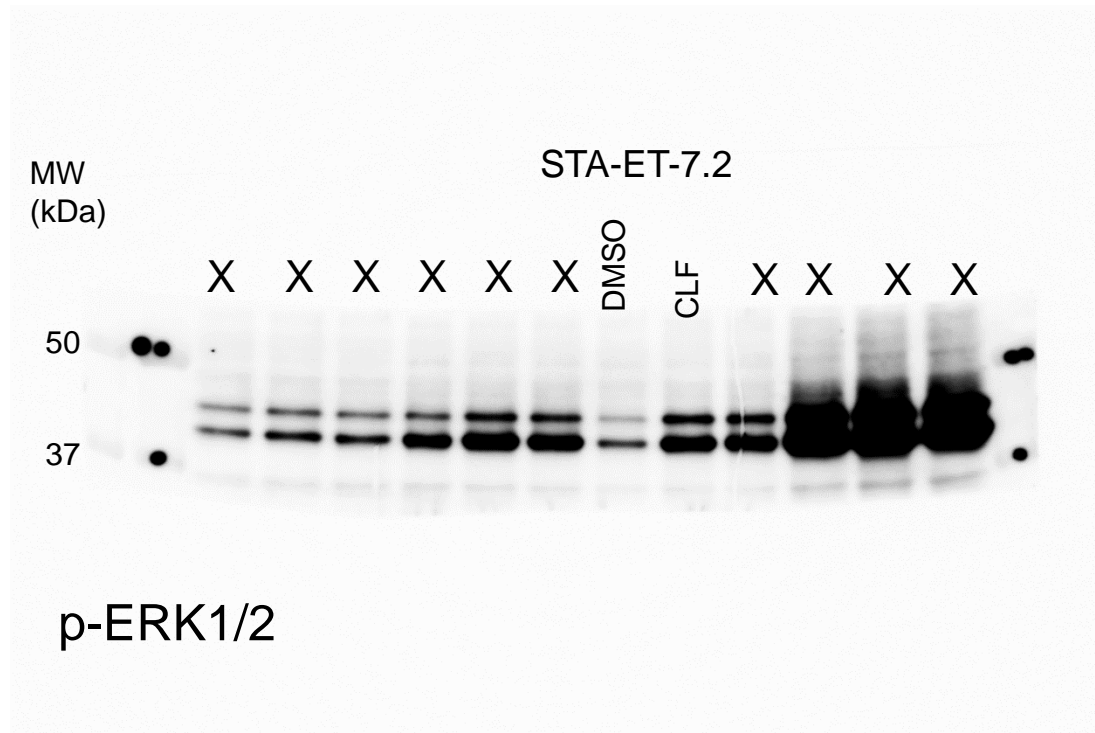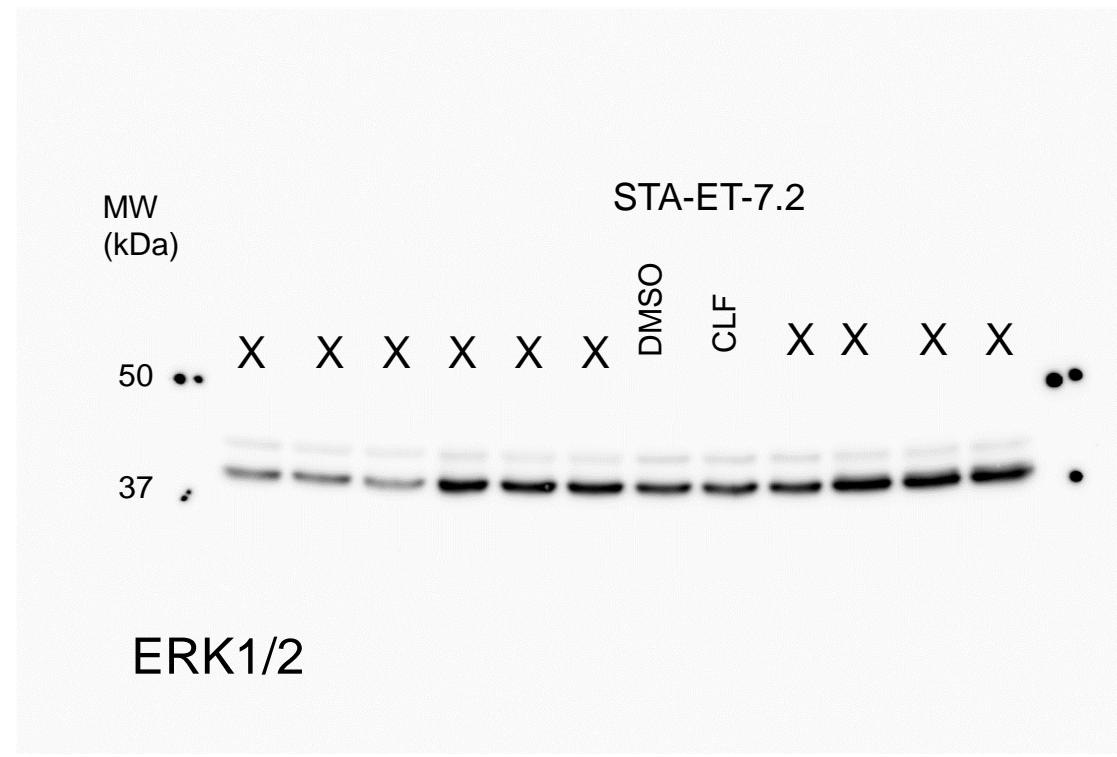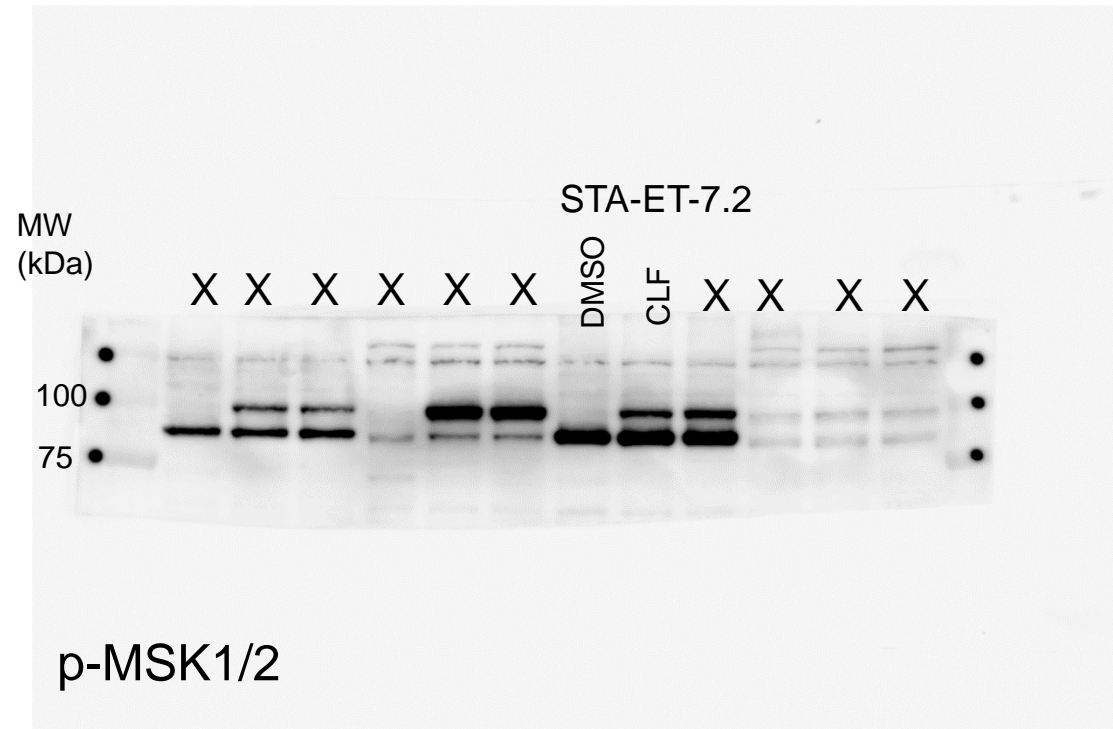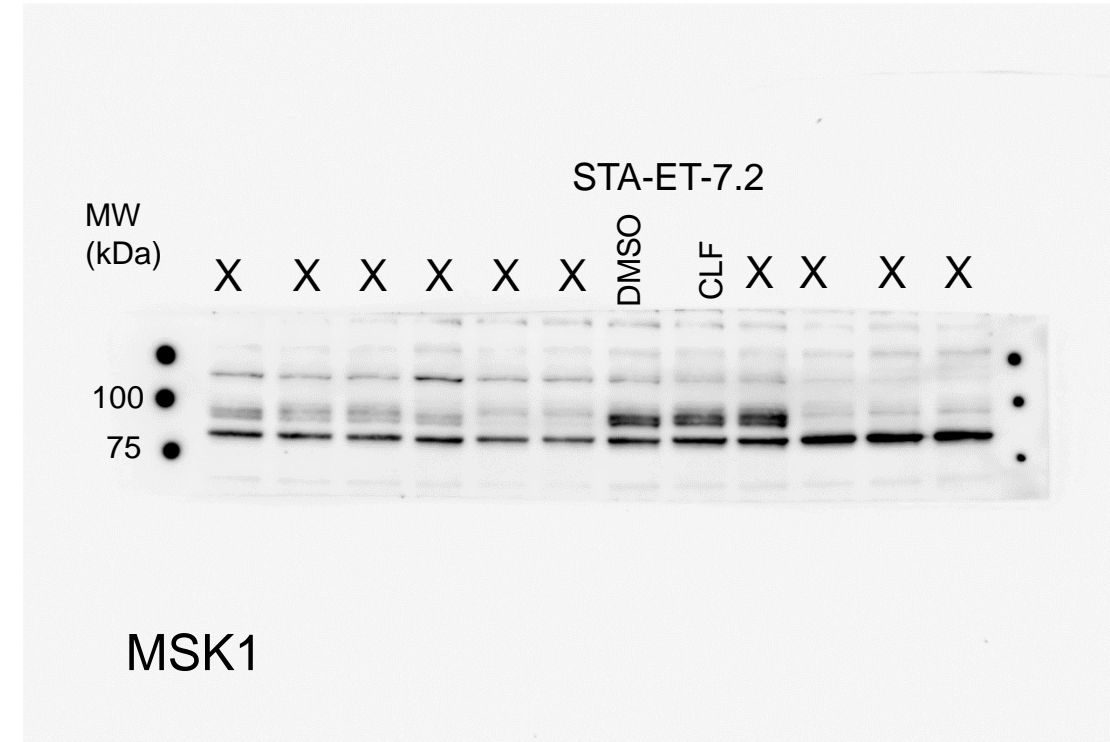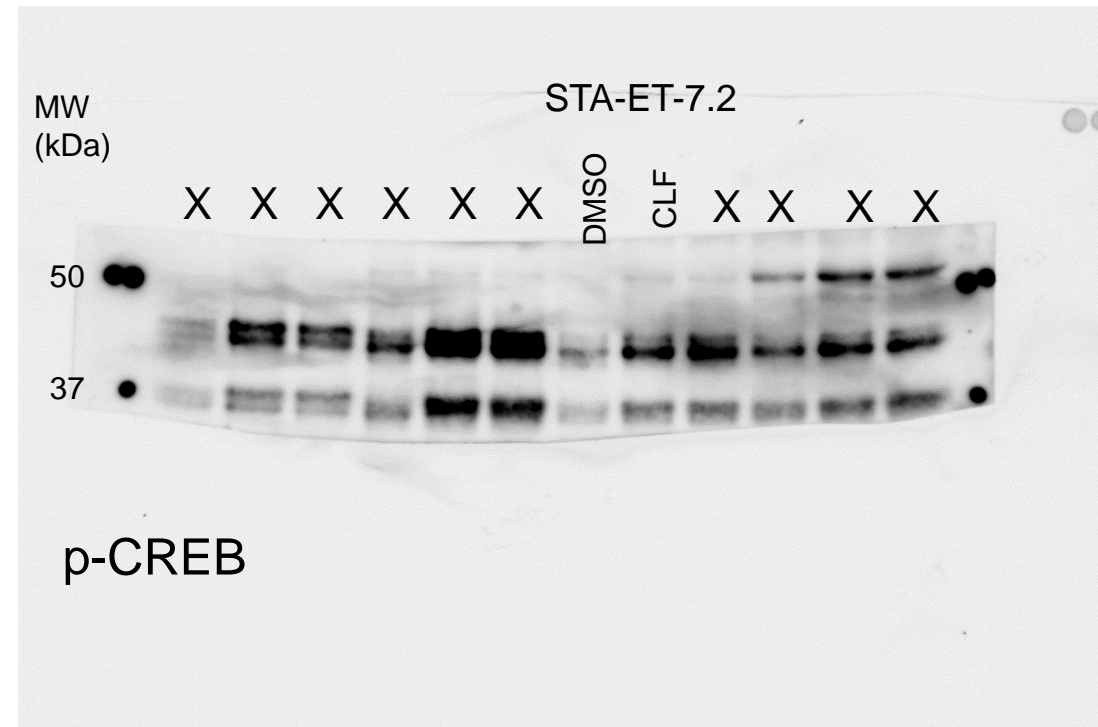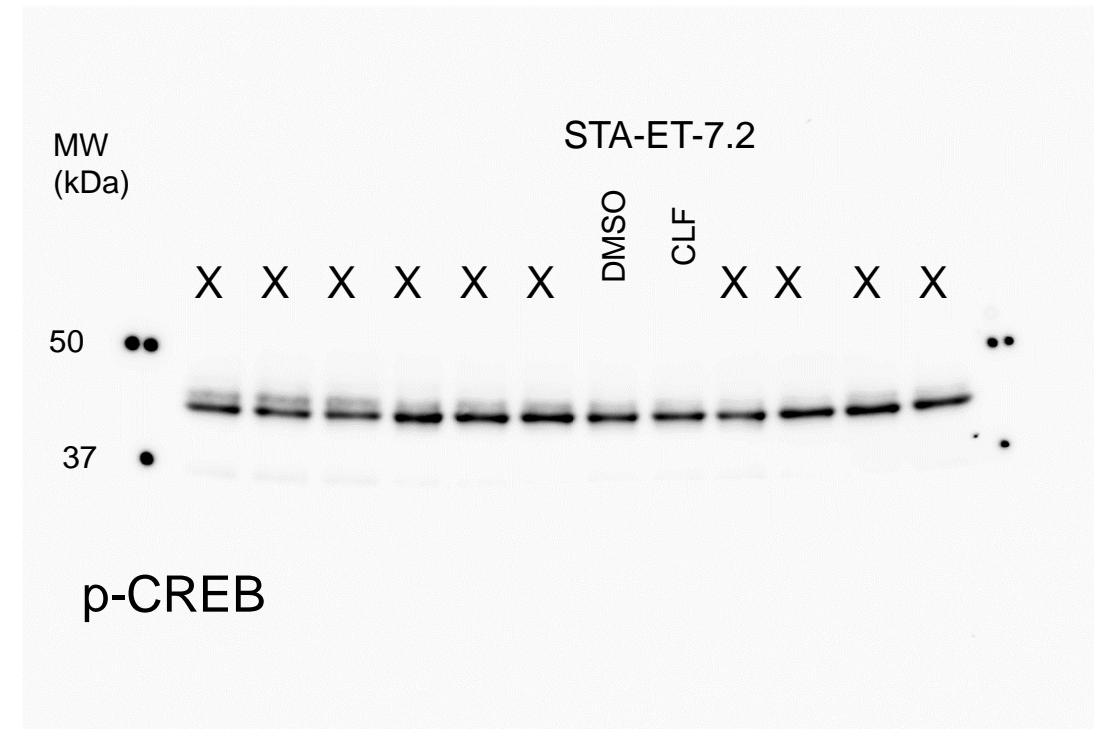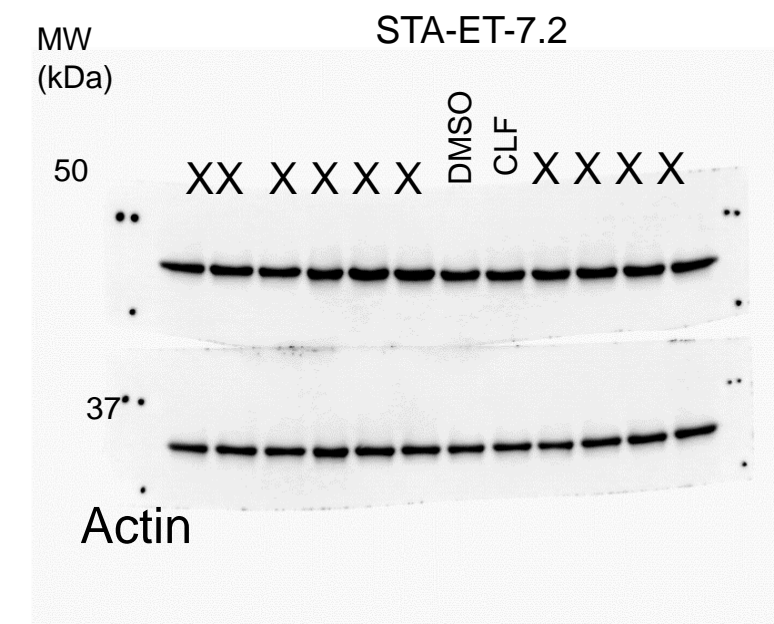

# Figure 5B

## TC32

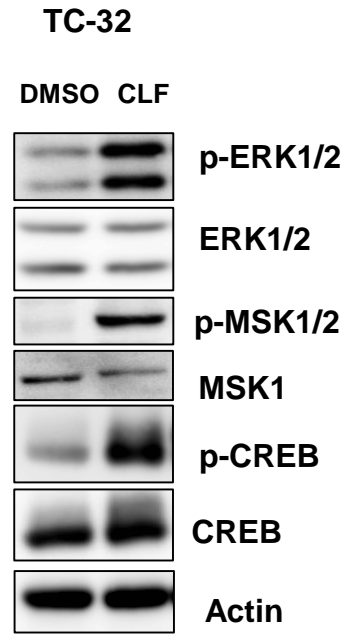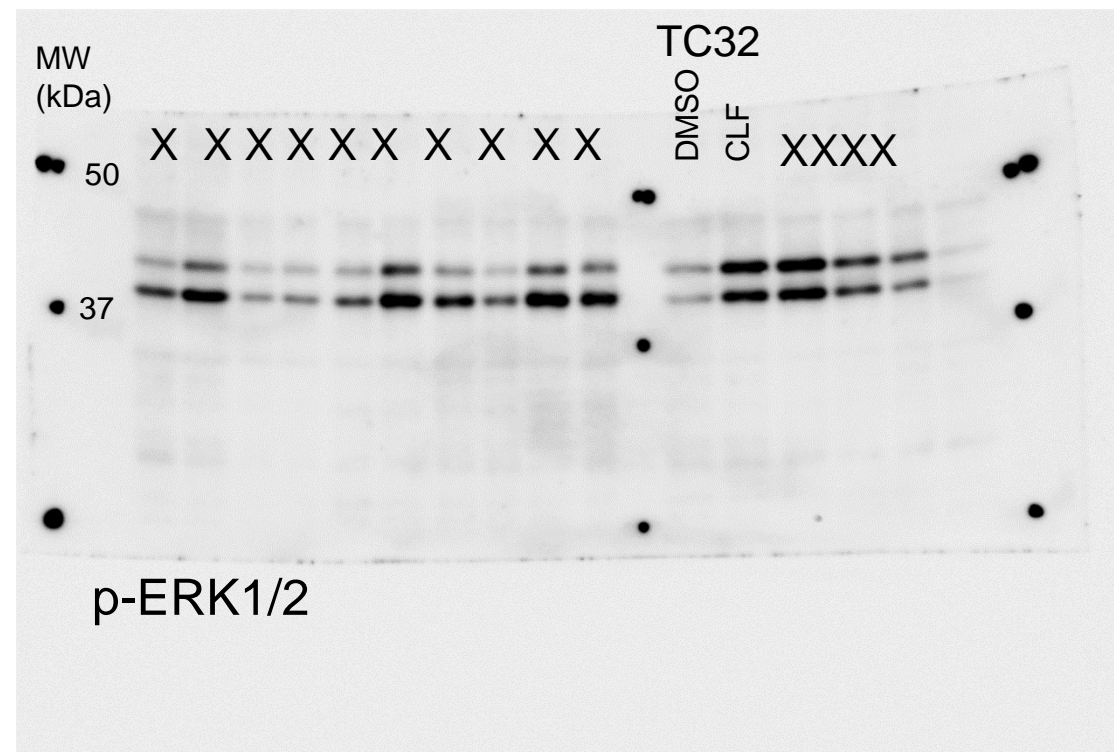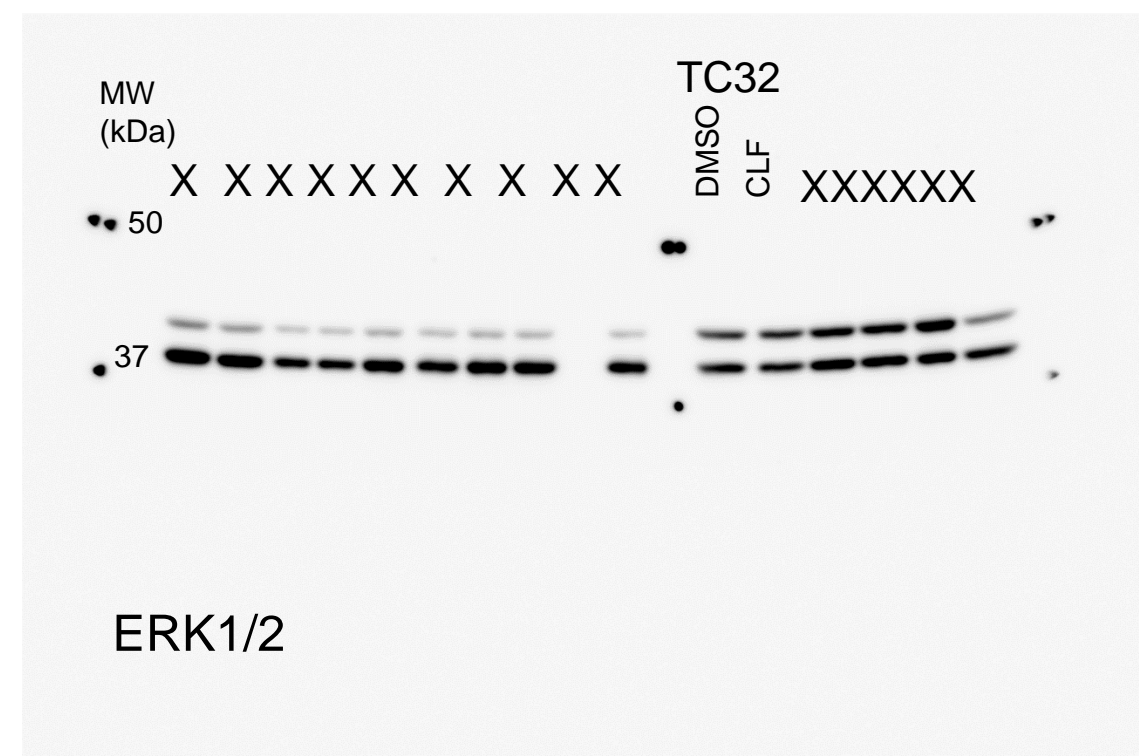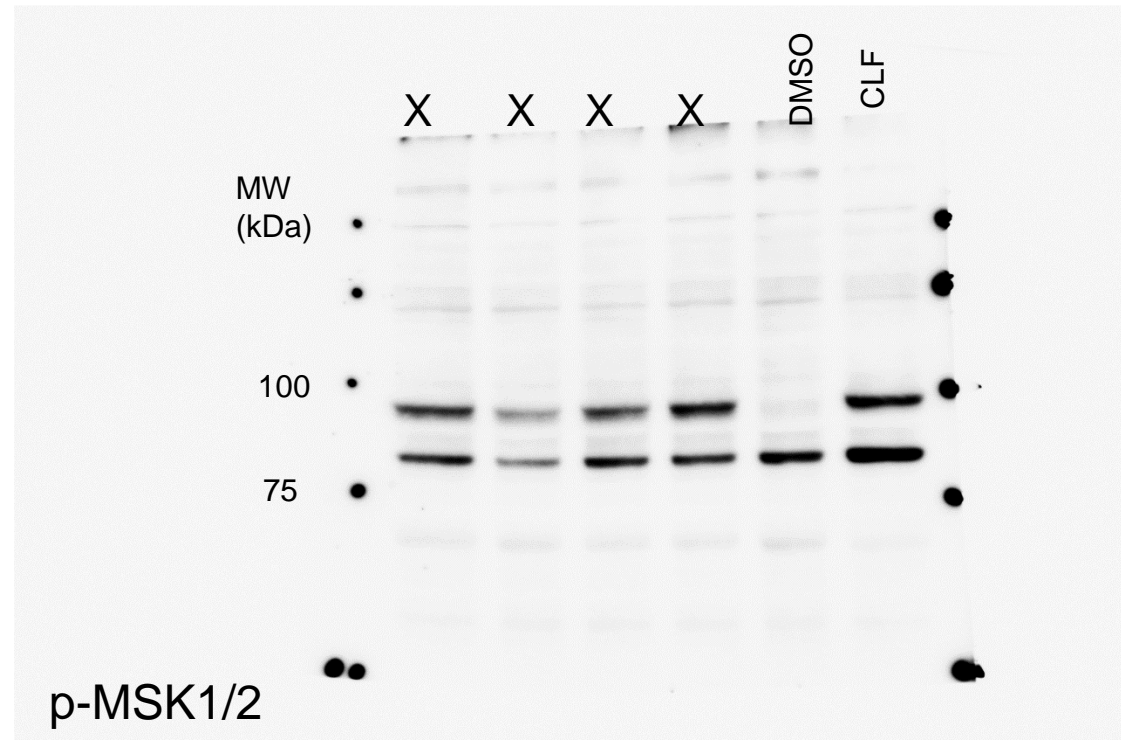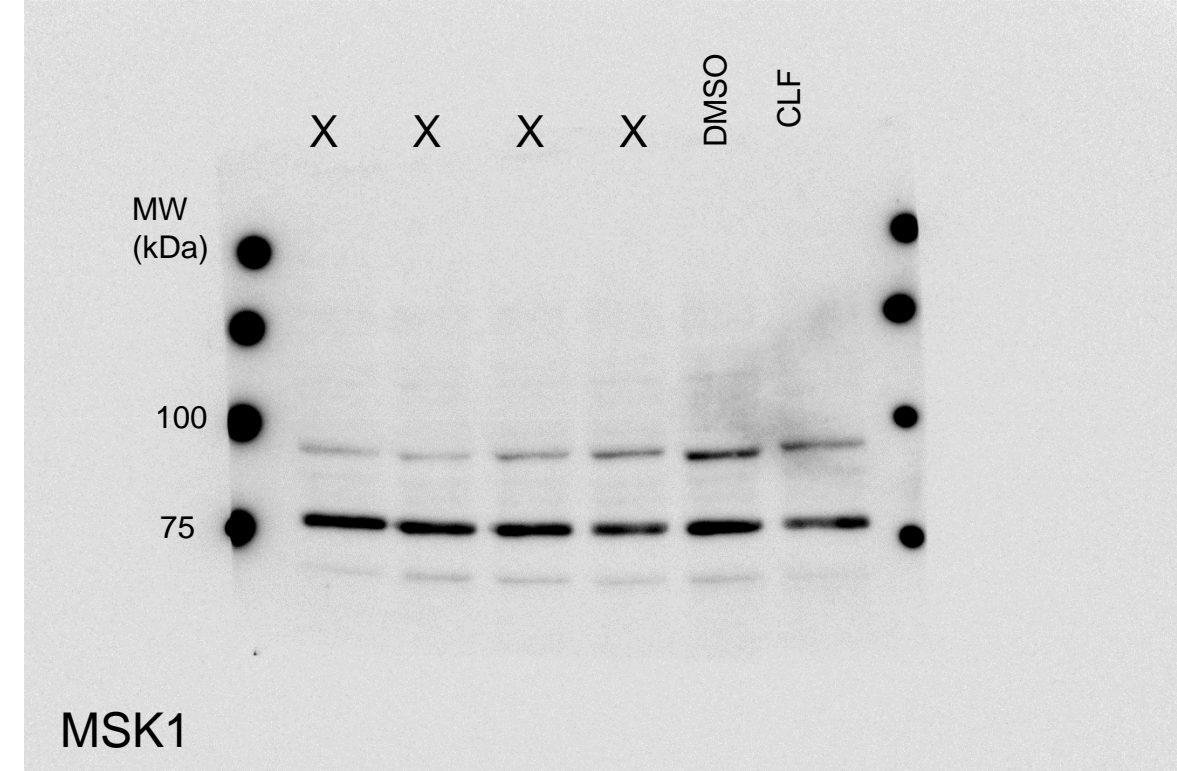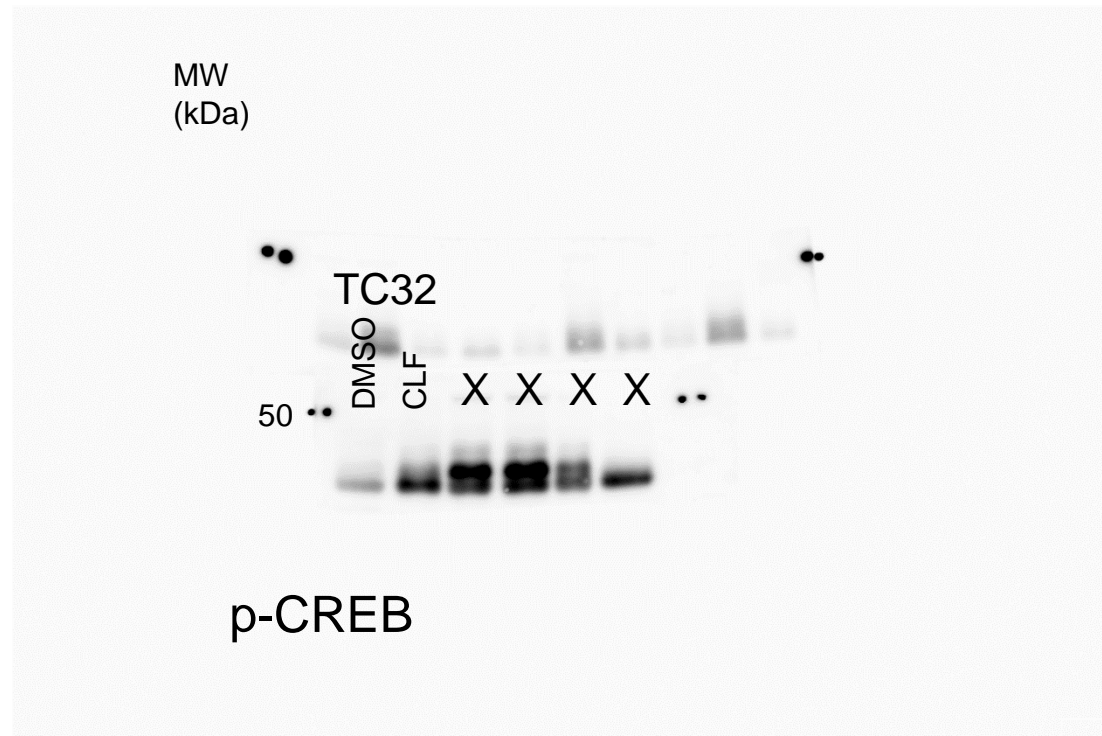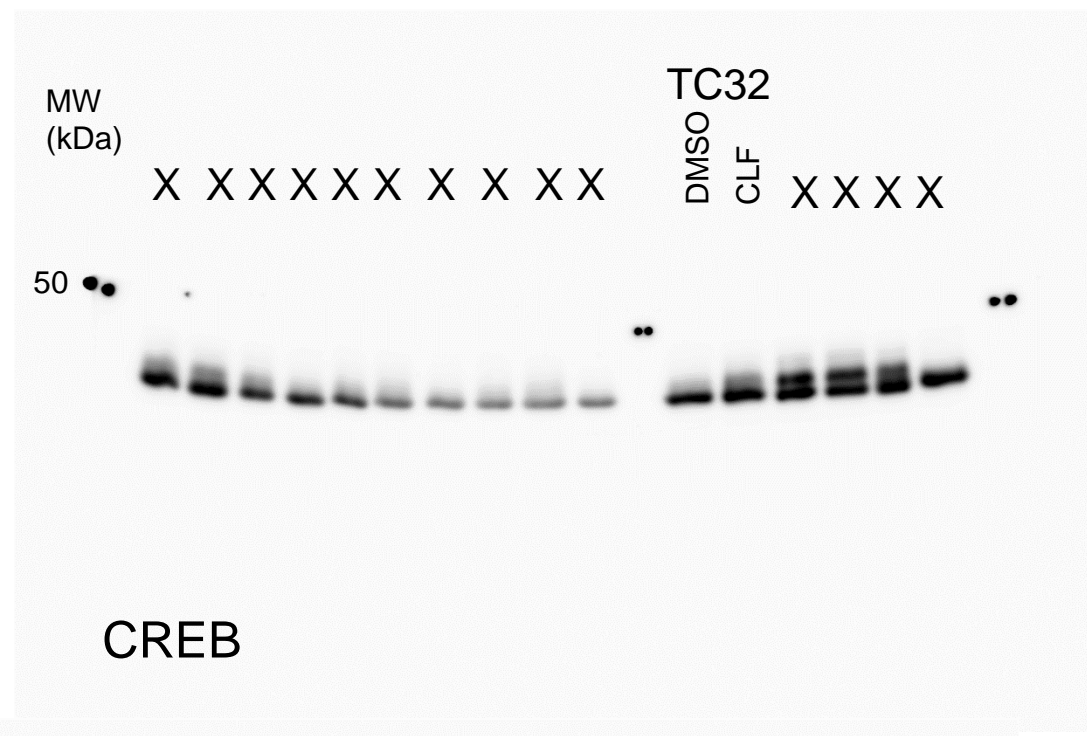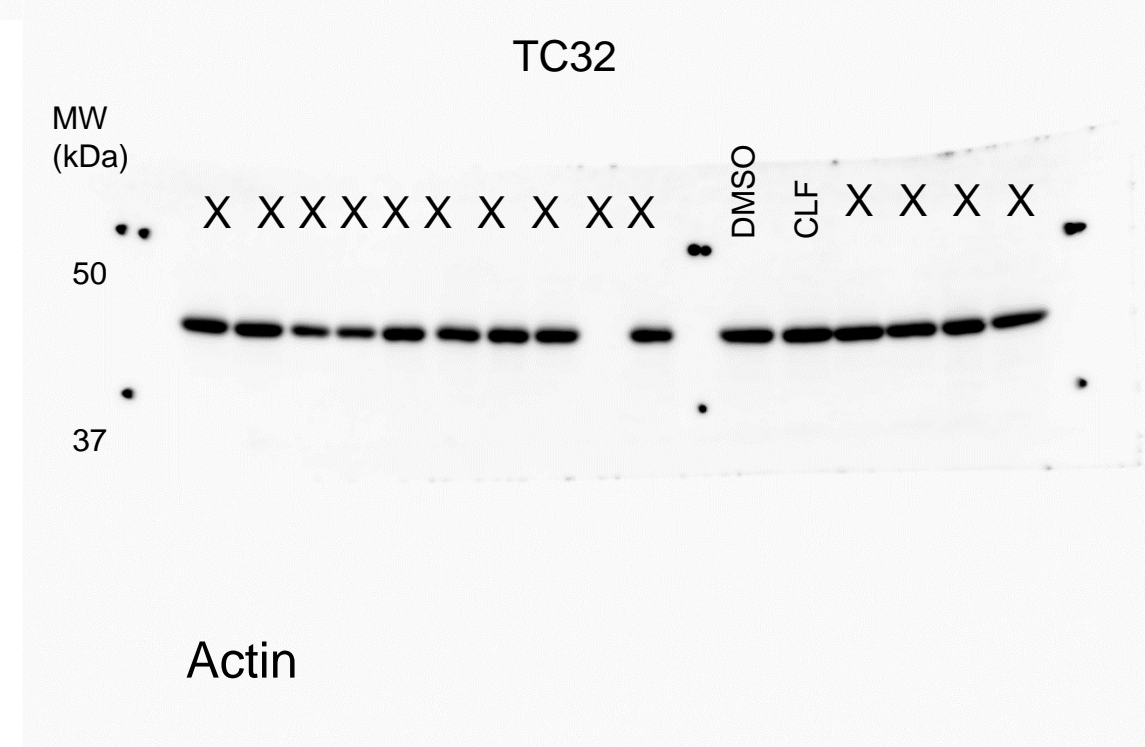

**Figure 5B**  
**TC71**

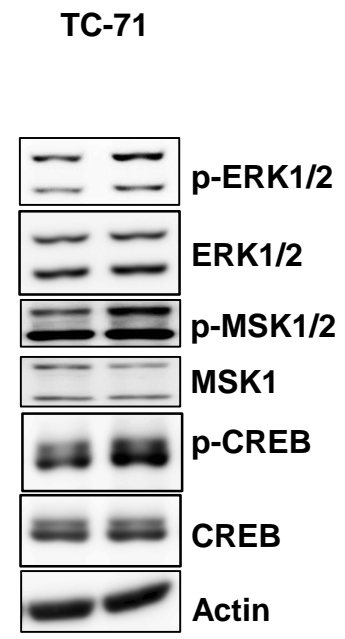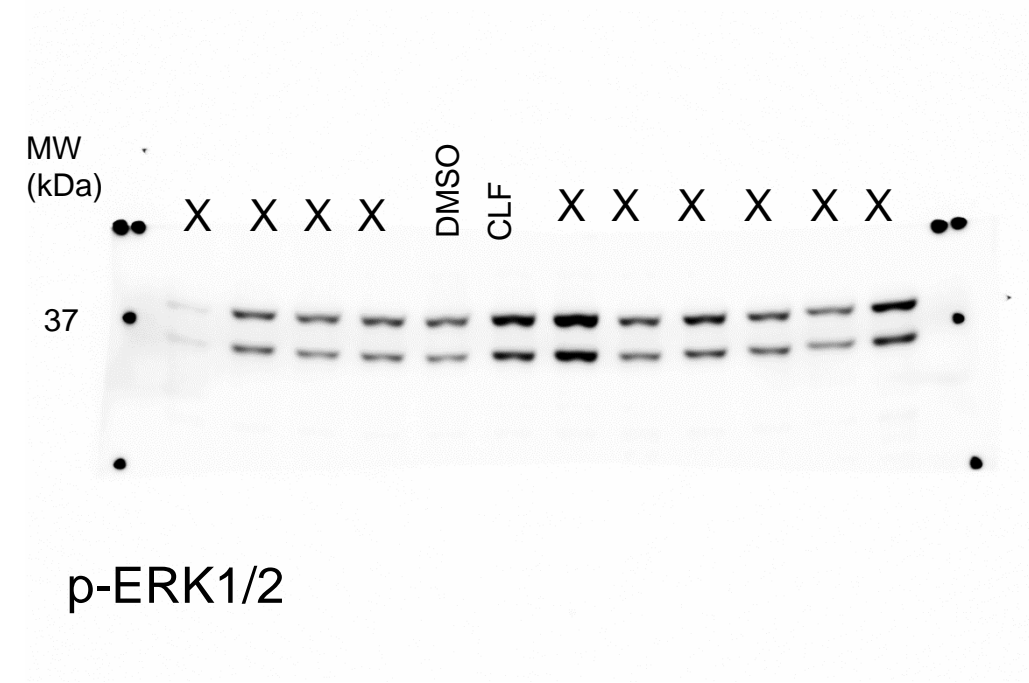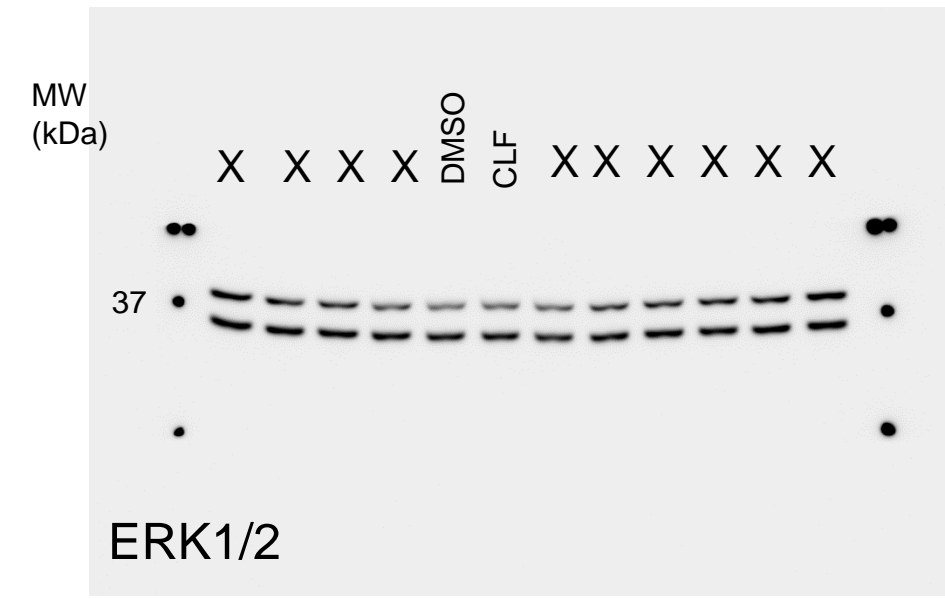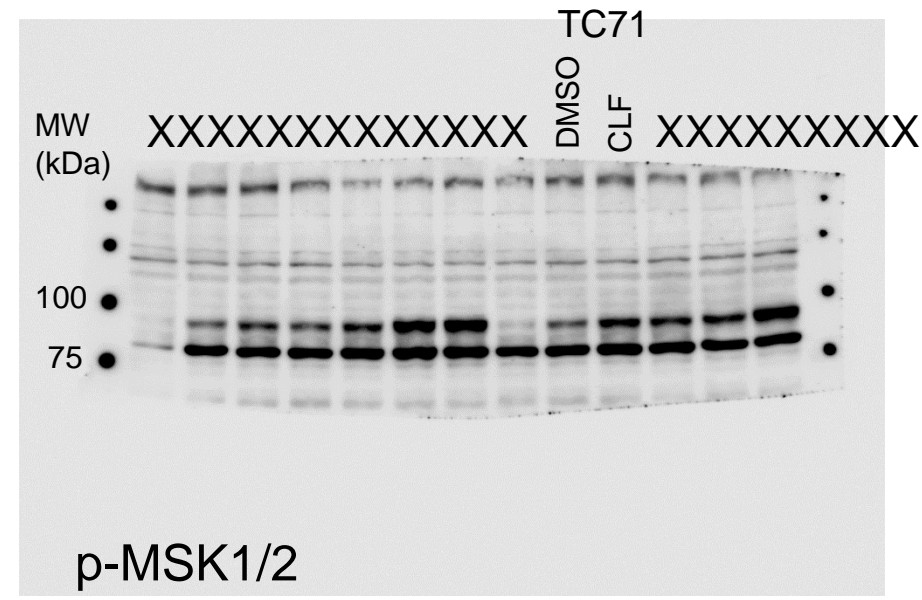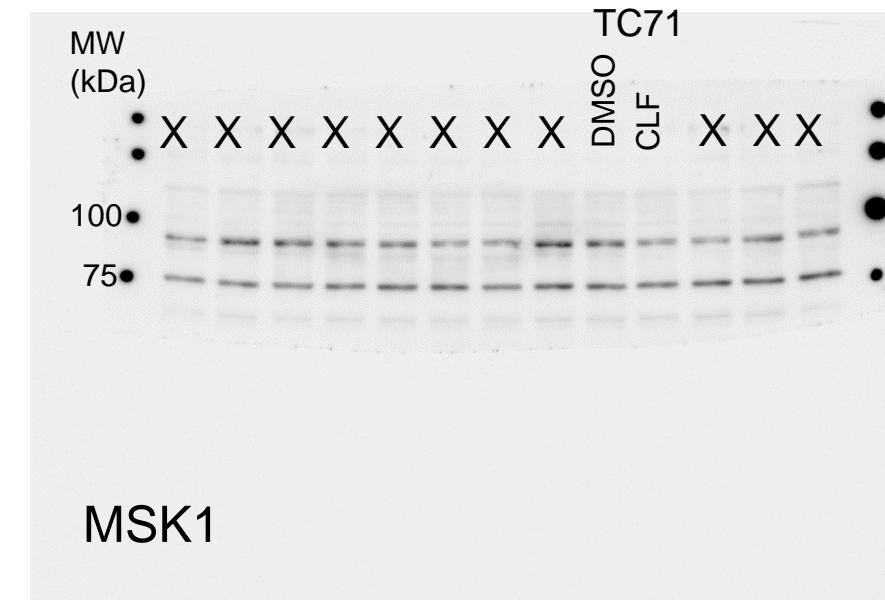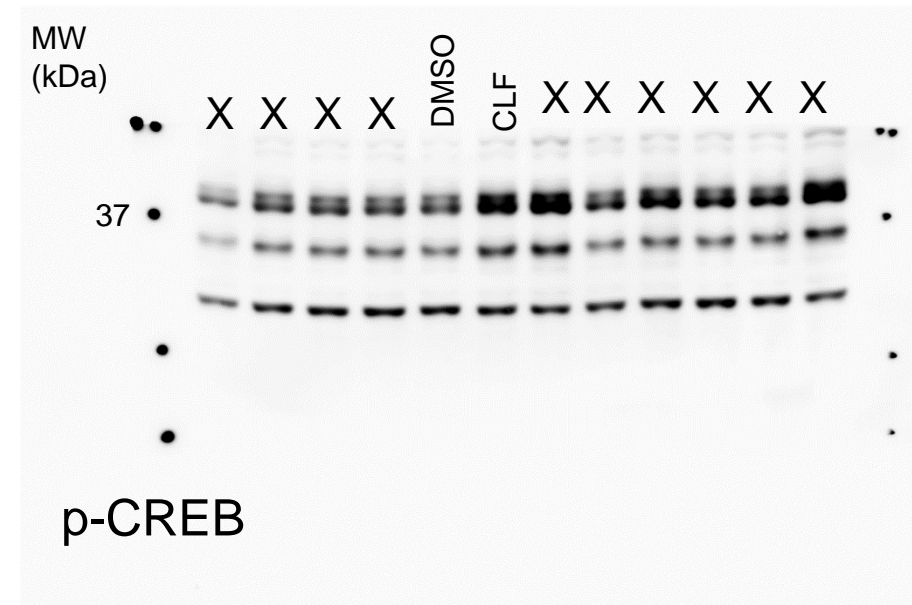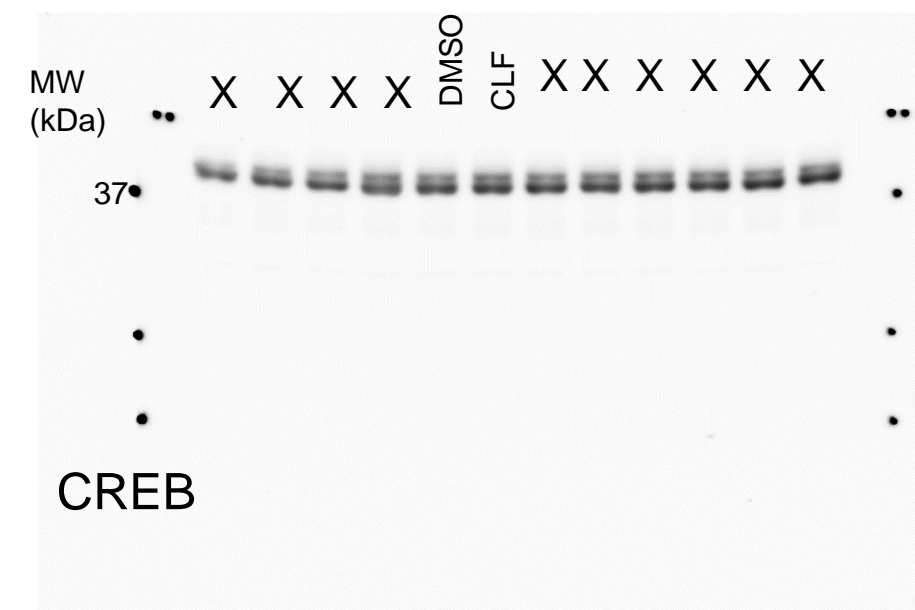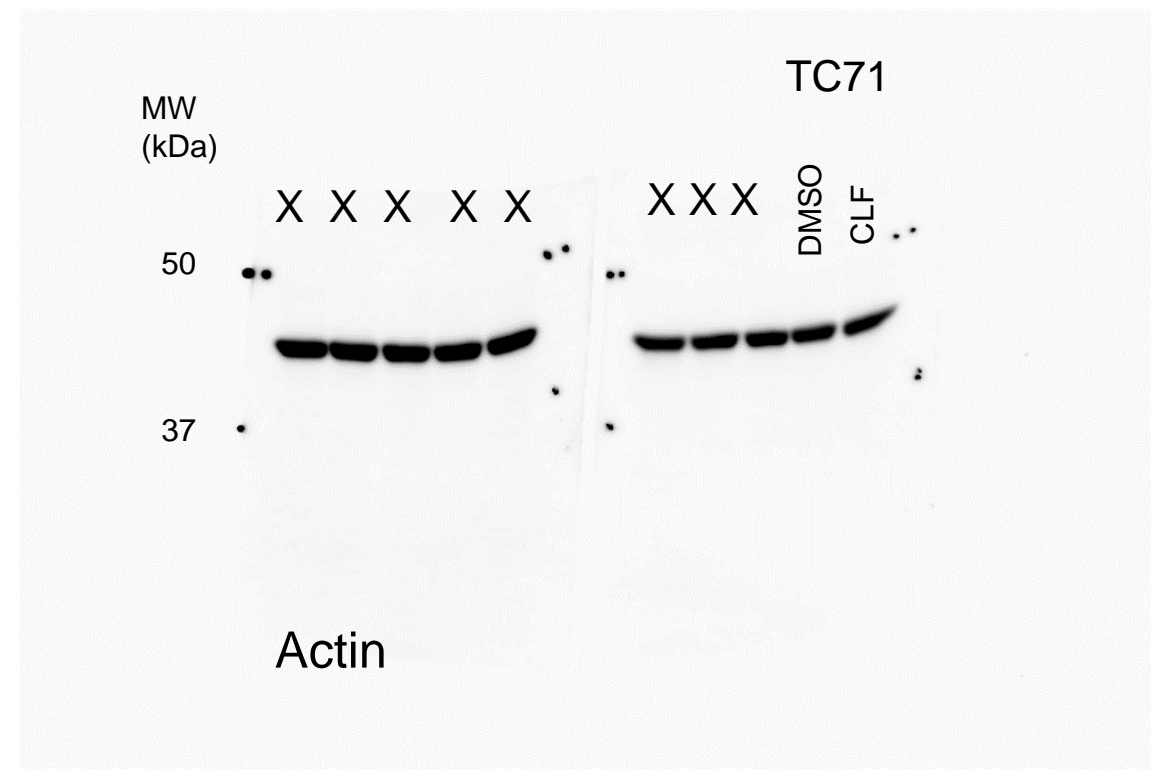

**Figure 5C**

**C**

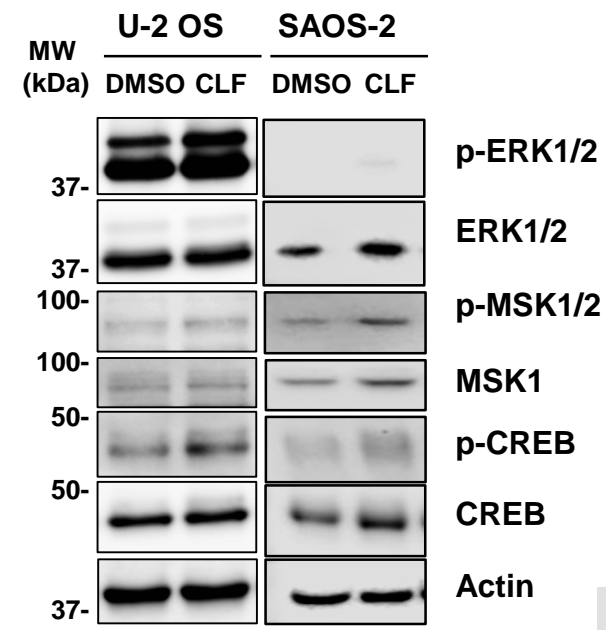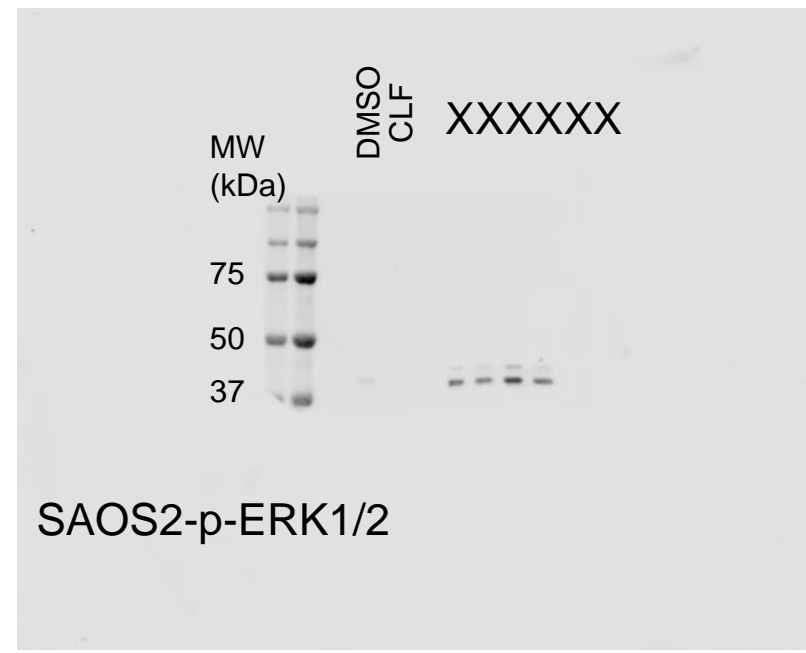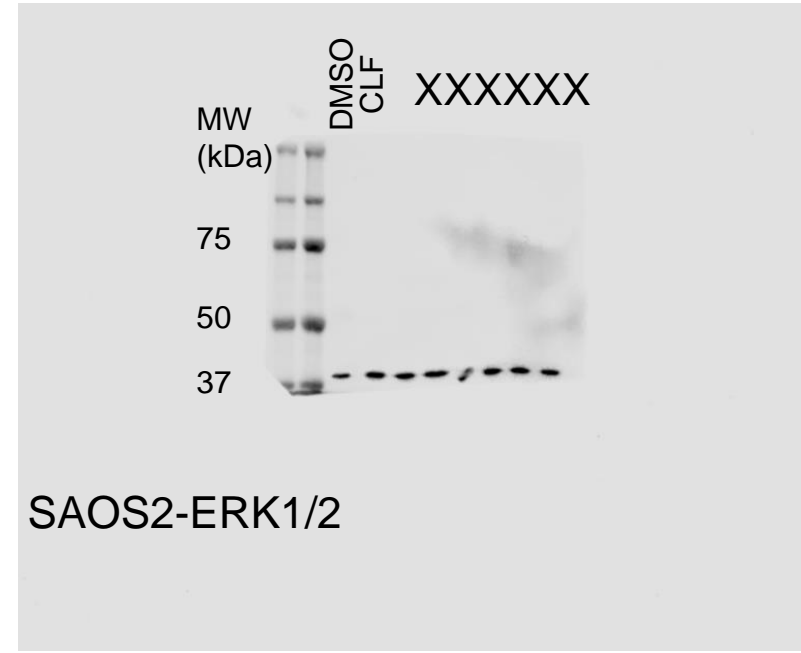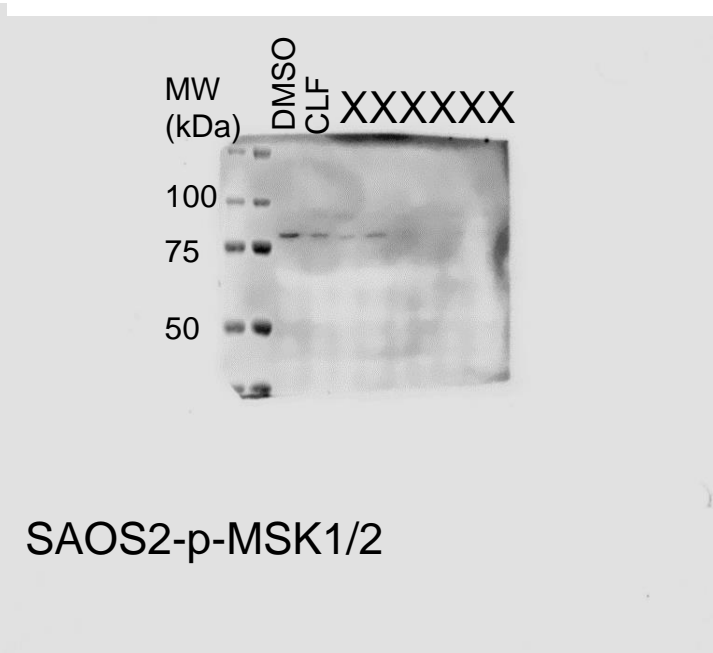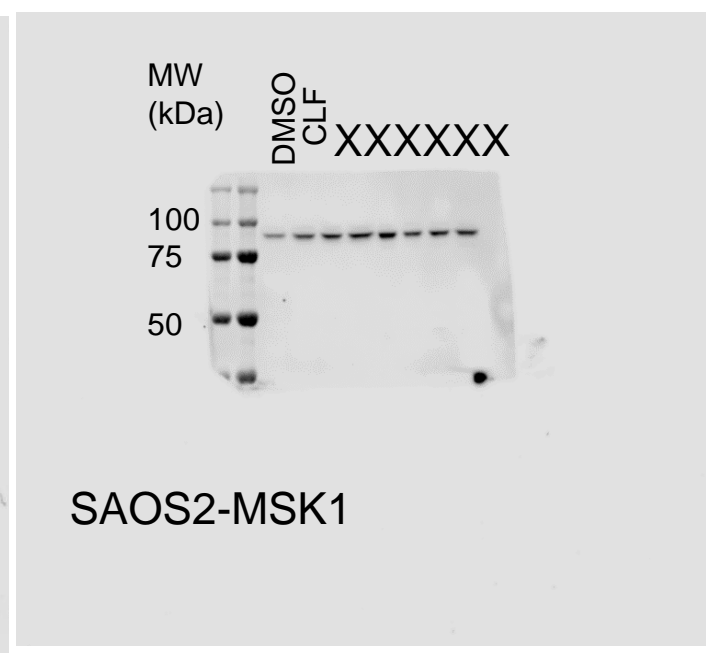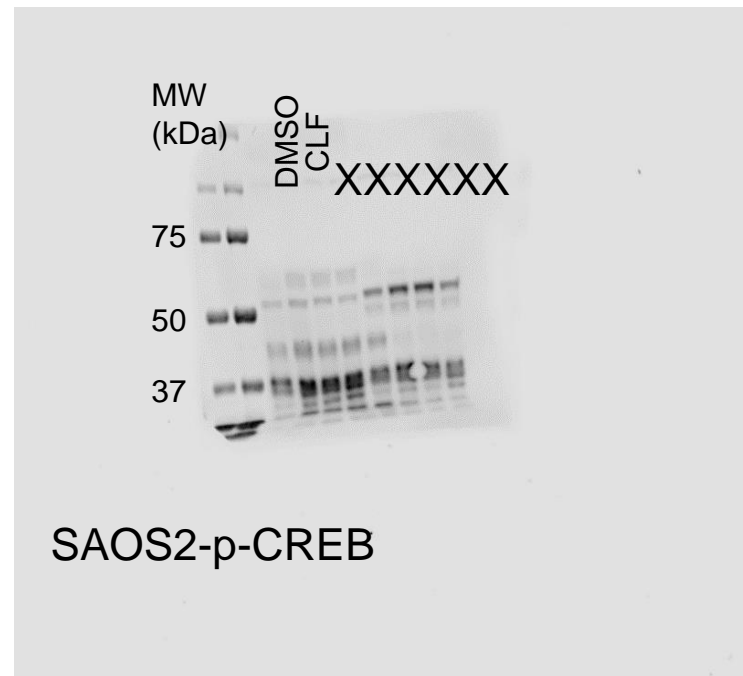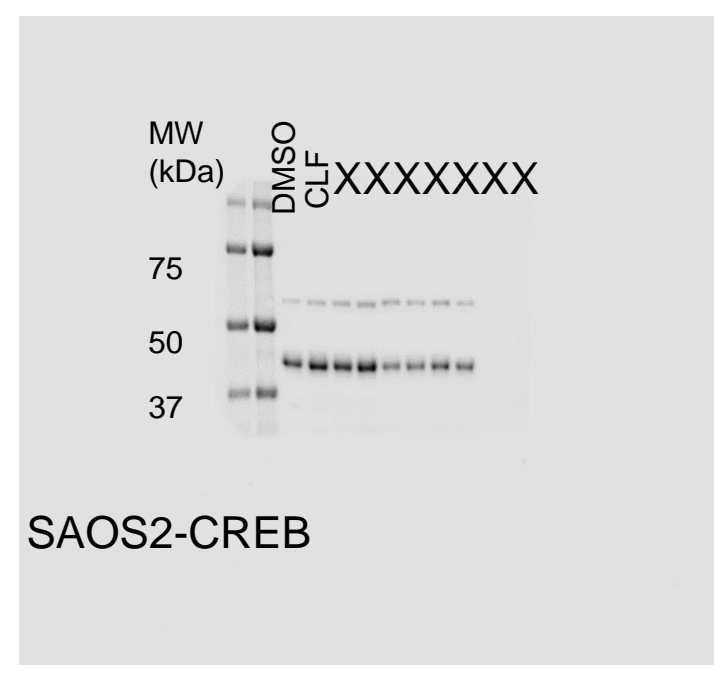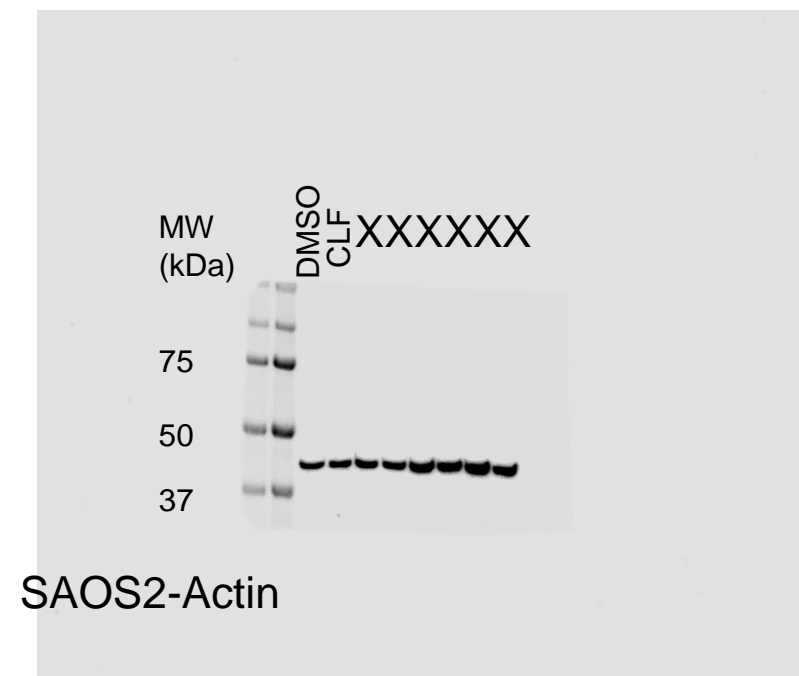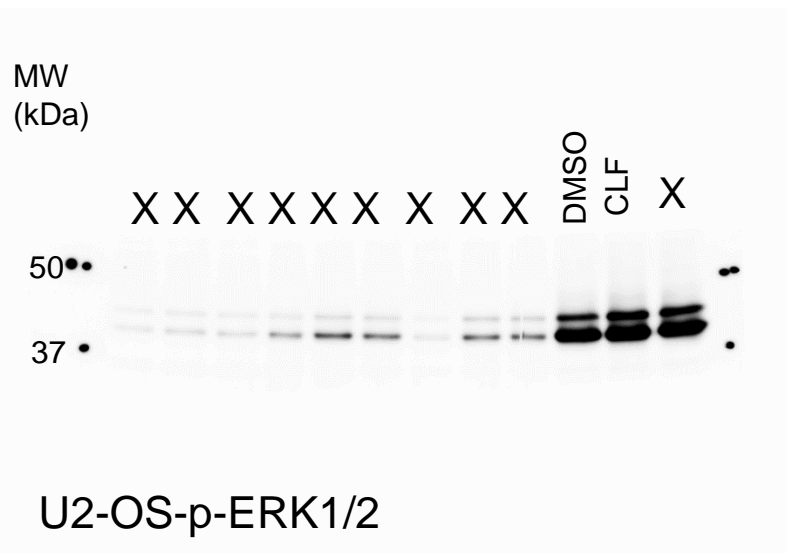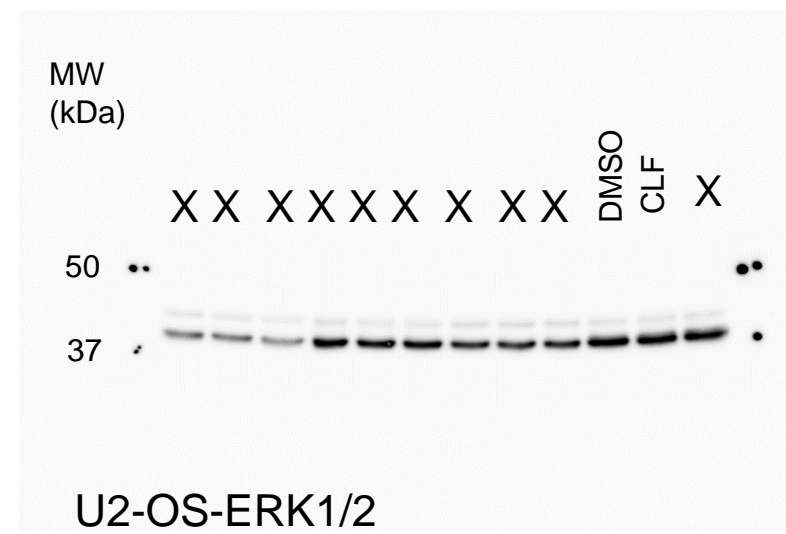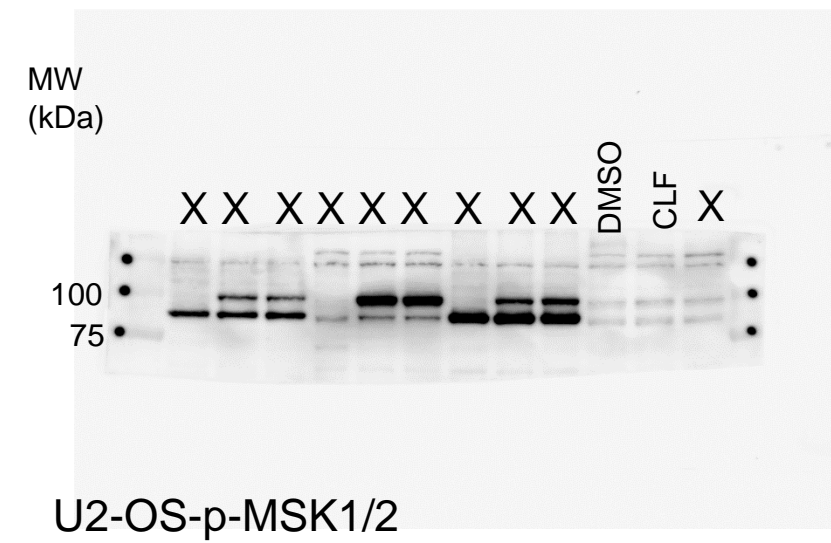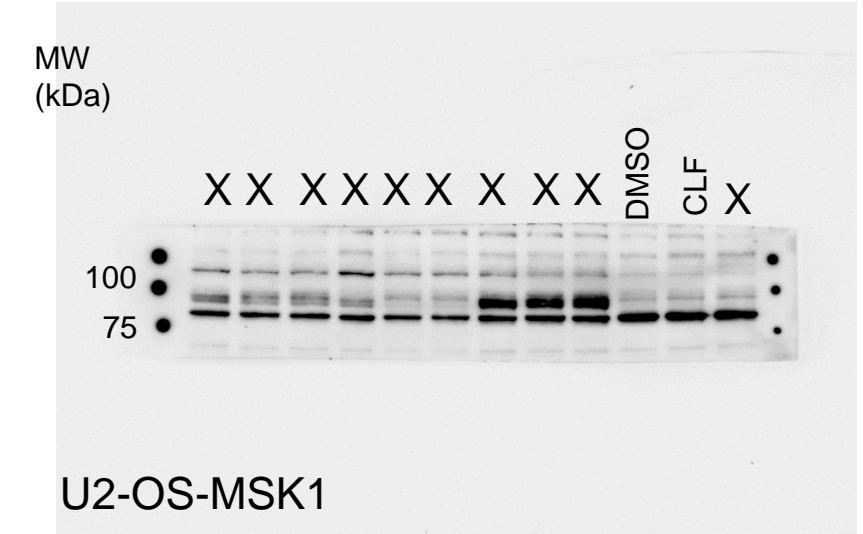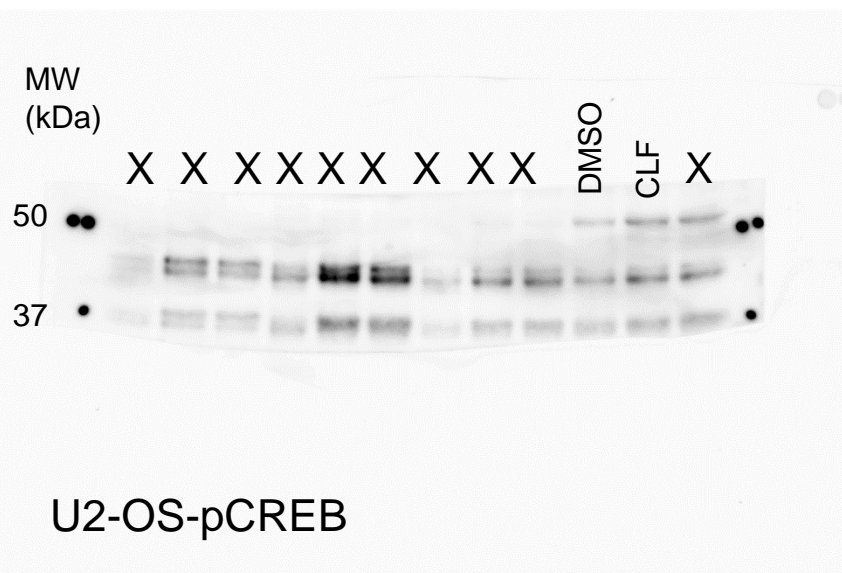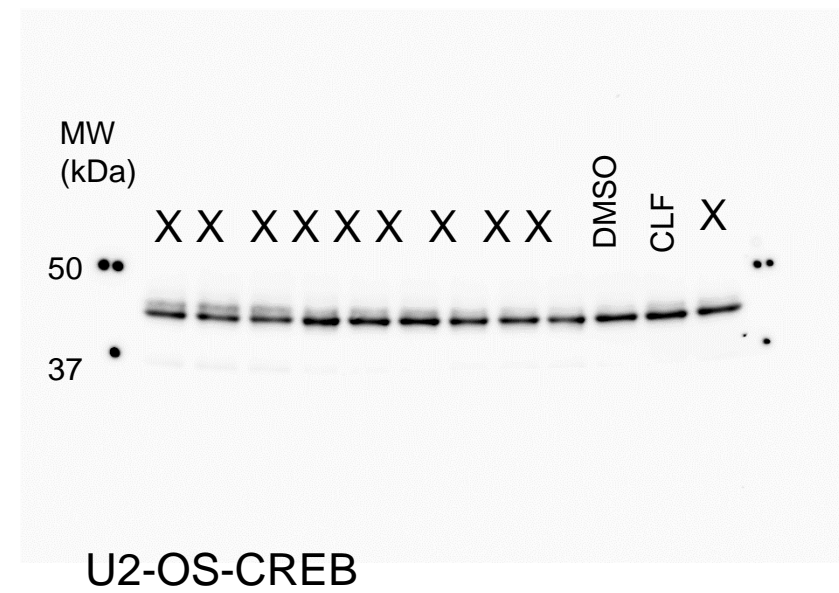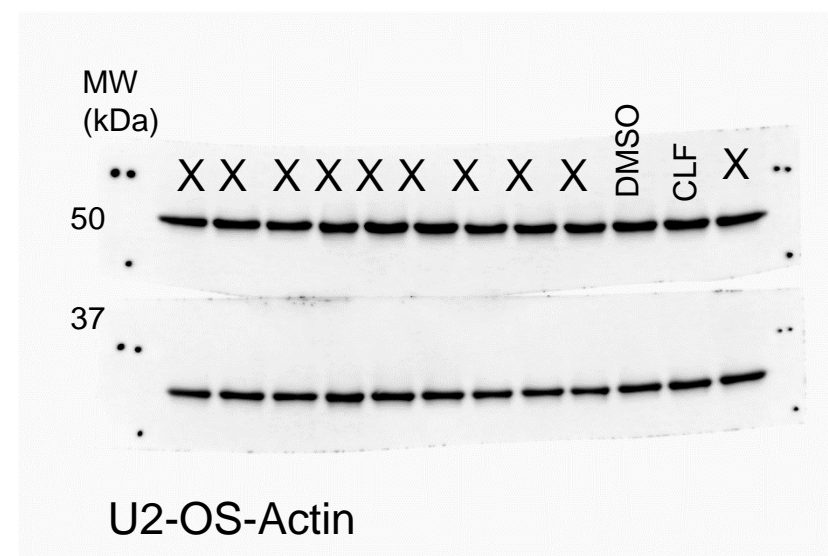

**Figure S1**

**A**

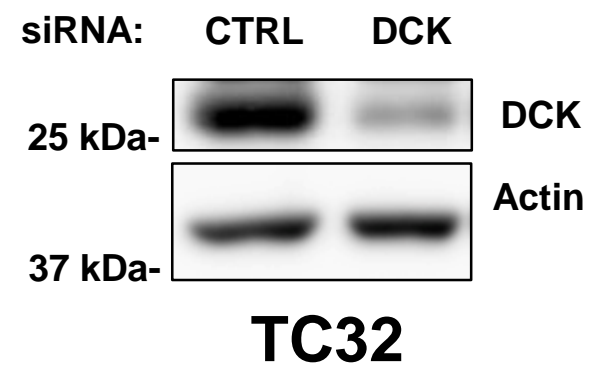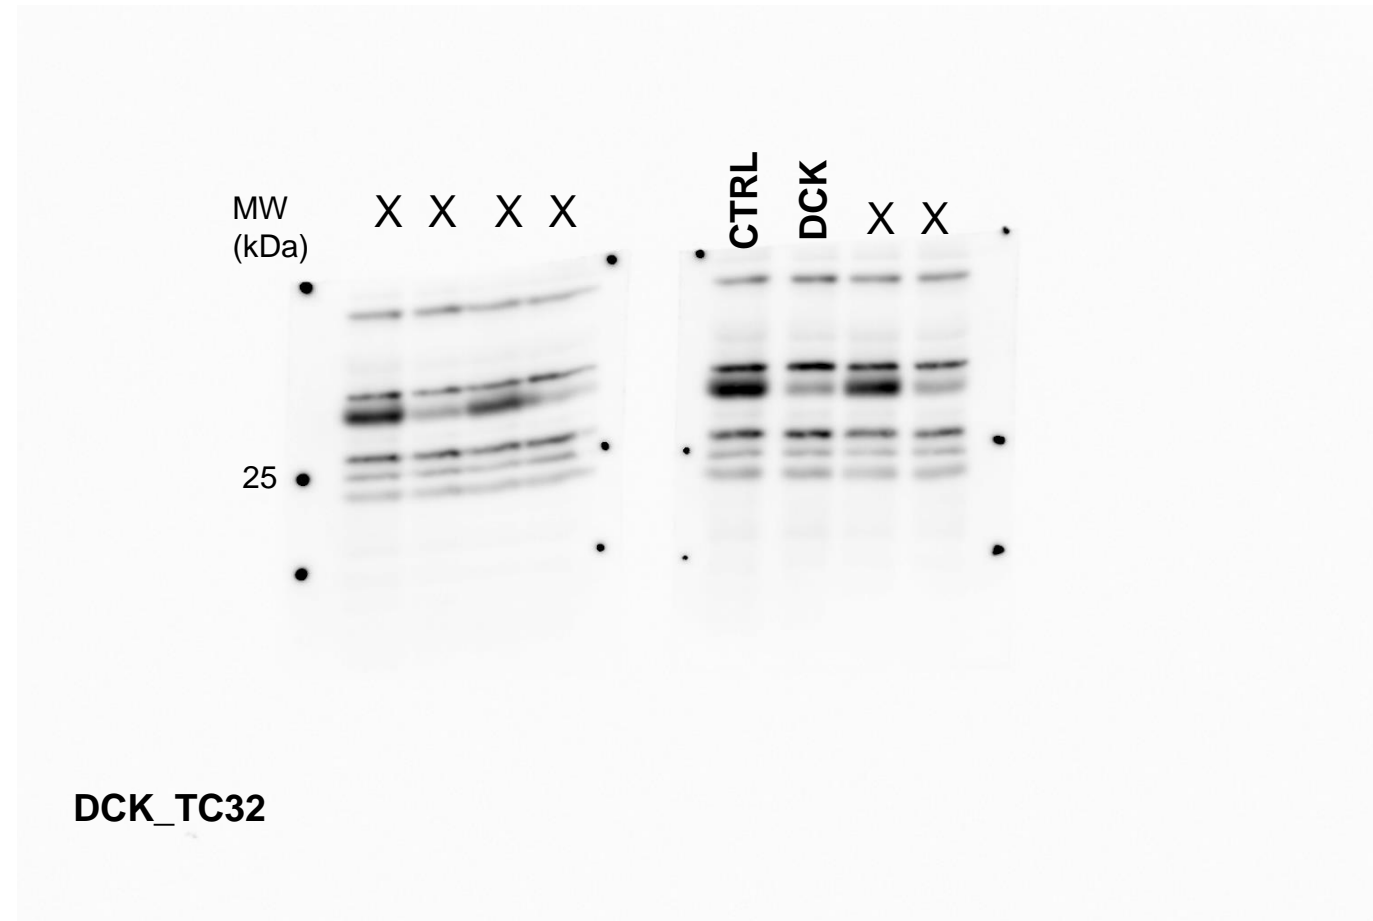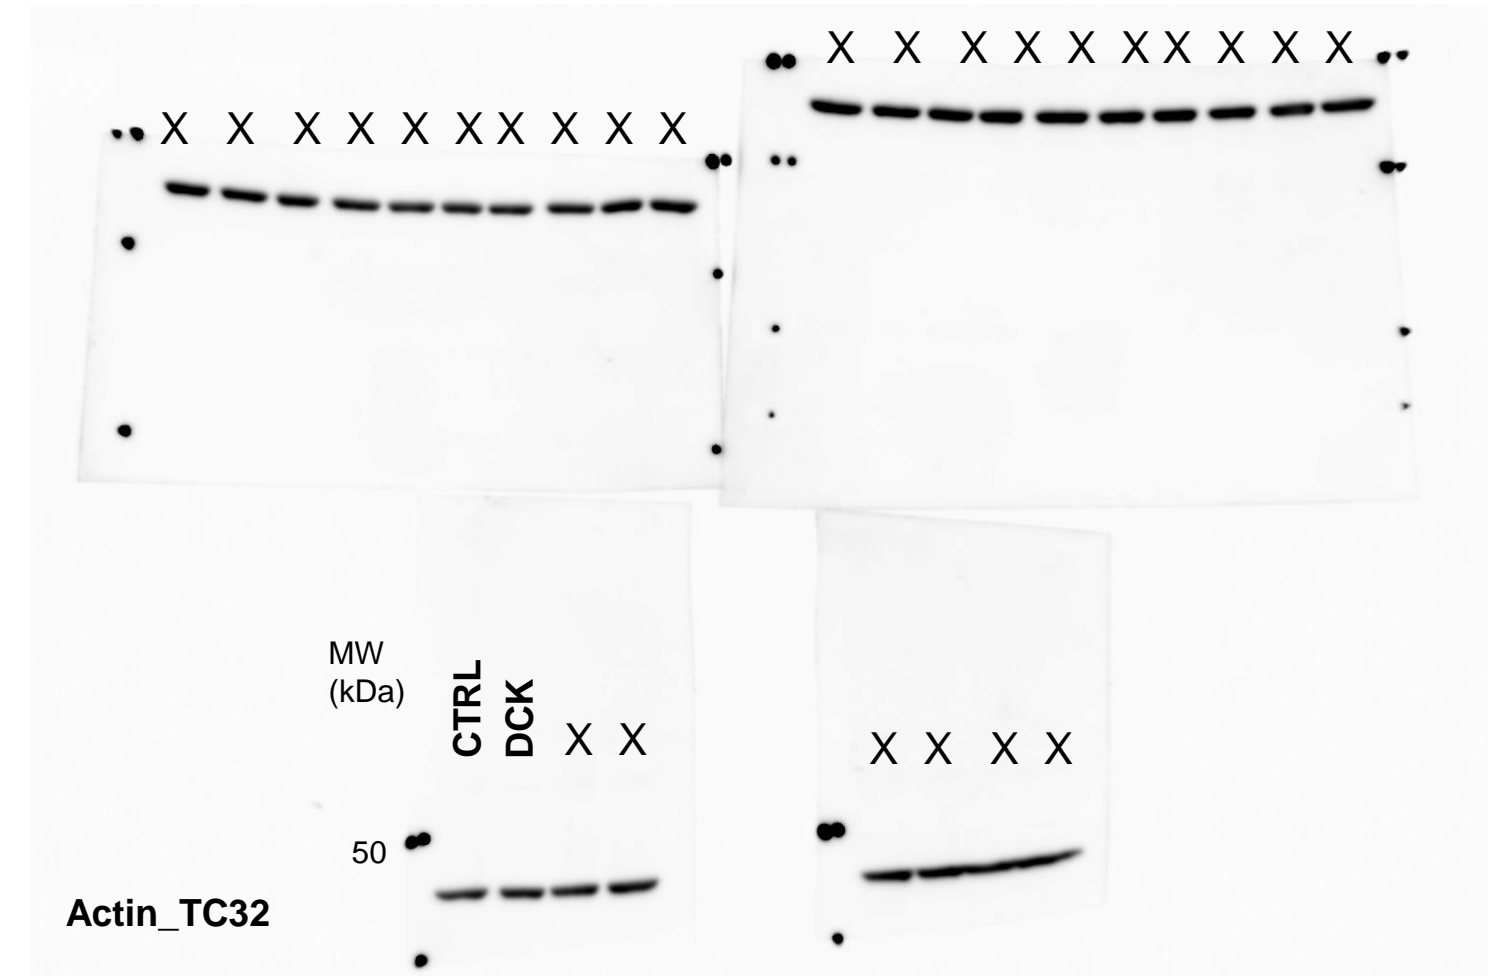

**B**

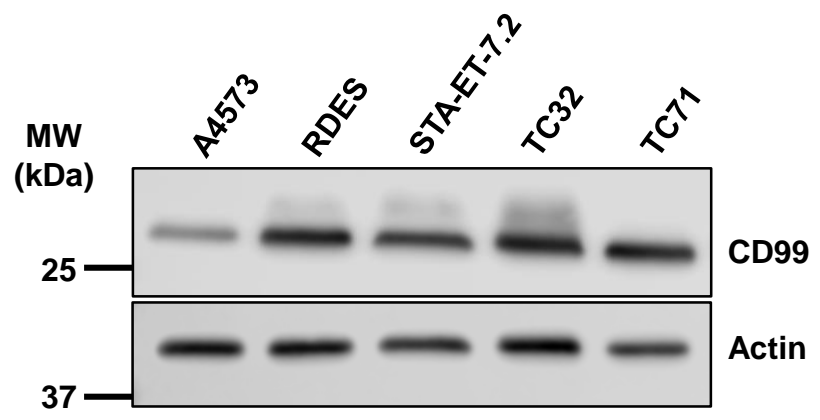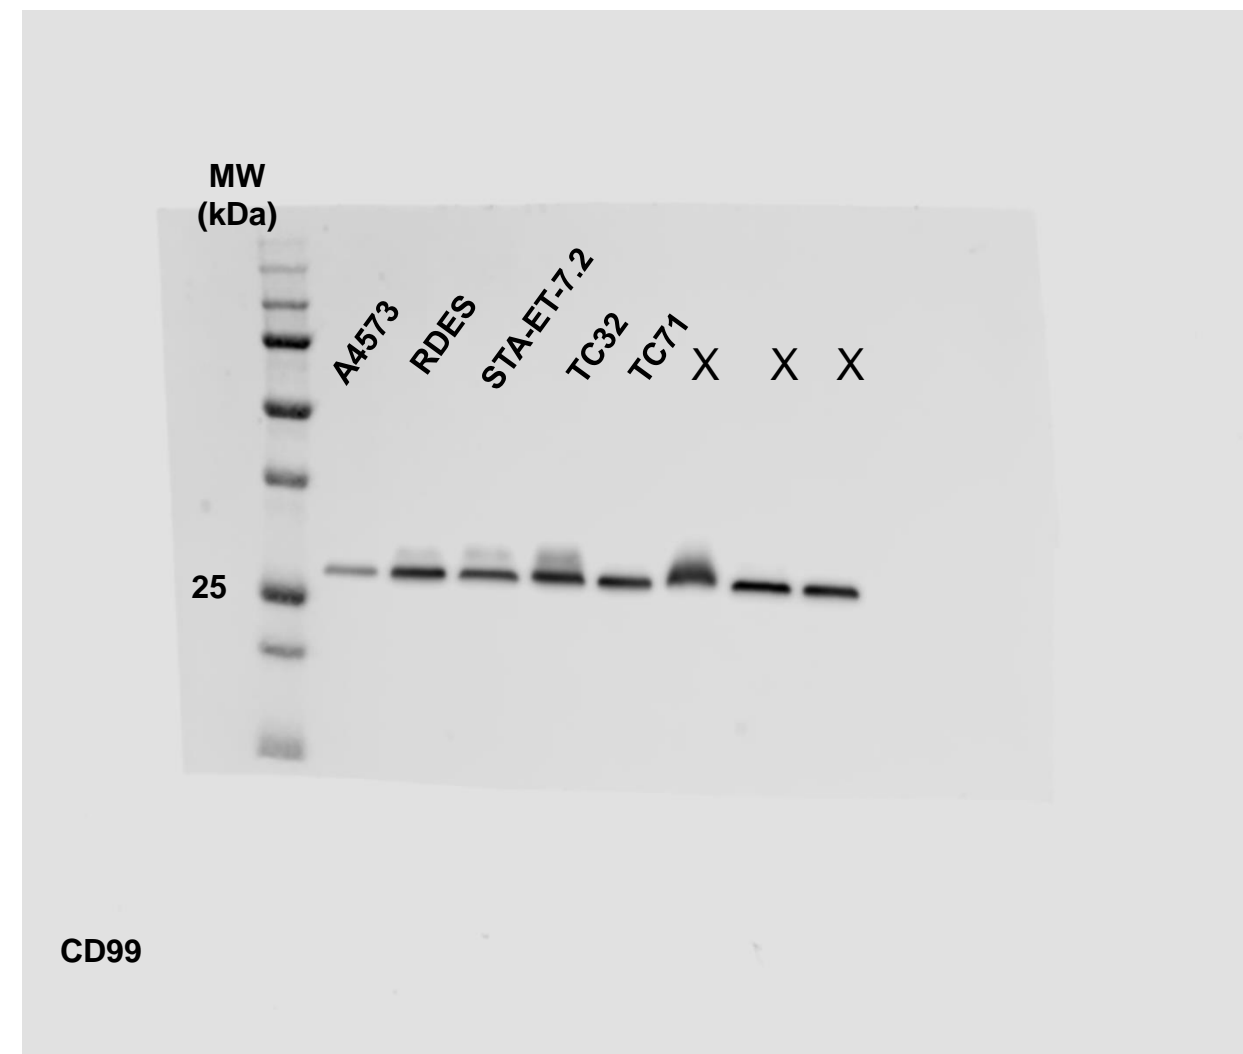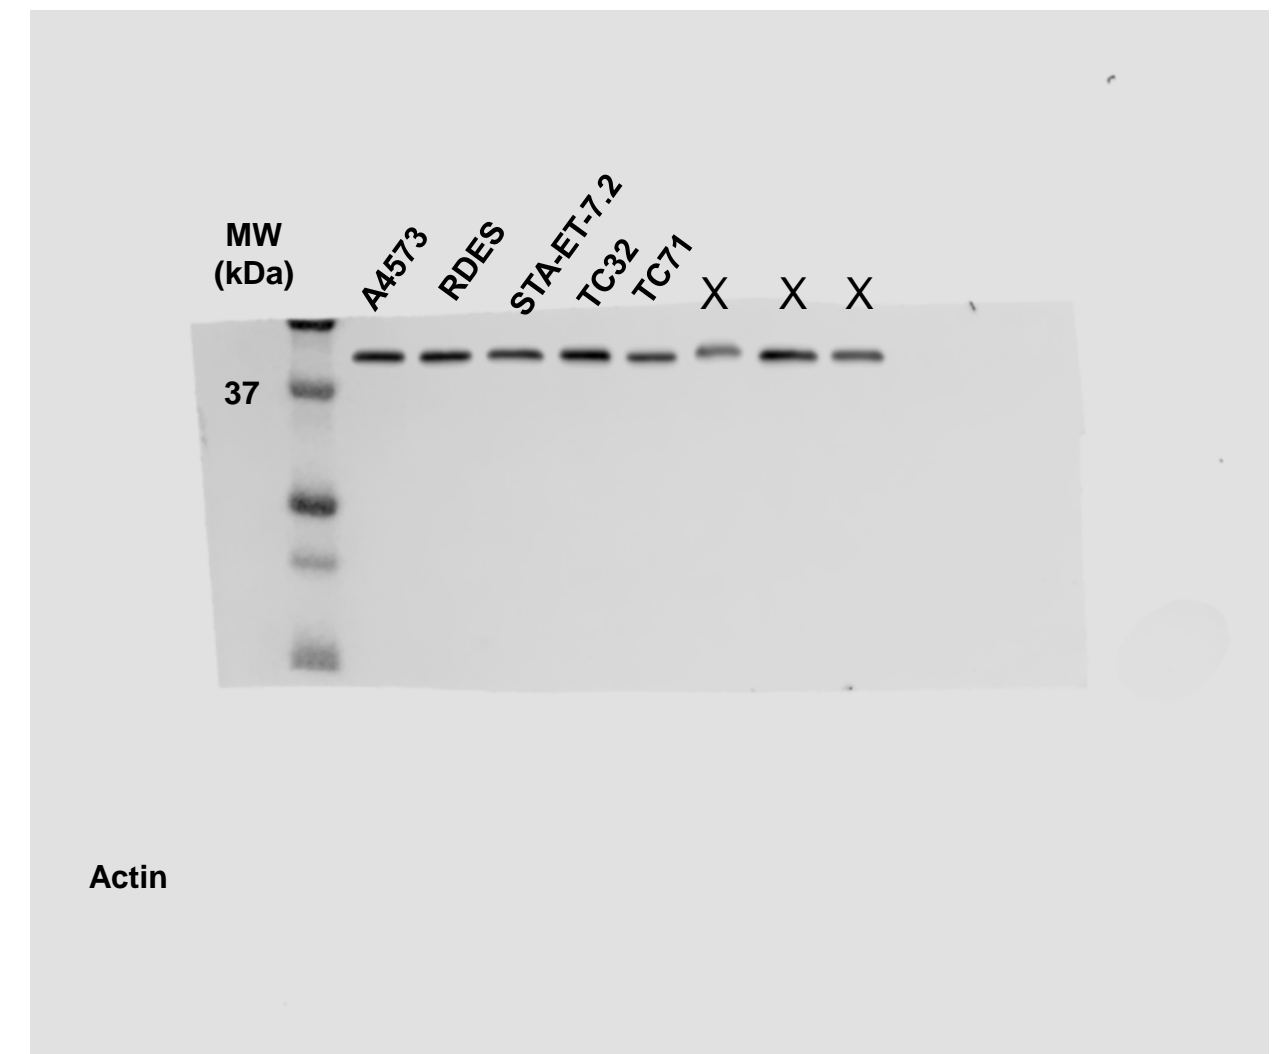



# Sup Figure3A

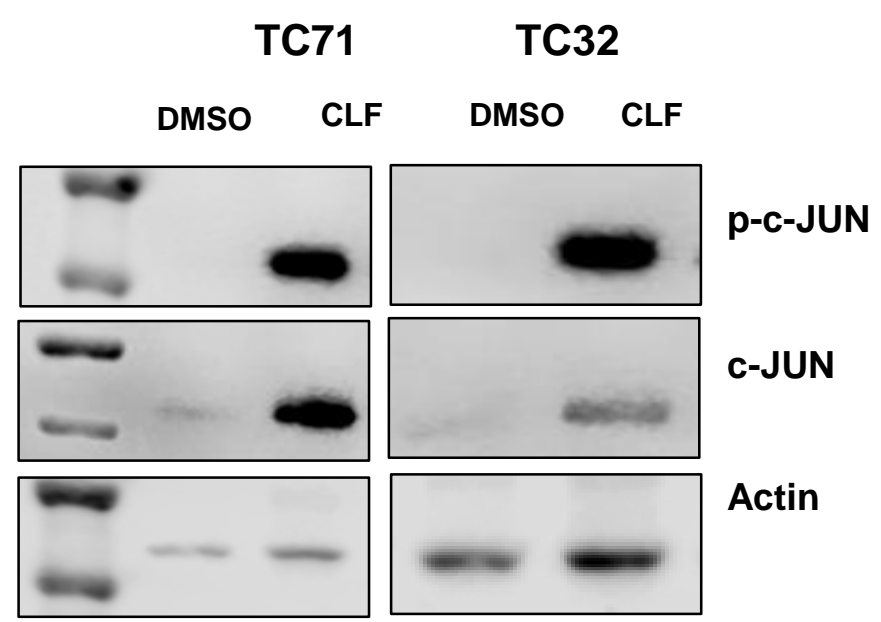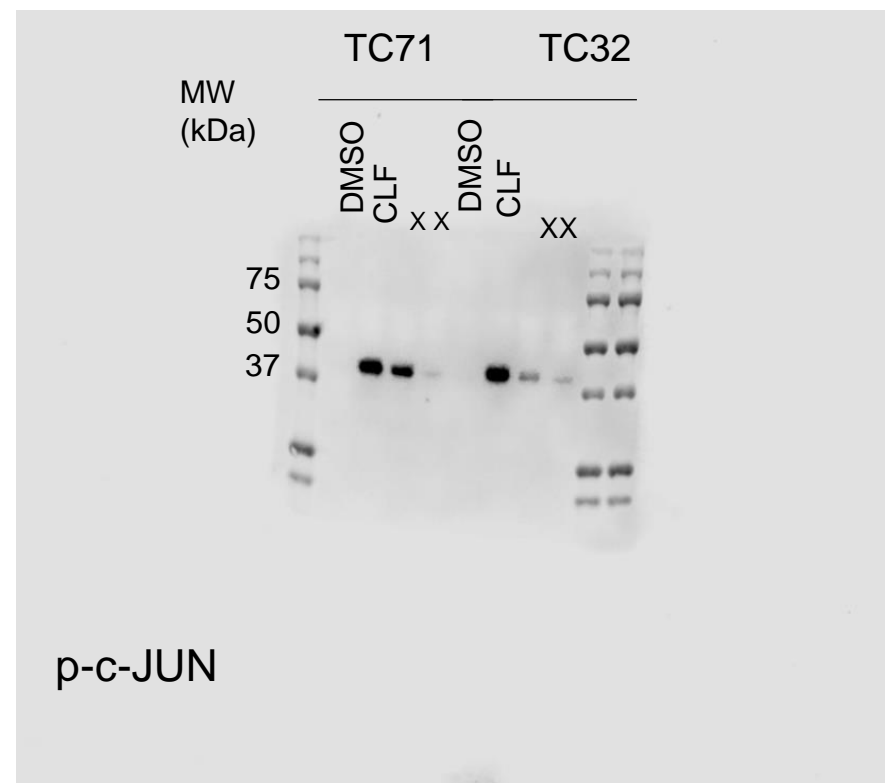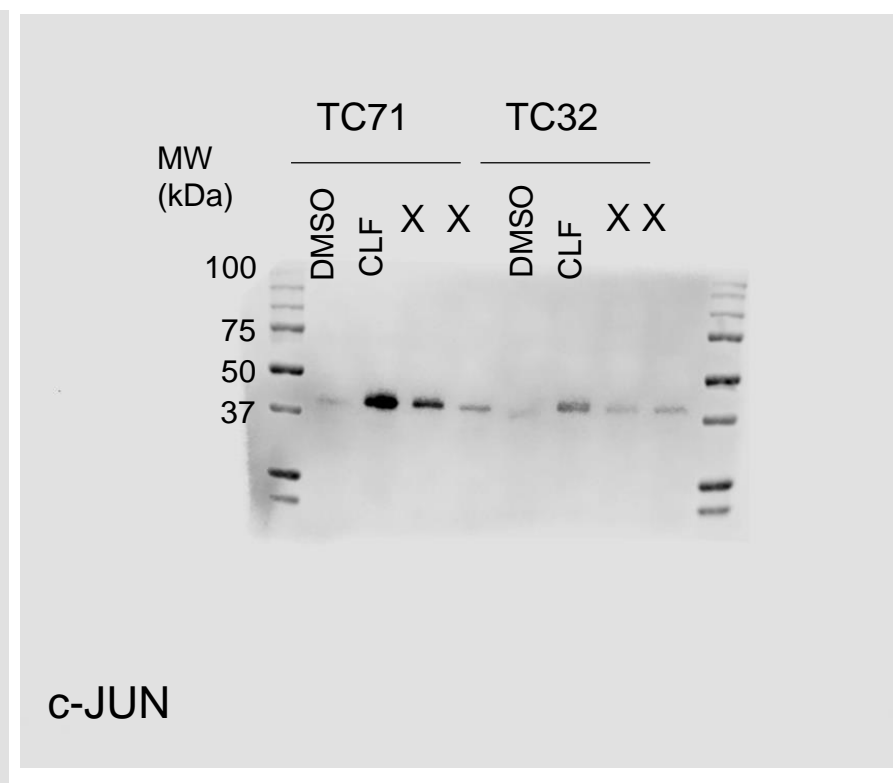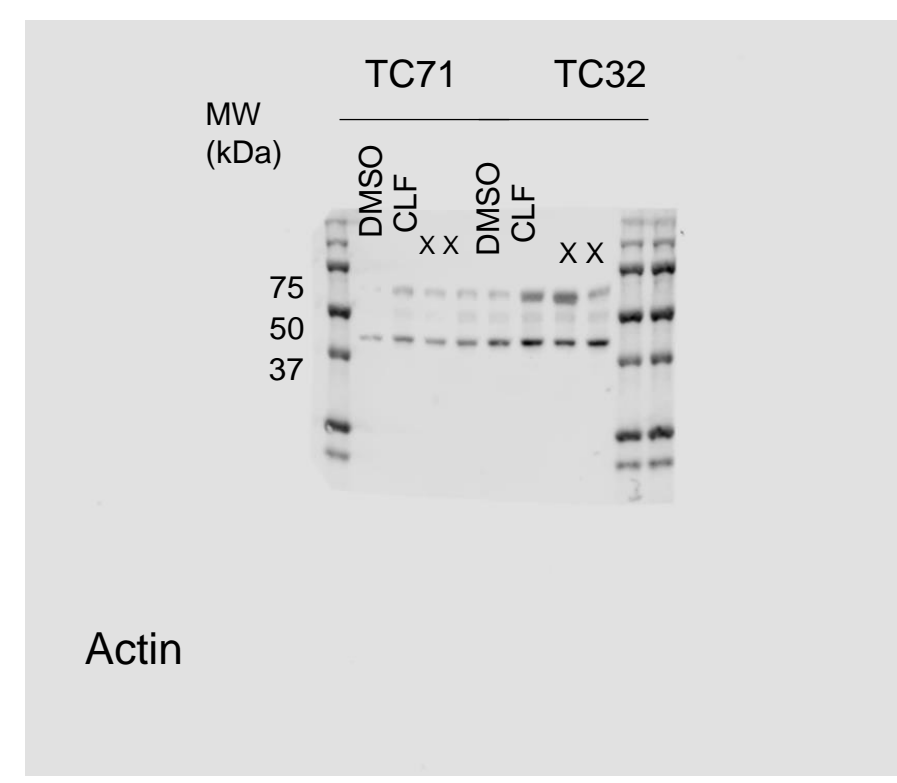

# Sup Figure3B

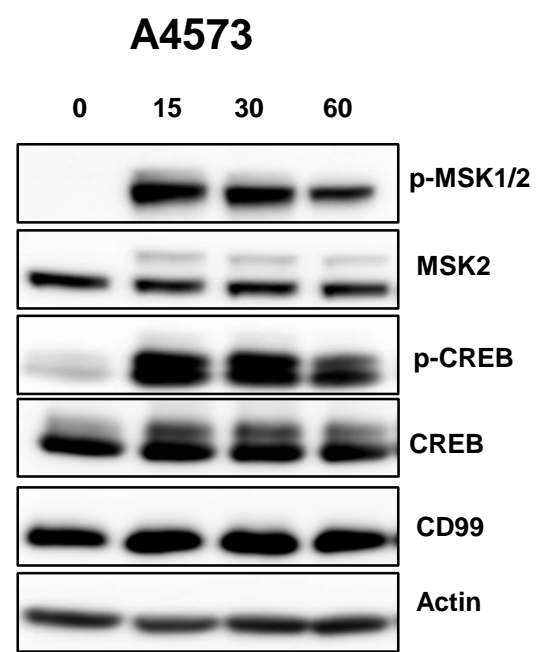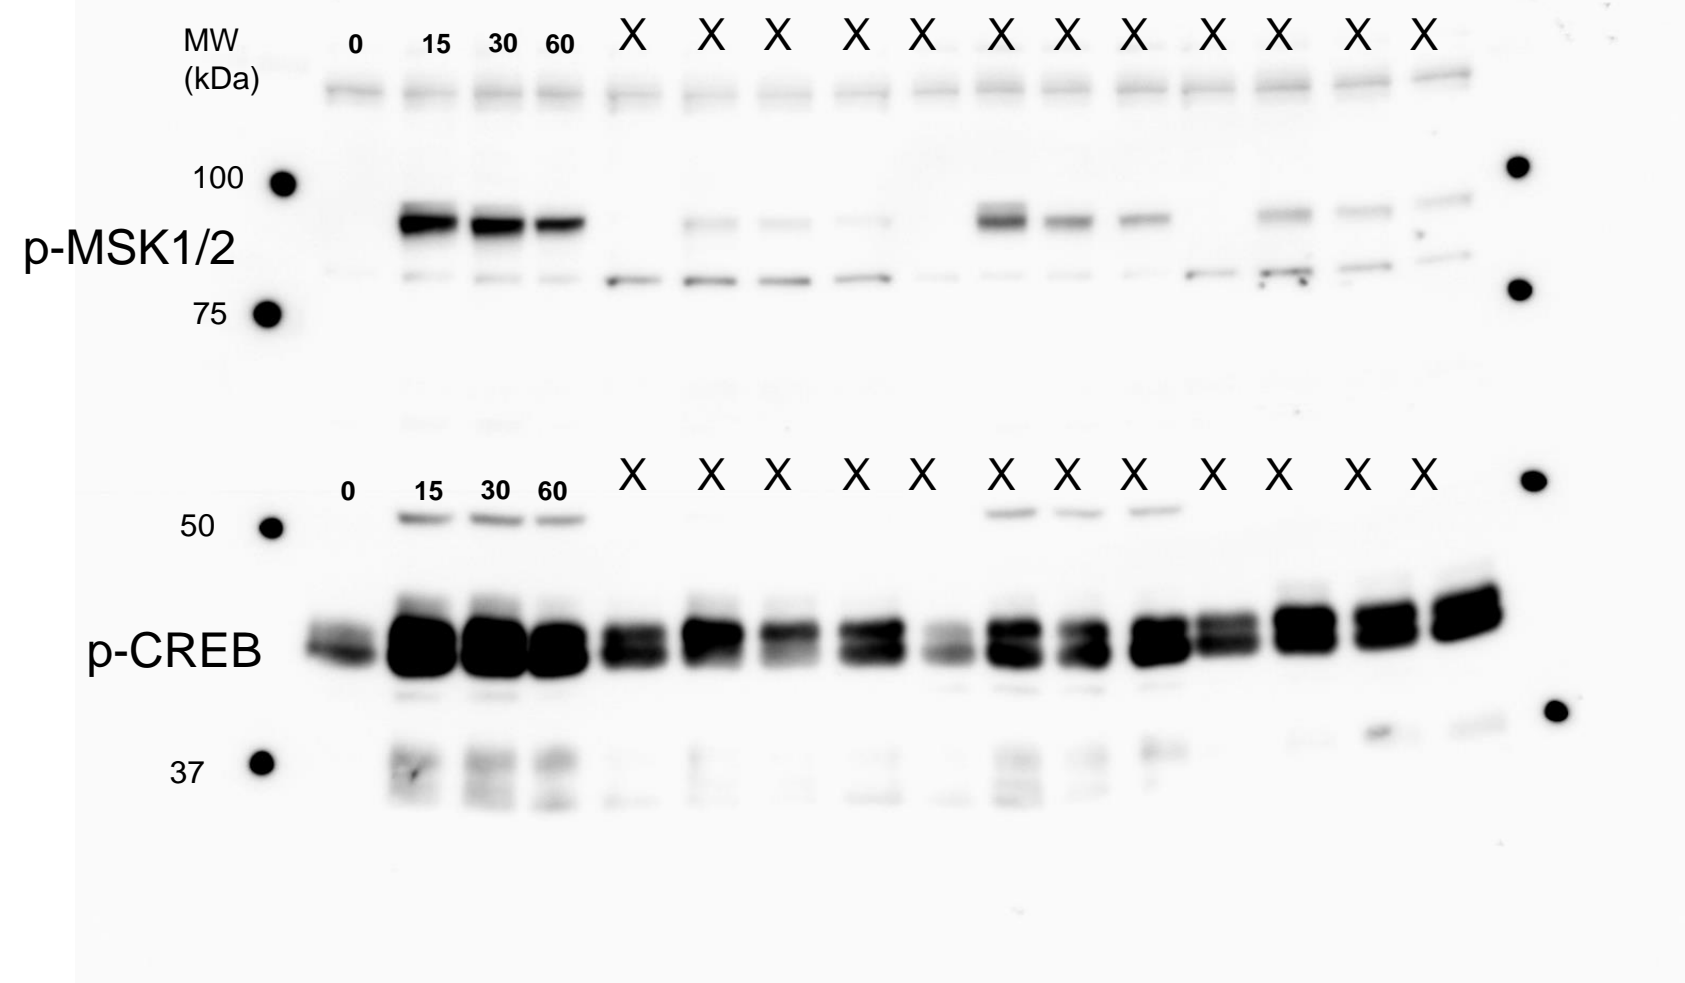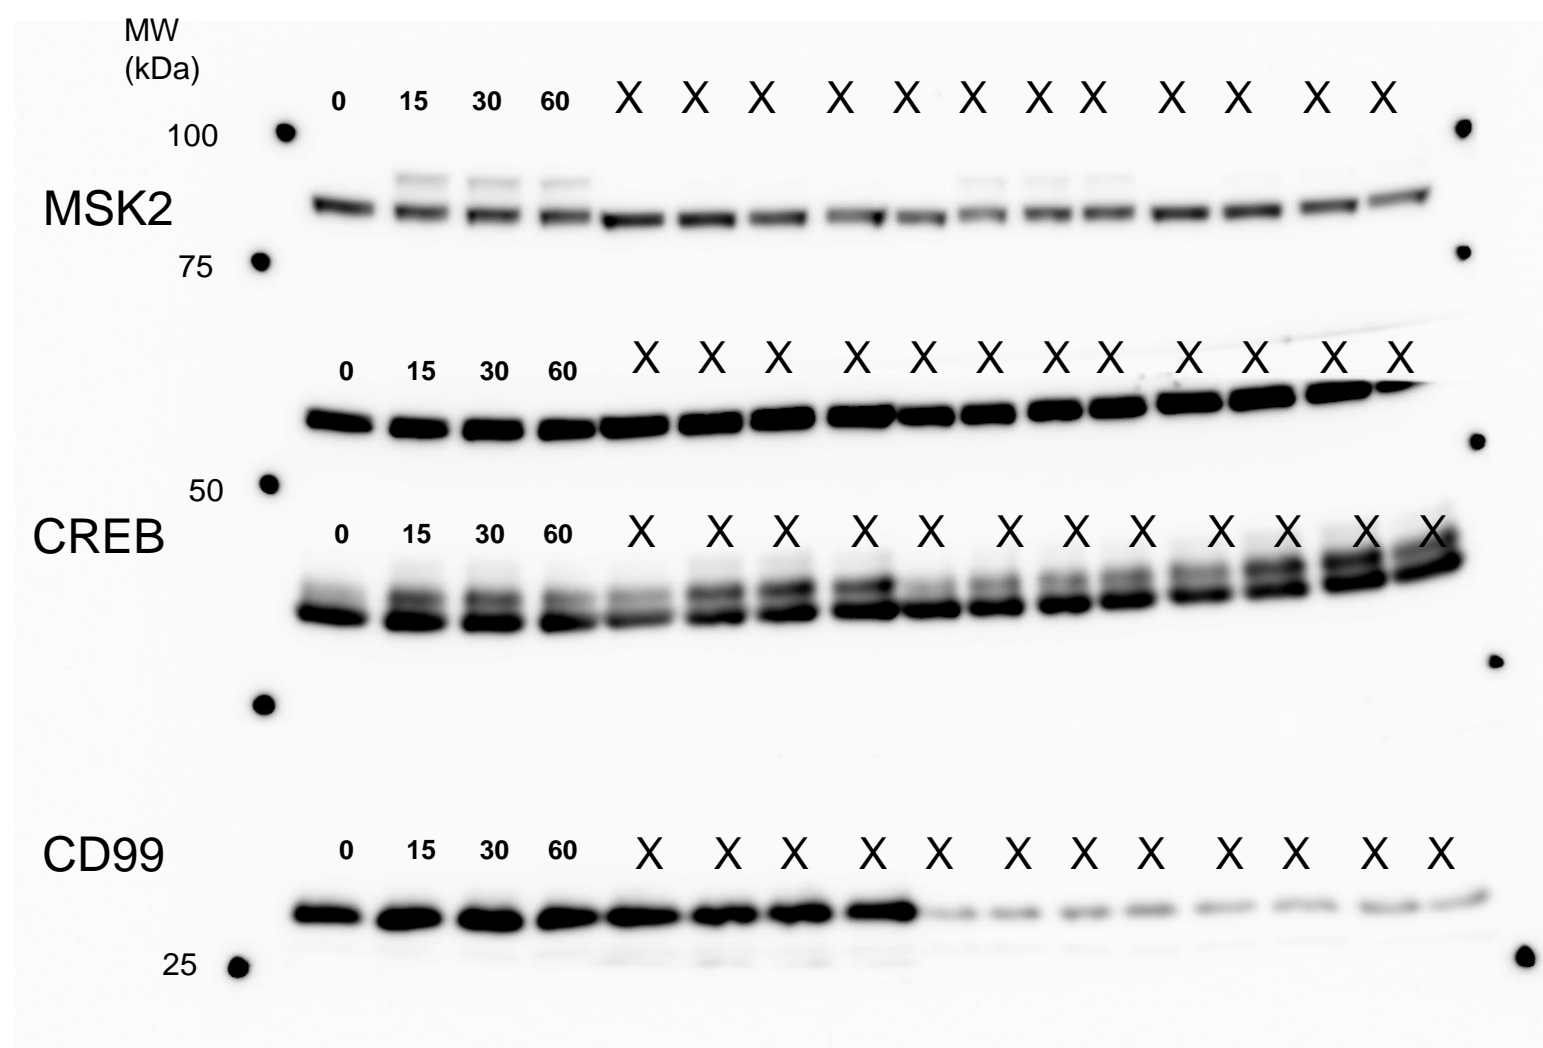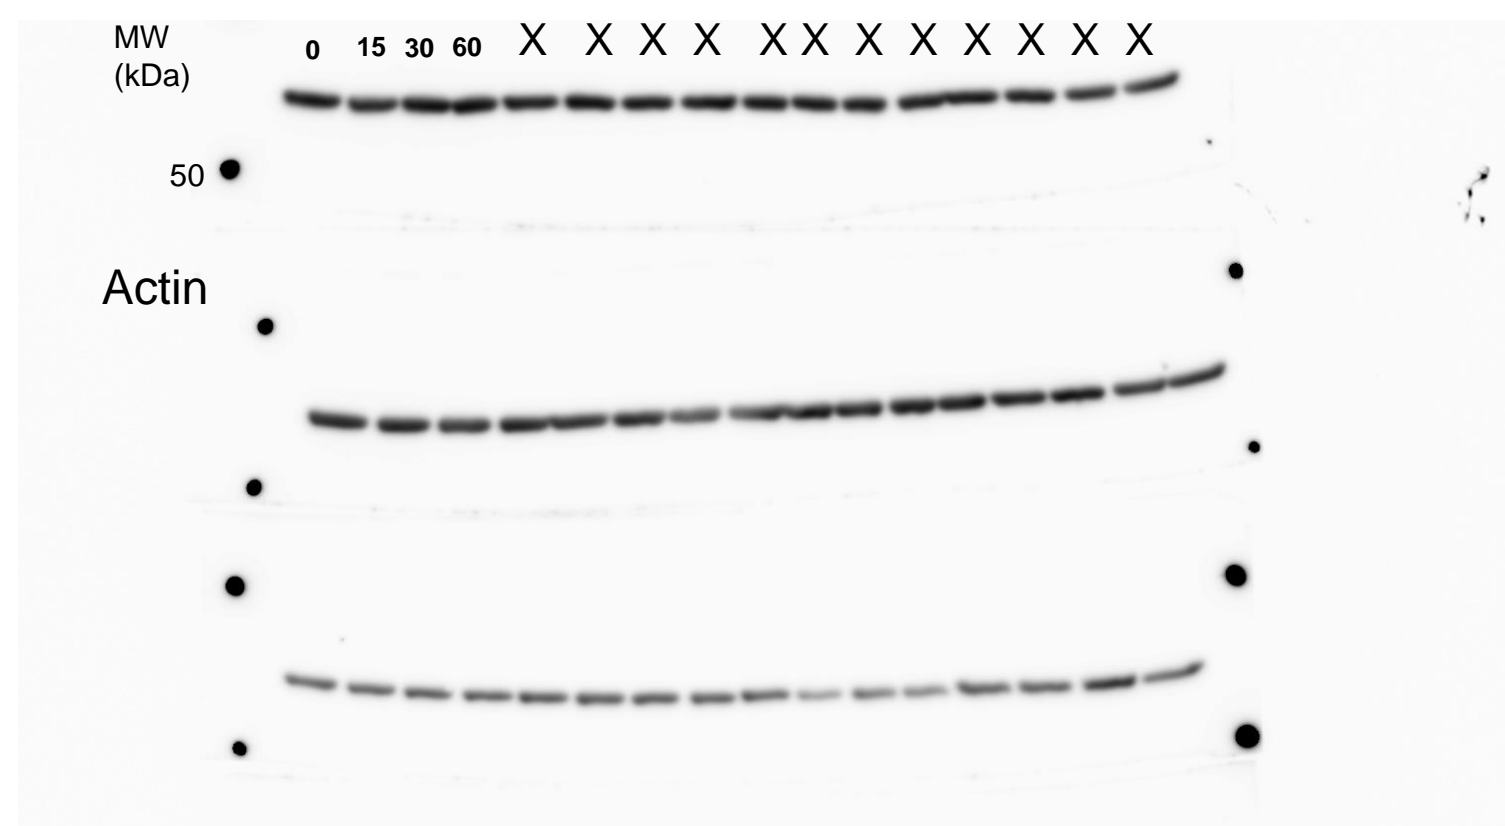

# Sup Figure3C

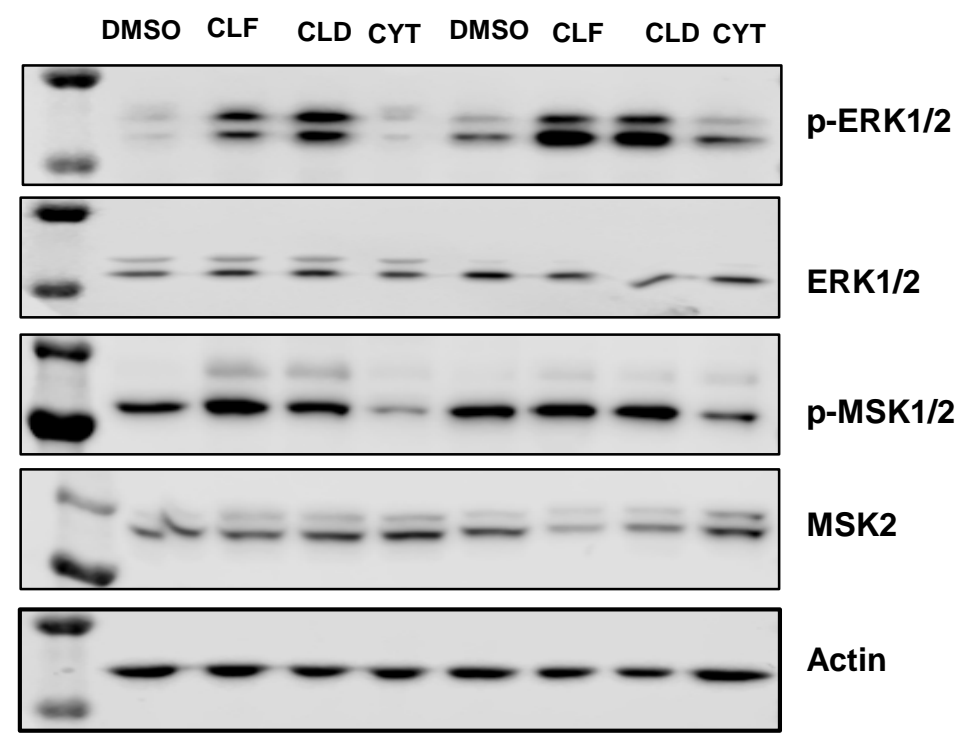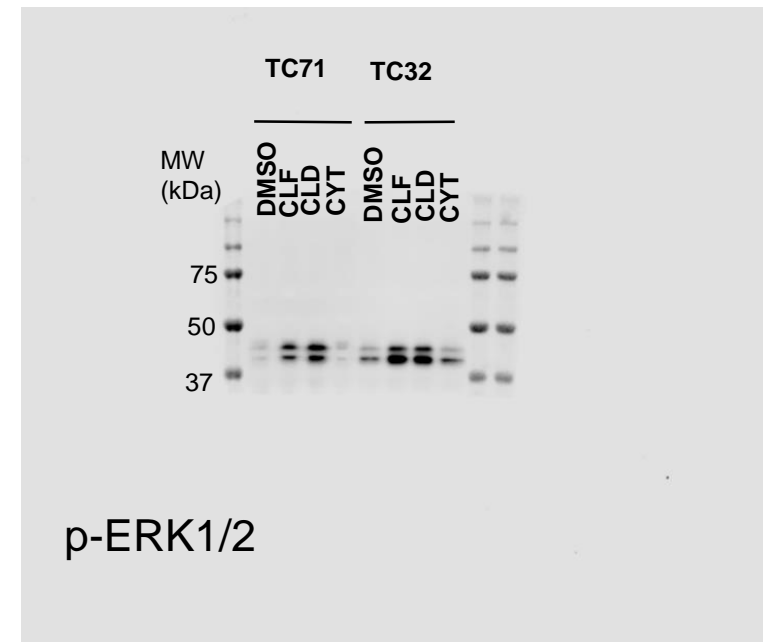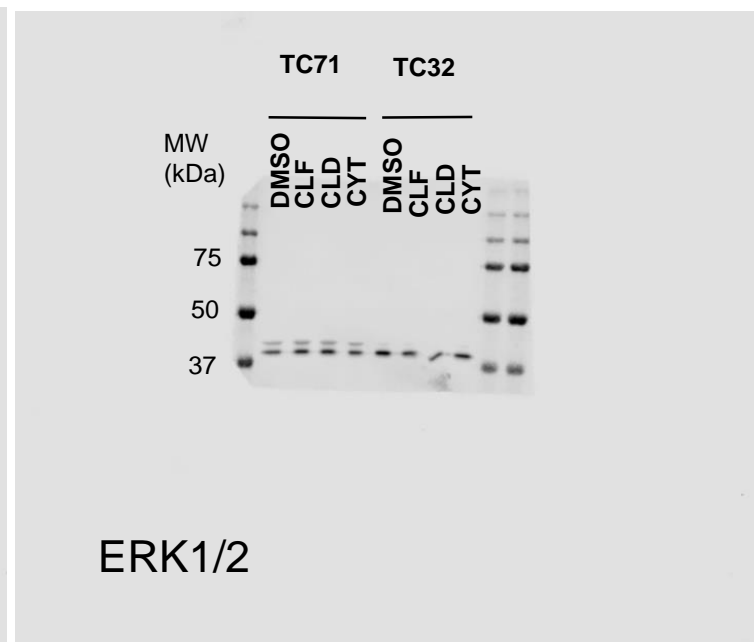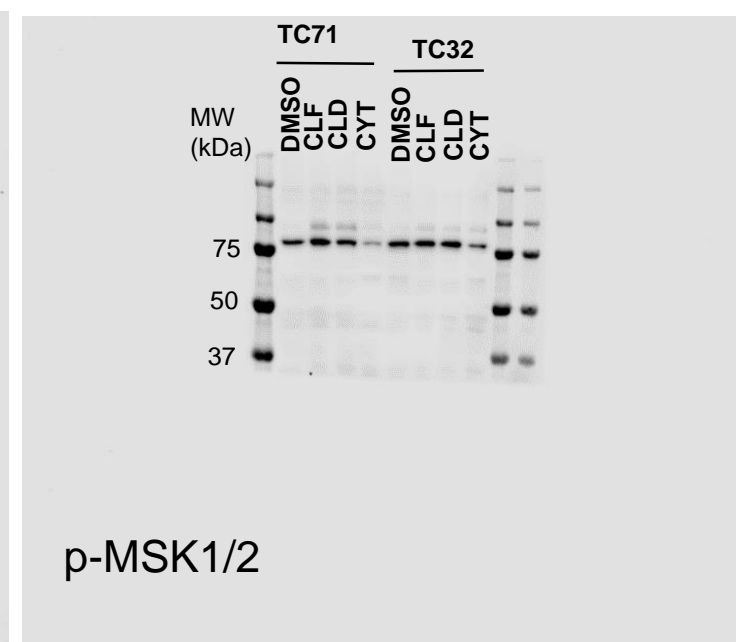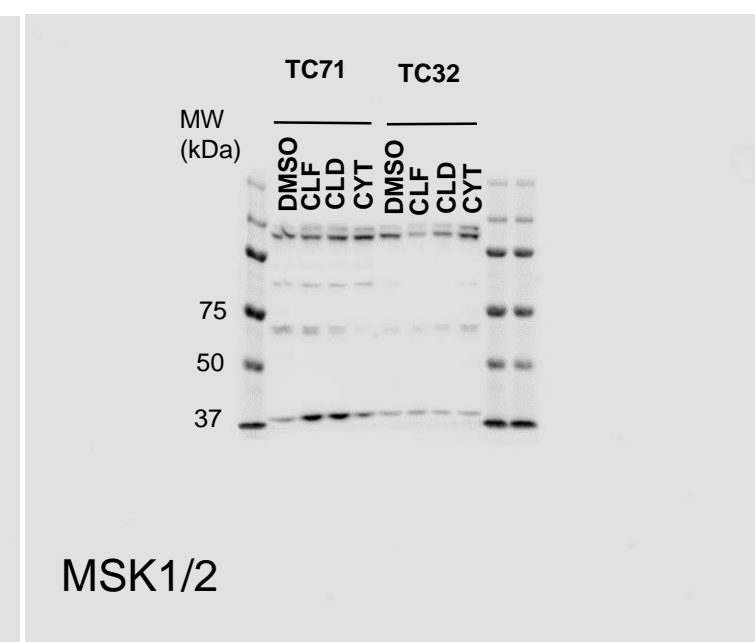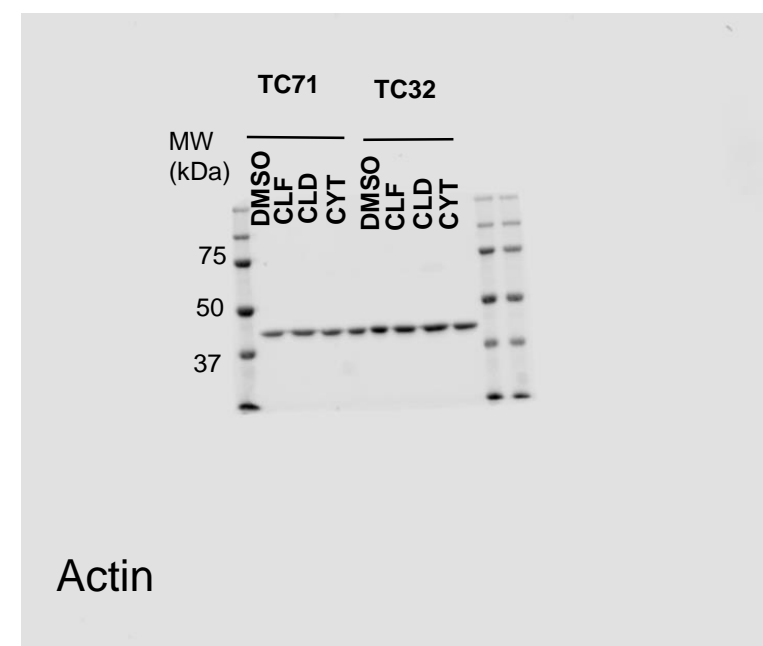



Figure S5A

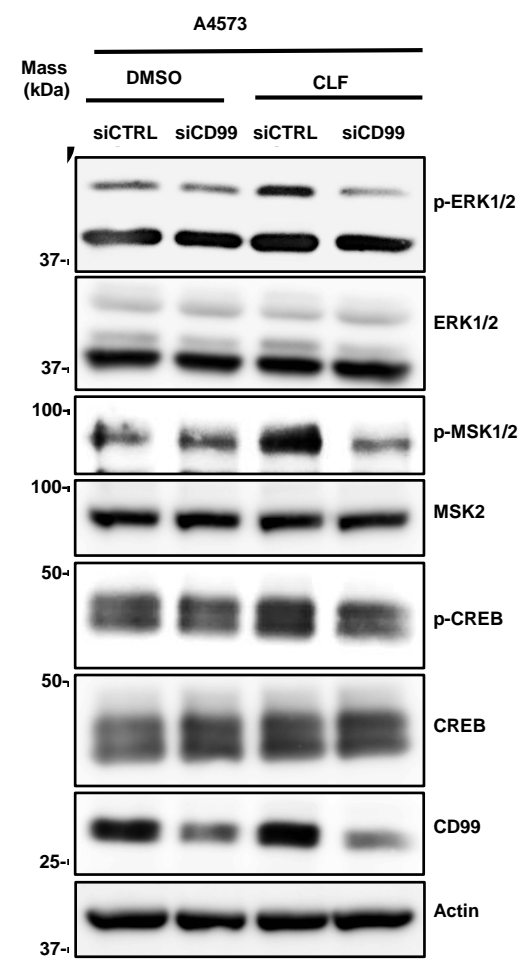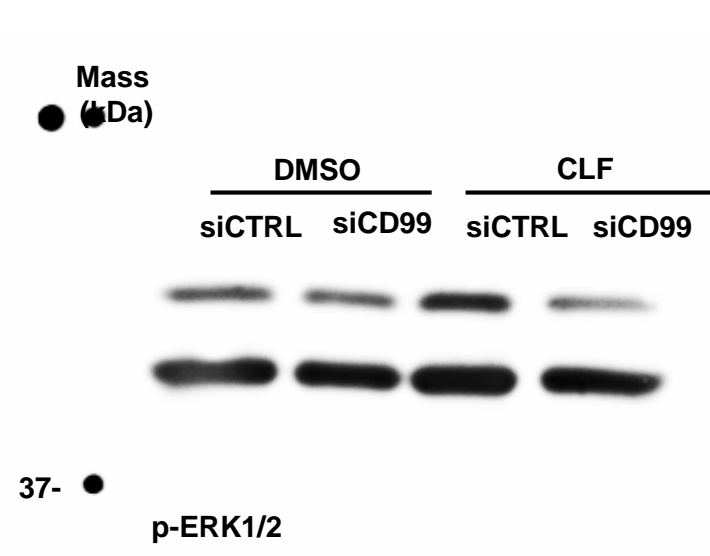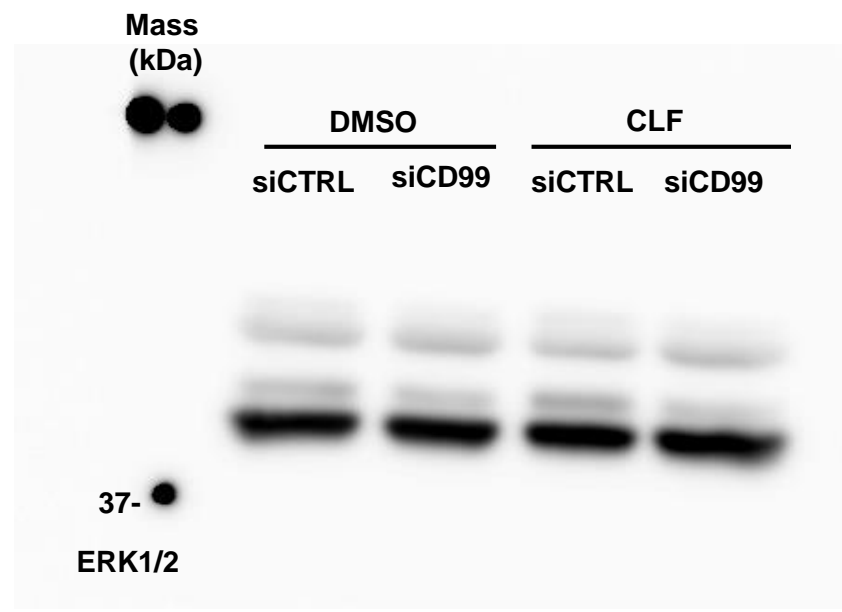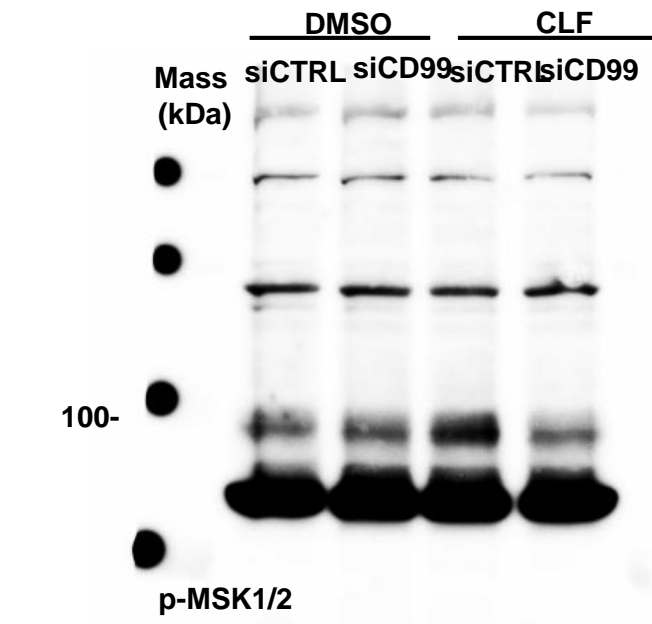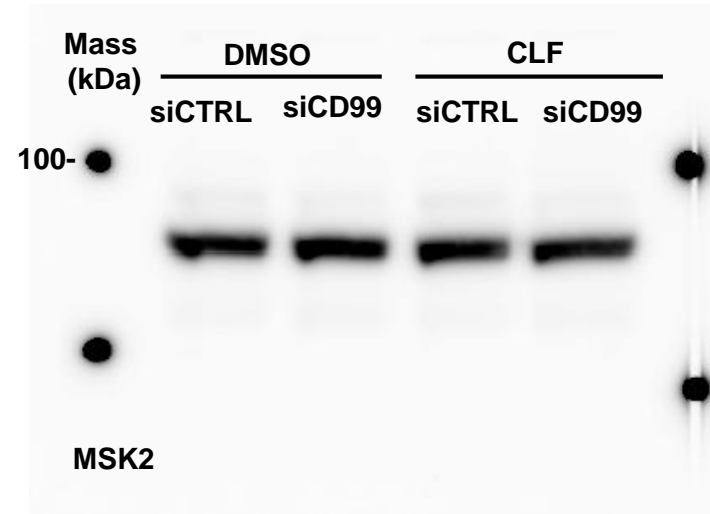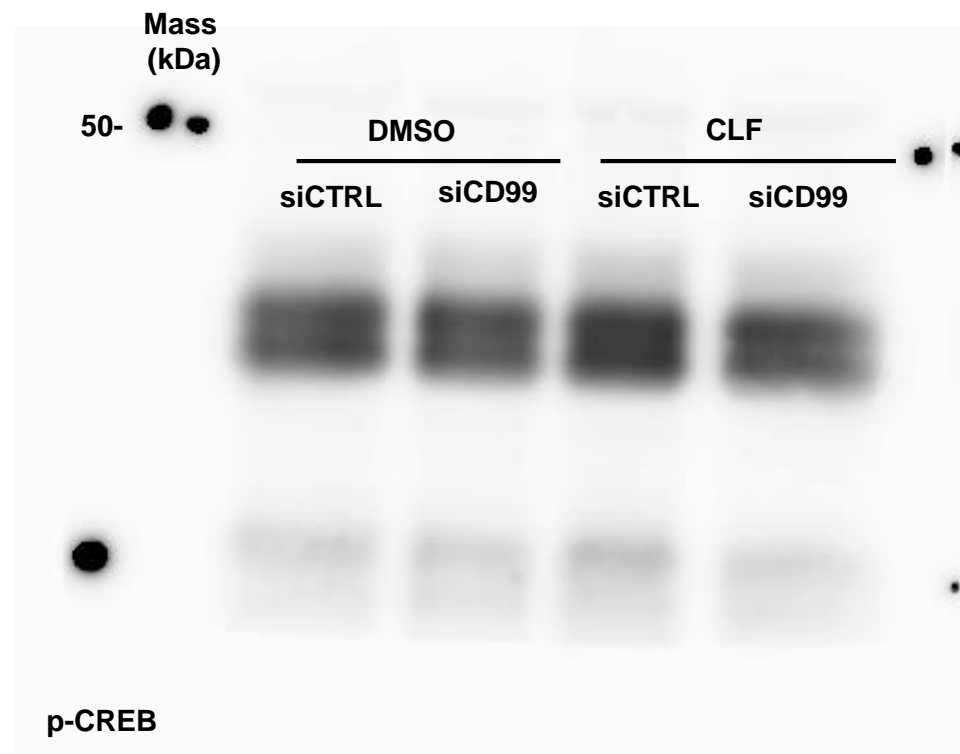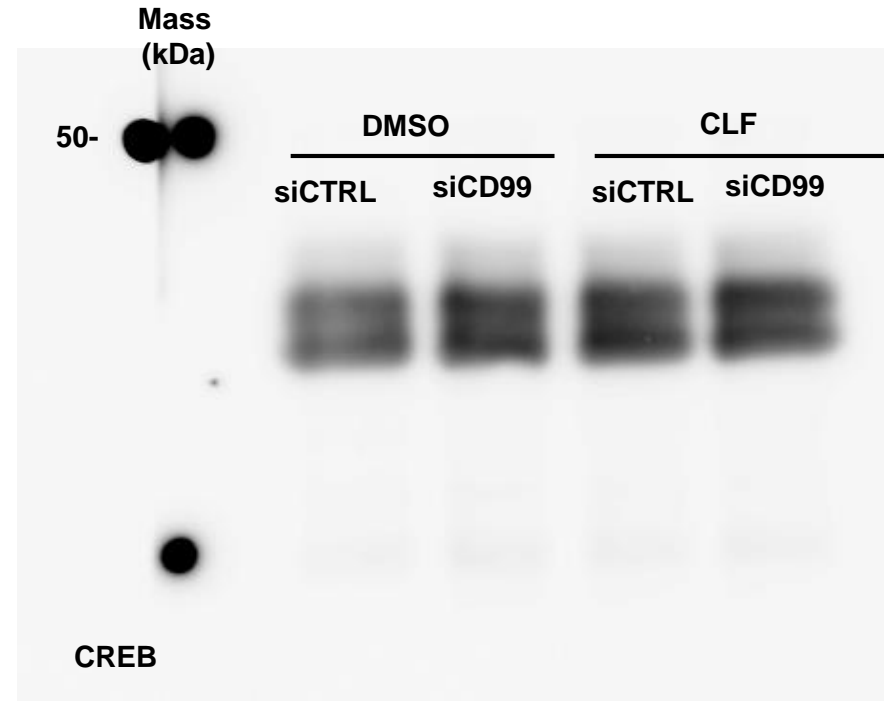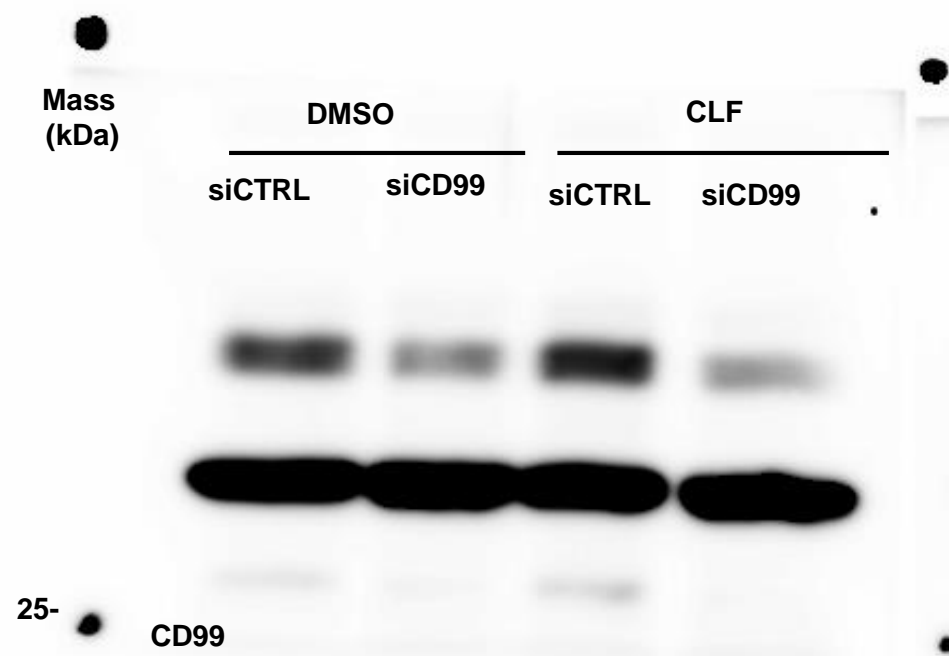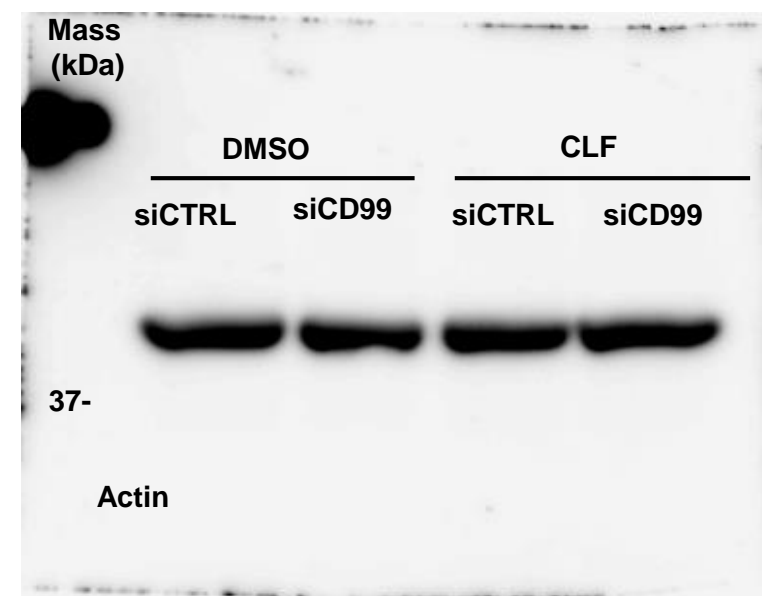

Figure S5B

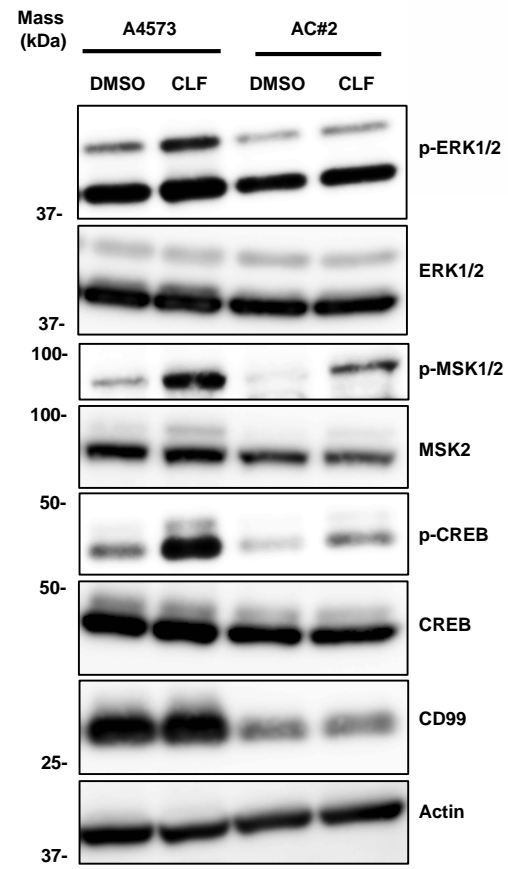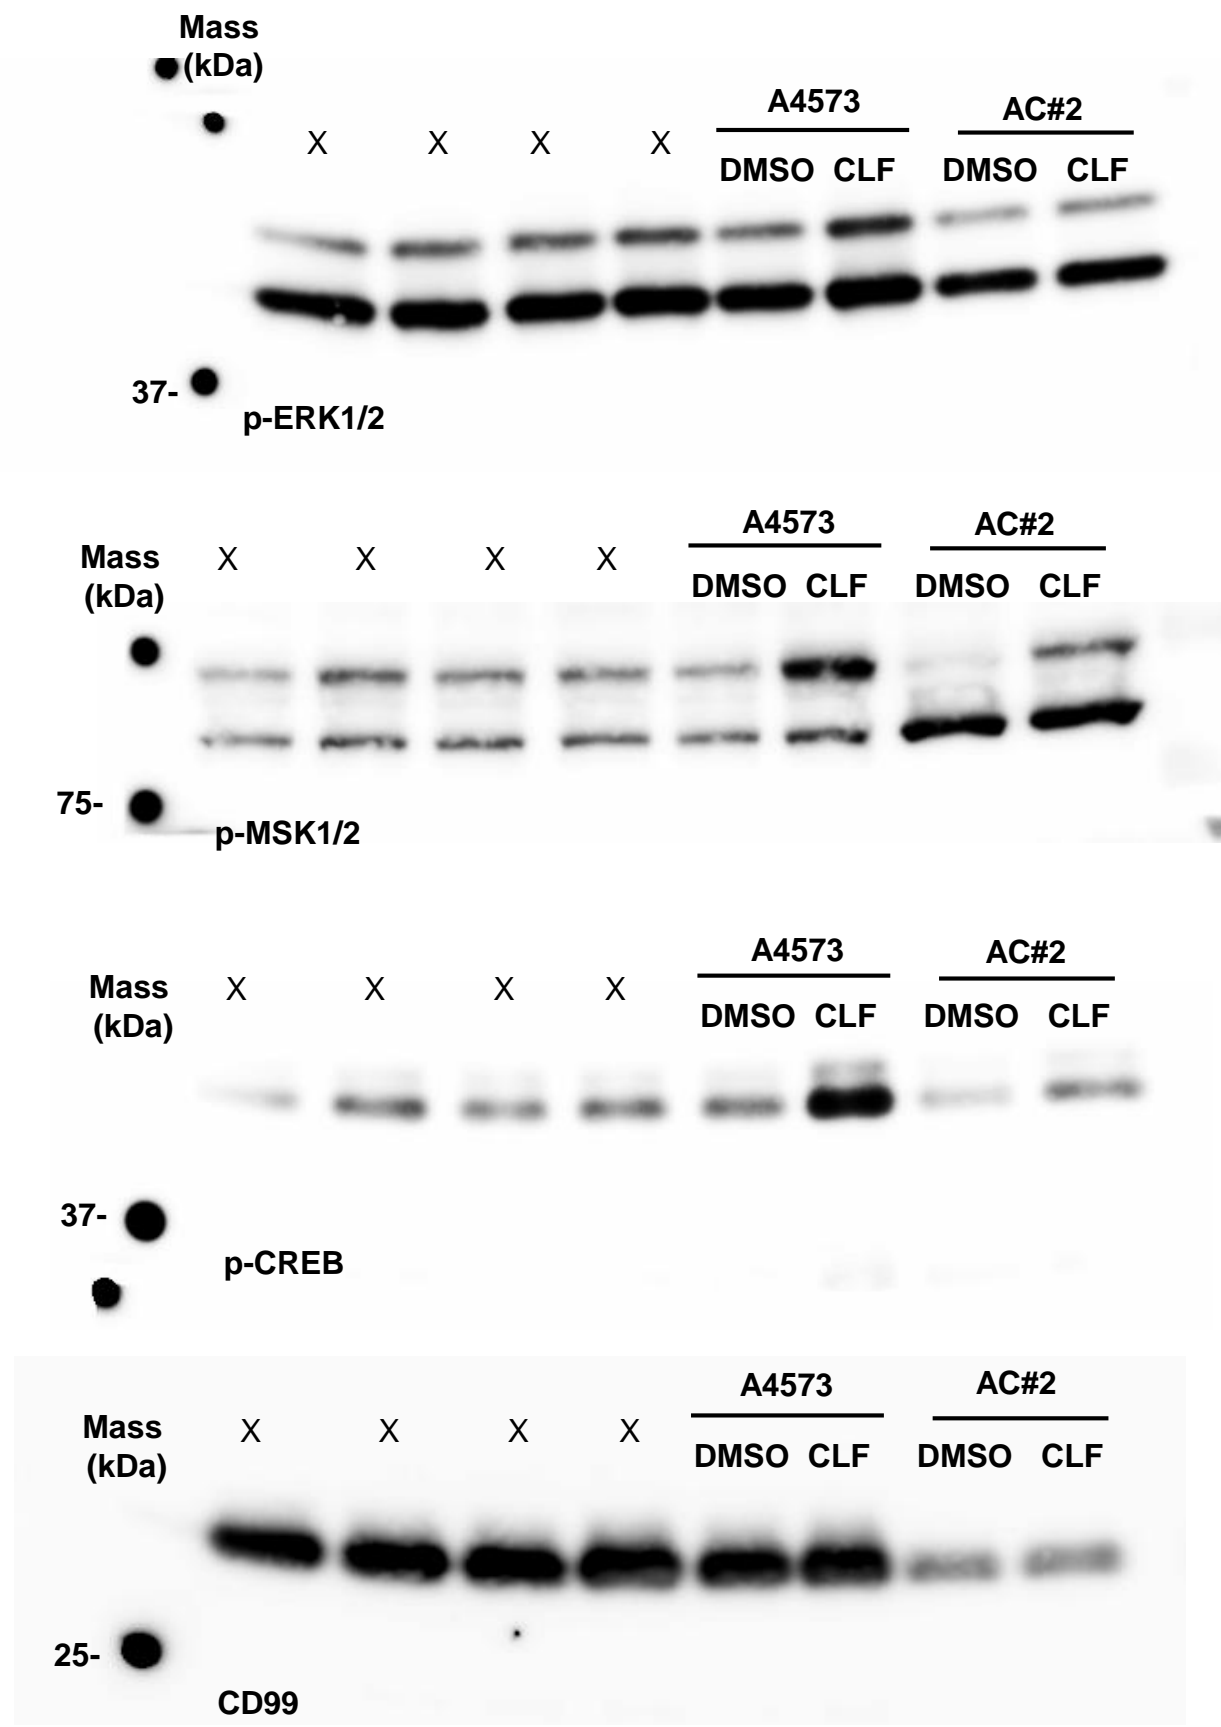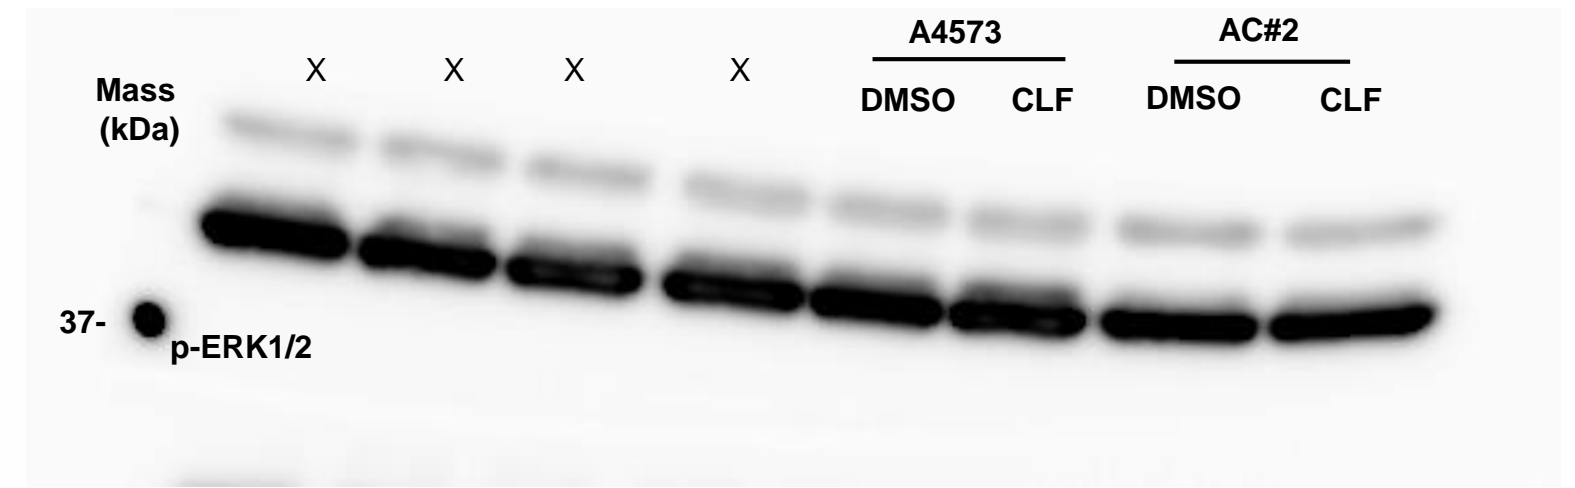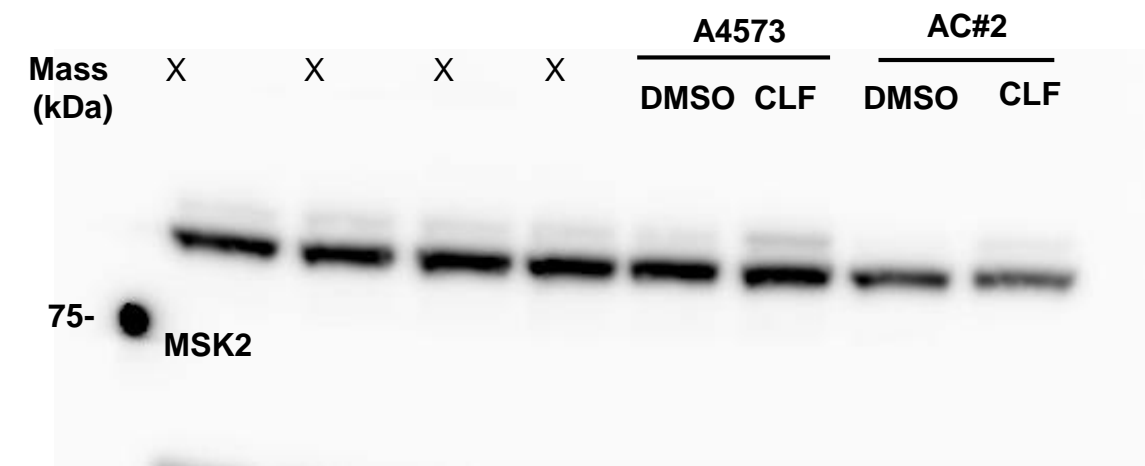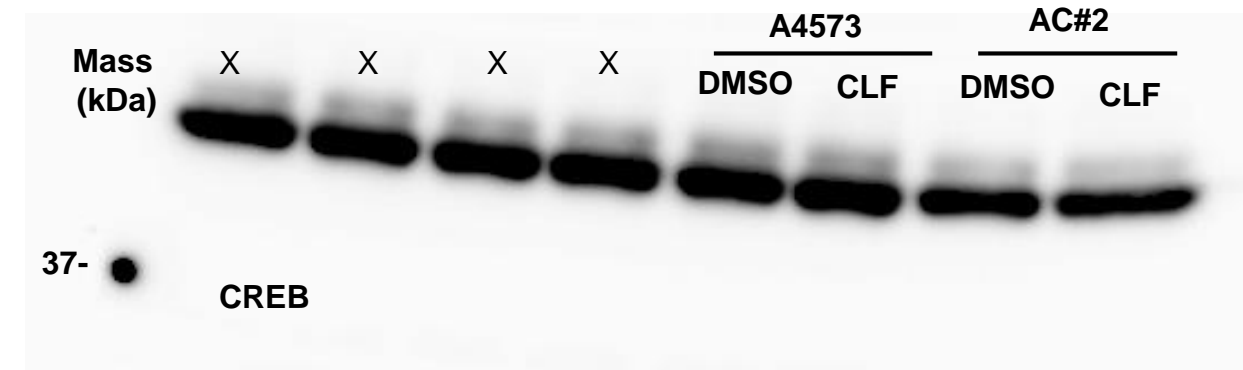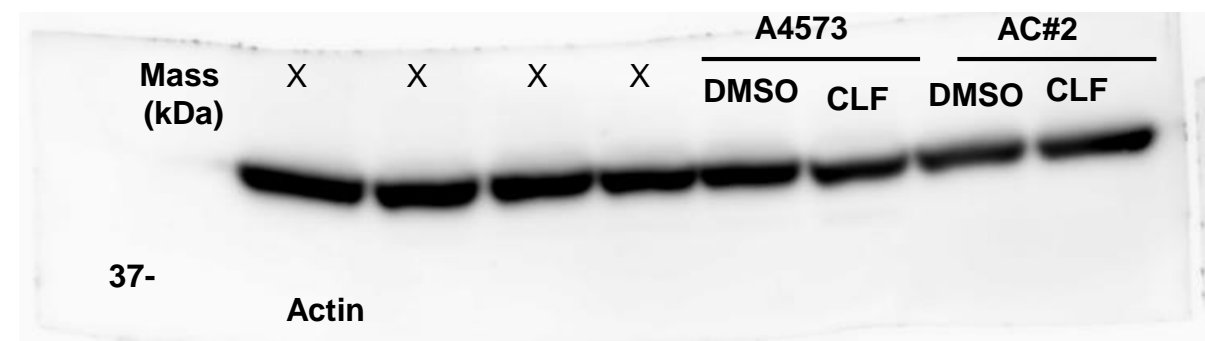

Supplement: pone.0253170.s007.pdf [file pone.0253170.s007.pdf]
